# Supplementary material
Source: bioRxiv or medRxiv preprint supplement (https://www.medrxiv.org/highwire/filestream/92006/field_highwire_adjunct_files/0/2020.08.03.20167056-1.pdf)
Supplement: Supplementary file [file 2020.08.03.20167056-1.pdf]

## Supplementary Materials for

### **The impact of relaxing interventions on human contact patterns and SARS-CoV-2 transmission in China**

Juanjuan Zhang, PhD<sup>1</sup>, Maria Litvinova, PhD<sup>2</sup>, Yuxia Liang, BSc<sup>1</sup>, Wen Zheng, BSc<sup>1</sup>, Huilin Shi, BSc<sup>1</sup>, Prof Alessandro Vespignani, PhD<sup>3,2</sup>, Cecile Viboud, PhD<sup>4</sup>, Marco Ajelli, PhD<sup>5\*†</sup>, Prof Hongjie Yu, PhD<sup>1\*†</sup>

1. School of Public Health, Fudan University, Key Laboratory of Public Health Safety, Ministry of Education, Shanghai, China
2. ISI Foundation, Turin, Italy
3. Laboratory for the Modeling of Biological and Socio-technical Systems, Northeastern University, Boston, MA USA
4. Division of International Epidemiology and Population Studies, Fogarty International Center, National Institutes of Health, Bethesda, MD, USA
5. Department of Epidemiology and Biostatistics, Indiana University School of Public Health, Bloomington, IN, USA

\*Corresponding authors: Marco Ajelli, Department of Epidemiology and Biostatistics, Indiana University School of Public Health, Bloomington, IN 47405, USA, E-mail: [marco.ajelli@gmail.com](mailto:marco.ajelli@gmail.com) or Hongjie Yu, Fudan University, School of Public Health, Key Laboratory of Public Health Safety, Ministry of Education, Shanghai 200032, China; E-mail: [yhj@fudan.edu.cn](mailto:yhj@fudan.edu.cn)

† These authors are joint senior authors contributed equally to this work.

#### **This PDF file includes:**

Materials and Methods

Figs. S1 to S34

Tables S1 to S30

## Table of Contents

|     |                                                                                                                      |    |
|-----|----------------------------------------------------------------------------------------------------------------------|----|
| 1.  | Timeline of contact surveys and interventions in place .....                                                         | 3  |
| 2.  | Survey design .....                                                                                                  | 8  |
| 2.1 | Structure of the contact survey questionnaire .....                                                                  | 8  |
| 2.2 | Survey sampling .....                                                                                                | 8  |
| 2.3 | Data representativeness .....                                                                                        | 10 |
| 3.  | Contact patterns .....                                                                                               | 13 |
| 3.1 | Descriptive characteristics of contact patterns .....                                                                | 13 |
|     | i. Wuhan.....                                                                                                        | 15 |
|     | ii. Shanghai .....                                                                                                   | 18 |
|     | iii. Shenzhen.....                                                                                                   | 21 |
|     | iv. Changsha.....                                                                                                    | 24 |
| 3.2 | Comparison of contact patterns between locations .....                                                               | 27 |
| 3.3 | Physical contacts .....                                                                                              | 29 |
| 3.4 | Contacts by setting .....                                                                                            | 31 |
| 3.5 | Analysis of contact setting during the outbreak and post-lockdown periods.....                                       | 36 |
| 3.6 | Change of contacts over time .....                                                                                   | 38 |
| 3.7 | Construction of the contact matrices and related uncertainty .....                                                   | 41 |
|     | i Assortativity of contacts .....                                                                                    | 42 |
|     | ii. Contact matrix data.....                                                                                         | 44 |
| 4.  | Contacts and mobility.....                                                                                           | 52 |
| 5.  | Modeling SARS-CoV-2 transmission .....                                                                               | 54 |
| 6.  | The impact of relaxing interventions on SARS-CoV-2 transmission .....                                                | 55 |
| 6.1 | Sensitivity analysis for age-specific infectiousness .....                                                           | 55 |
| 6.2 | Sensitivity analysis of a possible compliance bias in contact surveys.....                                           | 55 |
| 7.  | Impact of a possible return to pre-pandemic school, workplace, and community contacts in Shanghai.....               | 56 |
| 7.1 | Contact matrix by setting .....                                                                                      | 57 |
| 7.2 | Scenario 1 School resumption.....                                                                                    | 58 |
| 7.3 | Scenario 2 Workplace resumption.....                                                                                 | 59 |
| 7.4 | Scenario 3 Community resumption.....                                                                                 | 60 |
| 7.5 | Scenario 4 School, workplace, and community resumption .....                                                         | 61 |
|     | i. Susceptibility by age and equal infectiousness by age .....                                                       | 61 |
|     | ii. Susceptibility by age and infectiousness by age.....                                                             | 63 |
|     | iii. Equal susceptibility by age and infectiousness by age.....                                                      | 66 |
|     | iv. Equal susceptibility by age and equal infectiousness by age.....                                                 | 70 |
| 8.  | Impact of a possible return to pre-pandemic school, workplace, and community contacts in Shenzhen and Changsha ..... | 74 |
|     | i. Shenzhen.....                                                                                                     | 74 |
|     | ii. Changsha.....                                                                                                    | 75 |
| 9.  | Degree of return to pre-pandemic contacts leading $R_0=1$ .....                                                      | 76 |

## 1. Timeline of contact surveys and interventions in place

We conducted the social contact surveys in Wuhan, Shanghai, Shenzhen, and Changsha from March 1, 2020 to May 15, 2020, as the interventions have been gradually relaxed and there were only sporadic new confirmed cases of locally transmitted novel coronavirus 2019 (COVID-19). The main control measures implemented in Wuhan, Shanghai, Shenzhen, and Changsha during the COVID-19 outbreak and how these measures were lifted over time were summarized in Tab. S1. The timeline in Tab. S1 corresponds to Figure 1.

*Table S1. Changed control measures in Wuhan, Shanghai, Shenzhen, and Changsha.*

| City            | Date      | Intervention               | Intervention details                        | Source                                                                                                                                                                            |
|-----------------|-----------|----------------------------|---------------------------------------------|-----------------------------------------------------------------------------------------------------------------------------------------------------------------------------------|
| <b>Wuhan</b>    |           |                            |                                             |                                                                                                                                                                                   |
|                 | 2020/1/13 | School closure             | Colleges closed                             | <a href="http://m.wuhan.com/mipw/education/34437.html">http://m.wuhan.com/mipw/education/34437.html</a>                                                                           |
|                 | 2020/1/15 |                            | All schools closed                          | <a href="http://wh.bendibao.com/edu/20191223/105971.shtml">http://wh.bendibao.com/edu/20191223/105971.shtml</a>                                                                   |
|                 | 2020/5/6  |                            | Final-year of senior high schools open      | <a href="http://www.wh.gov.cn/sy/whyw/202005/t20200505_1224802.shtml">http://www.wh.gov.cn/sy/whyw/202005/t20200505_1224802.shtml</a>                                             |
|                 | 2020/1/24 | Workplace closure          | Beginning of Spring Festival holidays       | <a href="http://www.gov.cn/xinwen/2019-11/21/content_5454388.htm">http://www.gov.cn/xinwen/2019-11/21/content_5454388.htm</a>                                                     |
|                 | 2020/3/11 |                            | Workplaces resumed                          | <a href="http://www.wuhan.gov.cn/zwgk/tzgg/202004/t20200414_999282.shtml">http://www.wuhan.gov.cn/zwgk/tzgg/202004/t20200414_999282.shtml</a>                                     |
|                 | 2020/3/17 |                            | Workplace resumption index: 20.61%          | <a href="https://mp.weixin.qq.com/s/7-eWuMz9FIAa-CJpy3ZLFQ">https://mp.weixin.qq.com/s/7-eWuMz9FIAa-CJpy3ZLFQ</a>                                                                 |
|                 | 2020/3/24 |                            | Workplace resumption index: 23.84%          | <a href="https://mp.weixin.qq.com/s/zn4qME7XGSwMcfhufnpXeA">https://mp.weixin.qq.com/s/zn4qME7XGSwMcfhufnpXeA</a>                                                                 |
|                 | 2020/3/31 |                            | Workplace resumption index: 30.55%          | <a href="https://mp.weixin.qq.com/s/xzTXPJ7oH1Fq11YJACGFBQ">https://mp.weixin.qq.com/s/xzTXPJ7oH1Fq11YJACGFBQ</a>                                                                 |
|                 | 2020/4/7  |                            | Workplace resumption index: 37.53%          | <a href="https://mp.weixin.qq.com/s/ODMRpgG-LhCgI7UCW02teA">https://mp.weixin.qq.com/s/ODMRpgG-LhCgI7UCW02teA</a>                                                                 |
|                 | 2020/5/1  |                            | All enterprises resumed at the end of April | <a href="https://epaper.hubeidaily.net/pc/content/202004/26/content_27502.html">https://epaper.hubeidaily.net/pc/content/202004/26/content_27502.html</a>                         |
|                 | 2020/1/23 | Traffic restriction        | City locked down                            | <a href="https://mp.weixin.qq.com/s/yF3xdc0haPk51AOiGyDXNA">https://mp.weixin.qq.com/s/yF3xdc0haPk51AOiGyDXNA</a>                                                                 |
|                 | 2020/4/8  |                            | City unlocked                               | <a href="http://www.wuhan.gov.cn/zwgk/tzgg/202004/t20200414_999326.shtml">http://www.wuhan.gov.cn/zwgk/tzgg/202004/t20200414_999326.shtml</a>                                     |
|                 | 2020/1/28 | Close community management | Beginning of close community management     | <a href="http://www.bzdc.cn/bzms/65296.html">http://www.bzdc.cn/bzms/65296.html</a>                                                                                               |
|                 | 2020/3/28 |                            | End of close community management           | <a href="http://www.hubei.gov.cn/zhuanti/2020/gzxxgzbd/zxtb/202003/t20200328_2195490.shtml">http://www.hubei.gov.cn/zhuanti/2020/gzxxgzbd/zxtb/202003/t20200328_2195490.shtml</a> |
| <b>Shanghai</b> |           |                            |                                             |                                                                                                                                                                                   |
|                 | 2020/1/11 | School closure             | Colleges closed                             | <a href="http://sh.bendibao.com/news/20191223/214530.shtml">http://sh.bendibao.com/news/20191223/214530.shtml</a>                                                                 |
|                 | 2020/1/18 |                            | All schools closed                          | <a href="http://sh.bendibao.com/news/201937/202954.shtml">http://sh.bendibao.com/news/201937/202954.shtml</a>                                                                     |
|                 | 2020/1/24 | Workplace closure          | Beginning of Spring Festival holidays       | <a href="http://www.gov.cn/xinwen/2019-11/21/content_5454388.htm">http://www.gov.cn/xinwen/2019-11/21/content_5454388.htm</a>                                                     |
|                 | 2020/2/10 |                            | Workplaces resumed                          | <a href="http://www.shanghai.gov.cn/nw2/nw2314/nw2315/nw4411/u21aw1423599.html">http://www.shanghai.gov.cn/nw2/nw2314/nw2315/nw4411/u21aw1423599.html</a>                         |
|                 | 2020/2/25 |                            | Workplace resumption index: 34.67%          | <a href="https://mp.weixin.qq.com/s/IVe-2A1MI7GO7Tr1Xvo5UA">https://mp.weixin.qq.com/s/IVe-2A1MI7GO7Tr1Xvo5UA</a>                                                                 |
|                 | 2020/3/3  |                            | Workplace resumption index: 57.23%          | <a href="https://mp.weixin.qq.com/s/QQfgyba6cjI-60XIytInqw">https://mp.weixin.qq.com/s/QQfgyba6cjI-60XIytInqw</a>                                                                 |
|                 | 2020/3/10 |                            | Workplace resumption index: 63.91%          | <a href="https://mp.weixin.qq.com/s/xbe-2TzFnkHrth4w7ZcEw">https://mp.weixin.qq.com/s/xbe-2TzFnkHrth4w7ZcEw</a>                                                                   |
|                 | 2020/3/17 |                            | Workplace resumption index: 69.7%           | <a href="https://mp.weixin.qq.com/s/7-eWuMz9FIAa-CJpy3ZLFQ">https://mp.weixin.qq.com/s/7-eWuMz9FIAa-CJpy3ZLFQ</a>                                                                 |

|           |                            |                                                                                          |                                                                                                                                                                               |
|-----------|----------------------------|------------------------------------------------------------------------------------------|-------------------------------------------------------------------------------------------------------------------------------------------------------------------------------|
| 2020/3/24 |                            | Workplace resumption index: 74.44%                                                       | <a href="https://mp.weixin.qq.com/s/zn4qME7XGSwMcfhufnpXeA">https://mp.weixin.qq.com/s/zn4qME7XGSwMcfhufnpXeA</a>                                                             |
| 2020/3/31 |                            | Workplace resumption index: 78.13%                                                       | <a href="https://mp.weixin.qq.com/s/xzTXPJ7oH1Fq11YJACGFBQ">https://mp.weixin.qq.com/s/xzTXPJ7oH1Fq11YJACGFBQ</a>                                                             |
| 2020/4/7  |                            | Workplace resumption index: 81.04%                                                       | <a href="https://mp.weixin.qq.com/s/ODMRpgG-LhCgI7UCW02teA">https://mp.weixin.qq.com/s/ODMRpgG-LhCgI7UCW02teA</a>                                                             |
| 2020/1/23 | Traffic restriction        | Restriction on bus travel to Hubei province                                              | <a href="http://www.shanghai.gov.cn/nw2/nw2314/nw32419/nw48516/nw48539/u21aw1423542.html">http://www.shanghai.gov.cn/nw2/nw2314/nw32419/nw48516/nw48539/u21aw1423542.html</a> |
| 2020/1/26 |                            | Restriction on all inter-provincial bus travel                                           | <a href="http://www.shanghai.gov.cn/nw2/nw2314/nw32419/nw48516/nw48539/u21aw1423571.html">http://www.shanghai.gov.cn/nw2/nw2314/nw32419/nw48516/nw48539/u21aw1423571.html</a> |
| 2020/3/13 |                            | Restoration of inter-provincial bus travel with Anhui, Jiangsu and Zhejiang Province     | <a href="http://www.shanghai.gov.cn/nw2/nw2314/nw2315/nw4411/u21aw1432380.html">http://www.shanghai.gov.cn/nw2/nw2314/nw2315/nw4411/u21aw1432380.html</a>                     |
| 2020/3/23 |                            | Restoration of inter-provincial bus travel with other provinces/cities except Wuhan city | <a href="http://service.shanghai.gov.cn/SHVideo/newvideoshow.aspx?id=CE494FA6B211B47F">http://service.shanghai.gov.cn/SHVideo/newvideoshow.aspx?id=CE494FA6B211B47F</a>       |
| 2020/4/8  |                            | Restoration of all inter-provincial bus travel                                           | <a href="http://www.wuhan.gov.cn/zwgk/tzgg/202004/t20200414_999326.shtml">http://www.wuhan.gov.cn/zwgk/tzgg/202004/t20200414_999326.shtml</a>                                 |
| 2020/2/3  | Close community management | Beginning of close community management                                                  | <a href="https://baijiahao.baidu.com/s?id=1657956799138015813&amp;wfr=spider&amp;for=pc">https://baijiahao.baidu.com/s?id=1657956799138015813&amp;wfr=spider&amp;for=pc</a>   |
| 2020/3/4  |                            | End of close community management                                                        | <a href="http://www.shanghai.gov.cn/nw2/nw2314/nw2315/nw4411/u21aw1431489.html">http://www.shanghai.gov.cn/nw2/nw2314/nw2315/nw4411/u21aw1431489.html</a>                     |

### Shenzhen

|           |                   |                                    |                                                                                                                                                                             |
|-----------|-------------------|------------------------------------|-----------------------------------------------------------------------------------------------------------------------------------------------------------------------------|
| 2020/1/13 | School closure    | Colleges closed                    | <a href="https://new.qq.com/omn/20191019/20191019A03RFA00">https://new.qq.com/omn/20191019/20191019A03RFA00</a>                                                             |
| 2020/1/19 |                   | All schools closed                 | <a href="https://baijiahao.baidu.com/s?id=1649529385324544270&amp;wfr=spider&amp;for=pc">https://baijiahao.baidu.com/s?id=1649529385324544270&amp;wfr=spider&amp;for=pc</a> |
| 2020/1/24 | Workplace closure | Beginning of Spring Festival       | <a href="http://www.gov.cn/xinwen/2019-11/21/content_5454388.htm">http://www.gov.cn/xinwen/2019-11/21/content_5454388.htm</a>                                               |
| 2020/1/10 |                   | Workplaces resumed                 | <a href="http://www.gd.gov.cn/gkmlpt/content/2/2879/post_2879851.html#43">http://www.gd.gov.cn/gkmlpt/content/2/2879/post_2879851.html#43</a>                               |
| 2020/2/25 |                   | Workplace resumption index: 28.59% | <a href="https://mp.weixin.qq.com/s/IVe-2A1MI7GO7TrIXvo5UA">https://mp.weixin.qq.com/s/IVe-2A1MI7GO7TrIXvo5UA</a>                                                           |
| 2020/3/3  |                   | Workplace resumption index: 53.74% | <a href="https://mp.weixin.qq.com/s/QQfgyba6cjI-60XIytInqw">https://mp.weixin.qq.com/s/QQfgyba6cjI-60XIytInqw</a>                                                           |
| 2020/3/10 |                   | Workplace resumption index: 61.94% | <a href="https://mp.weixin.qq.com/s/xbe-2TzFnkHrIth4w7ZcEw">https://mp.weixin.qq.com/s/xbe-2TzFnkHrIth4w7ZcEw</a>                                                           |
| 2020/3/17 |                   | Workplace resumption index: 67.74% | <a href="https://mp.weixin.qq.com/s/7-eWuMz9FIAa-CJpy3ZLfq">https://mp.weixin.qq.com/s/7-eWuMz9FIAa-CJpy3ZLfq</a>                                                           |
| 2020/3/24 |                   | Workplace resumption index: 72.65% | <a href="https://mp.weixin.qq.com/s/zn4qME7XGSwMcfhufnpXeA">https://mp.weixin.qq.com/s/zn4qME7XGSwMcfhufnpXeA</a>                                                           |
| 2020/3/31 |                   | Workplace resumption index: 76.95% | <a href="https://mp.weixin.qq.com/s/xzTXPJ7oH1Fq11YJACGFBQ">https://mp.weixin.qq.com/s/xzTXPJ7oH1Fq11YJACGFBQ</a>                                                           |
| 2020/4/7  |                   | Workplace resumption index: 80.01% | <a href="https://mp.weixin.qq.com/s/ODMRpgG-LhCgI7UCW02teA">https://mp.weixin.qq.com/s/ODMRpgG-LhCgI7UCW02teA</a>                                                           |

|                 |                            |                                                                            |                                                                                                                                                                                                                                                                           |
|-----------------|----------------------------|----------------------------------------------------------------------------|---------------------------------------------------------------------------------------------------------------------------------------------------------------------------------------------------------------------------------------------------------------------------|
| 2020/1/25       | Traffic restriction        | Restriction on bus travel to Wuhan                                         | <a href="http://www.gd.gov.cn/gdywdt/zwzt/yqfk/gdxd/content/post_2879193.html">http://www.gd.gov.cn/gdywdt/zwzt/yqfk/gdxd/content/post_2879193.html</a>                                                                                                                   |
| 2020/1/29       |                            | Restriction on almost all inter-provincial bus travel                      | <a href="http://www.gd.gov.cn/gdywdt/zwzt/yqfk/gdxd/content/post_2880255.html">http://www.gd.gov.cn/gdywdt/zwzt/yqfk/gdxd/content/post_2880255.html</a>                                                                                                                   |
| 2020/2/17       |                            | Restoration of inter-provincial bus travel with Hunan and Sichuan province | <a href="http://www.cnr.cn/gd/gdkx/20200218/t20200218_524979634.shtml">http://www.cnr.cn/gd/gdkx/20200218/t20200218_524979634.shtml</a>                                                                                                                                   |
| 2020/2/22       |                            | Restoration of all inter-provincial bus travel                             | <a href="https://baijiahao.baidu.com/s?id=1659235760106857566&amp;wfr=spider&amp;for=pc">https://baijiahao.baidu.com/s?id=1659235760106857566&amp;wfr=spider&amp;for=pc</a>                                                                                               |
| 2020/2/6        | Close community management | Beginning of close community management                                    | <a href="http://www.sz.gov.cn/szzt2010/yqfk2020/szzxd/zczy/zcwj/fkzc/content/post_6725195.html">http://www.sz.gov.cn/szzt2010/yqfk2020/szzxd/zczy/zcwj/fkzc/content/post_6725195.html</a>                                                                                 |
| 2020/3/22       |                            | End of close community management                                          | <a href="https://mp.weixin.qq.com/s/QYhcZOE5IMszZi56btigHA">https://mp.weixin.qq.com/s/QYhcZOE5IMszZi56btigHA</a>                                                                                                                                                         |
| <b>Changsha</b> |                            |                                                                            |                                                                                                                                                                                                                                                                           |
| 2020/1/8        | School closure             | Colleges closed                                                            | <a href="https://photo.weibo.com/1986888471/wbphotos/large/mid/4441457257554314/pid/766d8317ly1g9cd8xdazvj20ku0x7wu0?Refer=weibofeedv5">https://photo.weibo.com/1986888471/wbphotos/large/mid/4441457257554314/pid/766d8317ly1g9cd8xdazvj20ku0x7wu0?Refer=weibofeedv5</a> |
| 2020/1/12       |                            | All schools closed                                                         | <a href="http://cs.bendibao.com/edu/2019125/56332.shtm">http://cs.bendibao.com/edu/2019125/56332.shtm</a>                                                                                                                                                                 |
| 2020/4/7        |                            | Final year of junior high school and senior high schools open              | <a href="http://cs.bendibao.com/edu/2019125/56332.shtm">http://cs.bendibao.com/edu/2019125/56332.shtm</a>                                                                                                                                                                 |
| 2020/4/13       |                            | Other years of junior high school and high schools open                    | <a href="http://cs.bendibao.com/edu/2019125/56332.shtm">http://cs.bendibao.com/edu/2019125/56332.shtm</a>                                                                                                                                                                 |
| 2020/1/24       | Workplace closure          | Beginning of spring Festival holidays                                      | <a href="http://www.gov.cn/xinwen/2019-11/21/content_5454388.htm">http://www.gov.cn/xinwen/2019-11/21/content_5454388.htm</a>                                                                                                                                             |
| 2020/1/10       |                            | Workplaces resumed                                                         | <a href="https://baijiahao.baidu.com/s?id=1657262419923656054&amp;wfr=spider&amp;for=pc">https://baijiahao.baidu.com/s?id=1657262419923656054&amp;wfr=spider&amp;for=pc</a>                                                                                               |
| 2020/2/25       |                            | Workplace resumption index: 32.52%                                         | <a href="https://mp.weixin.qq.com/s/IVe-2A1MI7GO7Tr1Xvo5UA">https://mp.weixin.qq.com/s/IVe-2A1MI7GO7Tr1Xvo5UA</a>                                                                                                                                                         |
| 2020/3/3        |                            | Workplace resumption index: 55.46%                                         | <a href="https://mp.weixin.qq.com/s/QQfgyba6cjI-60XIytInqw">https://mp.weixin.qq.com/s/QQfgyba6cjI-60XIytInqw</a>                                                                                                                                                         |
| 2020/3/10       |                            | Workplace resumption index: 61.68%                                         | <a href="https://mp.weixin.qq.com/s/xbe-2TzFnkHrIth4w7ZcEw">https://mp.weixin.qq.com/s/xbe-2TzFnkHrIth4w7ZcEw</a>                                                                                                                                                         |
| 2020/3/17       |                            | Workplace resumption index: 66.94%                                         | <a href="https://mp.weixin.qq.com/s/7-eWuMz9FIAa-CJpy3ZLFQ">https://mp.weixin.qq.com/s/7-eWuMz9FIAa-CJpy3ZLFQ</a>                                                                                                                                                         |
| 2020/3/24       |                            | Workplace resumption index: 71.38%                                         | <a href="https://mp.weixin.qq.com/s/zn4qME7XGSwMcfhufnpXeA">https://mp.weixin.qq.com/s/zn4qME7XGSwMcfhufnpXeA</a>                                                                                                                                                         |
| 2020/3/31       |                            | Workplace resumption index: 74.86%                                         | <a href="https://mp.weixin.qq.com/s/xzTXPJ7oH1Fq11YJACGFBO">https://mp.weixin.qq.com/s/xzTXPJ7oH1Fq11YJACGFBO</a>                                                                                                                                                         |
| 2020/4/7        |                            | Workplace resumption index: 77.95%                                         | <a href="https://mp.weixin.qq.com/s/ODMRpgG-LhCgI7UCW02teA">https://mp.weixin.qq.com/s/ODMRpgG-LhCgI7UCW02teA</a>                                                                                                                                                         |
| 2020/1/26       | Traffic restriction        | Restriction on bus travel to Hubei Province                                | <a href="http://jtt.hunan.gov.cn/jtt/xxgk/gzdt/jtyw1/202001/t20200127_11164986.html">http://jtt.hunan.gov.cn/jtt/xxgk/gzdt/jtyw1/202001/t20200127_11164986.html</a>                                                                                                       |
| 2020/1/28       |                            | Restriction on almost all inter-provincial bus travel                      | <a href="http://jtt.hunan.gov.cn/jtt/xxgk/gzdt/jtyw1/202001/t20200131_11166724.html">http://jtt.hunan.gov.cn/jtt/xxgk/gzdt/jtyw1/202001/t20200131_11166724.html</a>                                                                                                       |

---

|           |                            |                                                                                                               |                                                                                                                                                                               |
|-----------|----------------------------|---------------------------------------------------------------------------------------------------------------|-------------------------------------------------------------------------------------------------------------------------------------------------------------------------------|
| 2020/2/26 |                            | Restoration of inter-provincial bus travel with other provinces/cities except Hubei Province and Beijing city | <a href="https://mp.weixin.qq.com/s/xQHrvstA0zO9yeDXXO5wgA">https://mp.weixin.qq.com/s/xQHrvstA0zO9yeDXXO5wgA</a>                                                             |
| 2020/3/28 |                            | Restoration of inter-provincial bus travel with other provinces/cities except Wuhan and Beijing city          | <a href="http://jtt.hunan.gov.cn/jtt/hnygi/ygyw/202003/t20200330_11827115.html">http://jtt.hunan.gov.cn/jtt/hnygi/ygyw/202003/t20200330_11827115.html</a>                     |
| 2020/4/8  |                            | Restoration of all inter-provincial bus travel                                                                | <a href="http://www.wuhan.gov.cn/zwgk/tzgg/202004/t20200414_999326.shtml">http://www.wuhan.gov.cn/zwgk/tzgg/202004/t20200414_999326.shtml</a>                                 |
| 2020/2/14 | Close community management | Beginning of close community management                                                                       | <a href="http://wsjkw.changsha.gov.cn/ztzl_1/fkxxgzbd/tzgg/202002/t20200215_6446077.html">http://wsjkw.changsha.gov.cn/ztzl_1/fkxxgzbd/tzgg/202002/t20200215_6446077.html</a> |
| 2020/3/11 |                            | End of close community management                                                                             | <a href="http://www.changsha.gov.cn/jdhy/hygq/hygq/202003/t20200311_6846758.html">http://www.changsha.gov.cn/jdhy/hygq/hygq/202003/t20200311_6846758.html</a>                 |

---

Note that workplace resumption index defined by Baidu (<https://huiyan.baidu.com/>) is the ratio of the cumulative number of active working population since January 31 to the number of baseline active working population (using the same period in 2019 as baseline), which can be used to measure the progress of workplace resumption. The close community management may be implemented under different intensity in the four study locations, such that it is not comparable among these four cities.

## 2. Survey design

### 2.1 Structure of the contact survey questionnaire

Questionnaires were administered by phone by trained staff; a summary of the sampling scheme is provided below. The questionnaire consisted of four sections: 1) general information (e.g., sex, age, type of profession, and household size); 2) contact diary for a regular weekday between December 24, 2019 and December 30, 2019 before the outbreak of unexplained pneumonia was officially announced by the Wuhan Municipal Health Commission (period used as baseline); 3) contact diary during the COVID-19 outbreak between February 3 and February 9 when the strict containment measures were in place (period used as the outbreak); and 4) contact diary of the day before the survey date (period used as the post-lockdown). In line with the POLYMOD study(12), a contact was defined as either, (1) a two-way conversation involving three or more words in the physical presence of another person (conversational contact), or (2) a direct physical (skin-to-skin) contact (e.g., a handshake, hug, kiss or performing contact sports). For the contact diary during the post-lockdown period, participants were requested to record each contact they had within a 24-hour period from 5:00 am of the day before the telephone interview to 5:00am the day of the interview. For each contact, the following information was recorded: age, sex, relation, social setting where the contact took place (e.g., home, workplace), and type of contact (conversational or physical). For the contact diary related to outbreak period, each contact during one day of the outbreak period would be recorded as the dairy during post-lockdown period was required. For the contact diary related to regular days (pre-pandemic), contacts were aggregated by age group.

### 2.2 Survey sampling

The survey was conducted by using a platform well-established by the authors during the outbreak of human infection with avian influenza A(H7N9), which uses a computerized random digital dialing system (42). Only mobile phone numbers were used. The sample size was calculated based on the same methodology used in our previous survey(9, 10). We planned to recruit 800 participants for each location with equal sample size for different age groups. Eligibility criteria were defined as: 1) being a local resident of Shanghai, Shenzhen, Changsha or Wuhan of any age; 2) having lived in the selected city for more than six months in the past year; 3) being present in the city at the time of interview. Calls were placed three times at different hours on the same day before being classified as invalid. Interviews of underaged individuals took place after the approval of the legal guardian who assisted the child in responding to the questionnaire. Who completed the questionnaire depended on the participant's age following: 1) parental-proxy completion for ages 0 to 10 yrs; 2) self-completion for individuals aged 11 to 17 years, subject to informed parental consent; and 3) self-completion and informed consent for participants above 18 years of age. Fig. S1 shows the flow chart of the participant recruitment process.



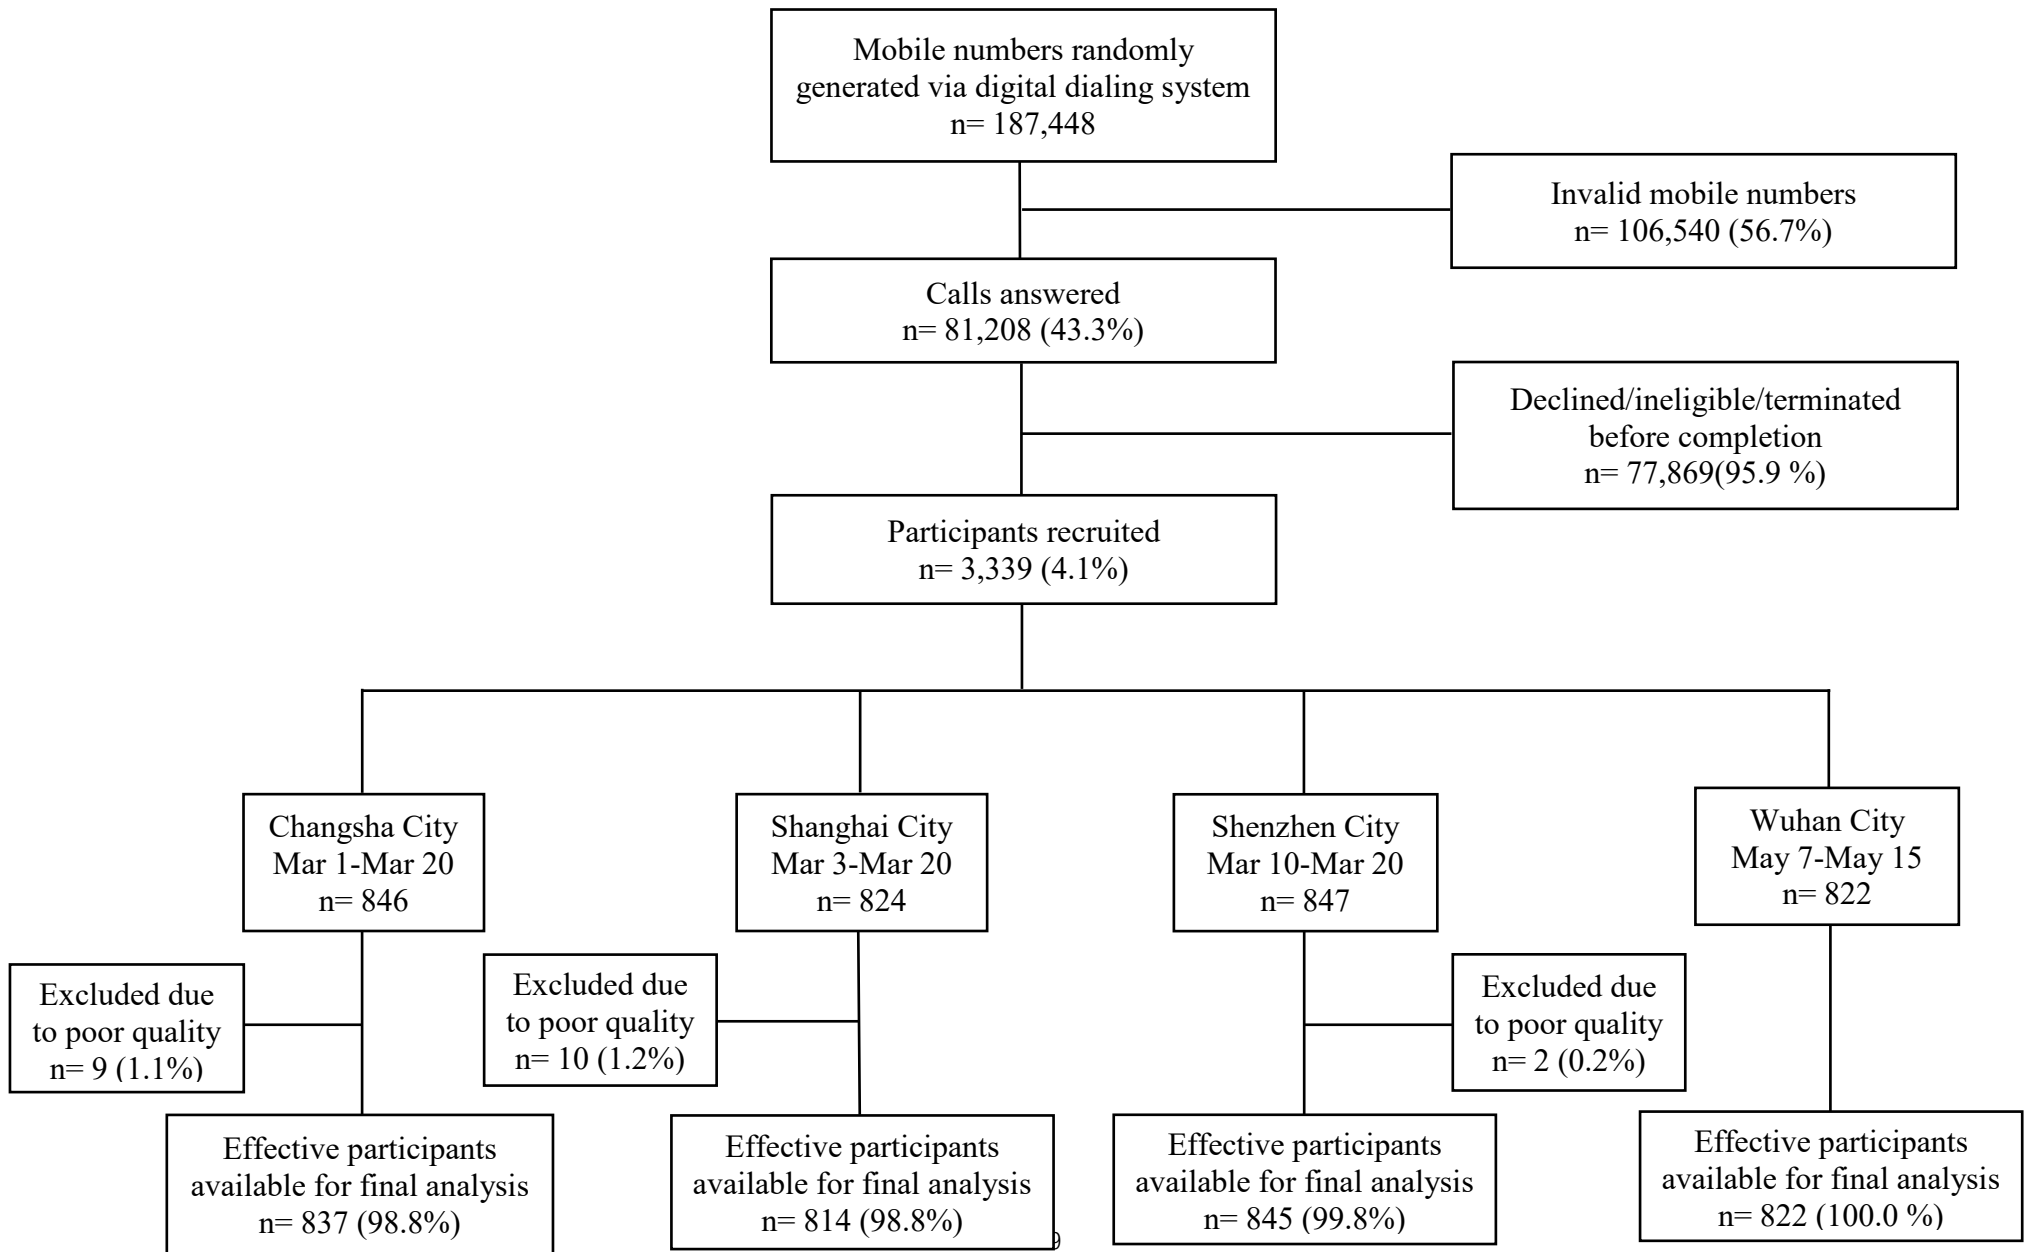

**Figure S1.** Flow chart of the sampling telephone survey.

### 2.3 Data representativeness

Overall, 3,318 participants (822 in Wuhan, 814 in Shanghai, 845 in Shenzhen, and 837 in Changsha) in this contact survey were included in the analysis. In Wuhan, 438 (53.28%) of participants were female, the average age was 40 years (range 1-94), and the average household size was 3 (range 1-6). In Shanghai, 414 (50.86%) of participants were female, the average age was 39 years (range 0-89), and the average household size was 3 (range 1-9). In Shenzhen, 424 (50.18%) of participants were female, the average age was 38 years (range 2-89), and the average household size was 2.8 (range 1-7). In Changsha, 431 (51.49%) of participants were female, the average age was 39 years (range 1-85), and the average household size was 3 (range 1-8). We also included 965 individuals from a previous contact survey conducted in Shanghai by the same team as a baseline for Shanghai(10), 624 individuals as a baseline for Wuhan, 627 individuals as the outbreak period for Wuhan, and 557 individuals as the outbreak period for Shanghai that were conducted by the same team(9).

The demographics of enrolled participants in the four locations didn't aligned with the actual populations of these cities (Tab. S2-5, and Fig. S2), because the participants were sampled as equal age group and sex. But the proportion of employed is comparable between the survey participants and the census for each city, even under different age groups (Tab. S6).

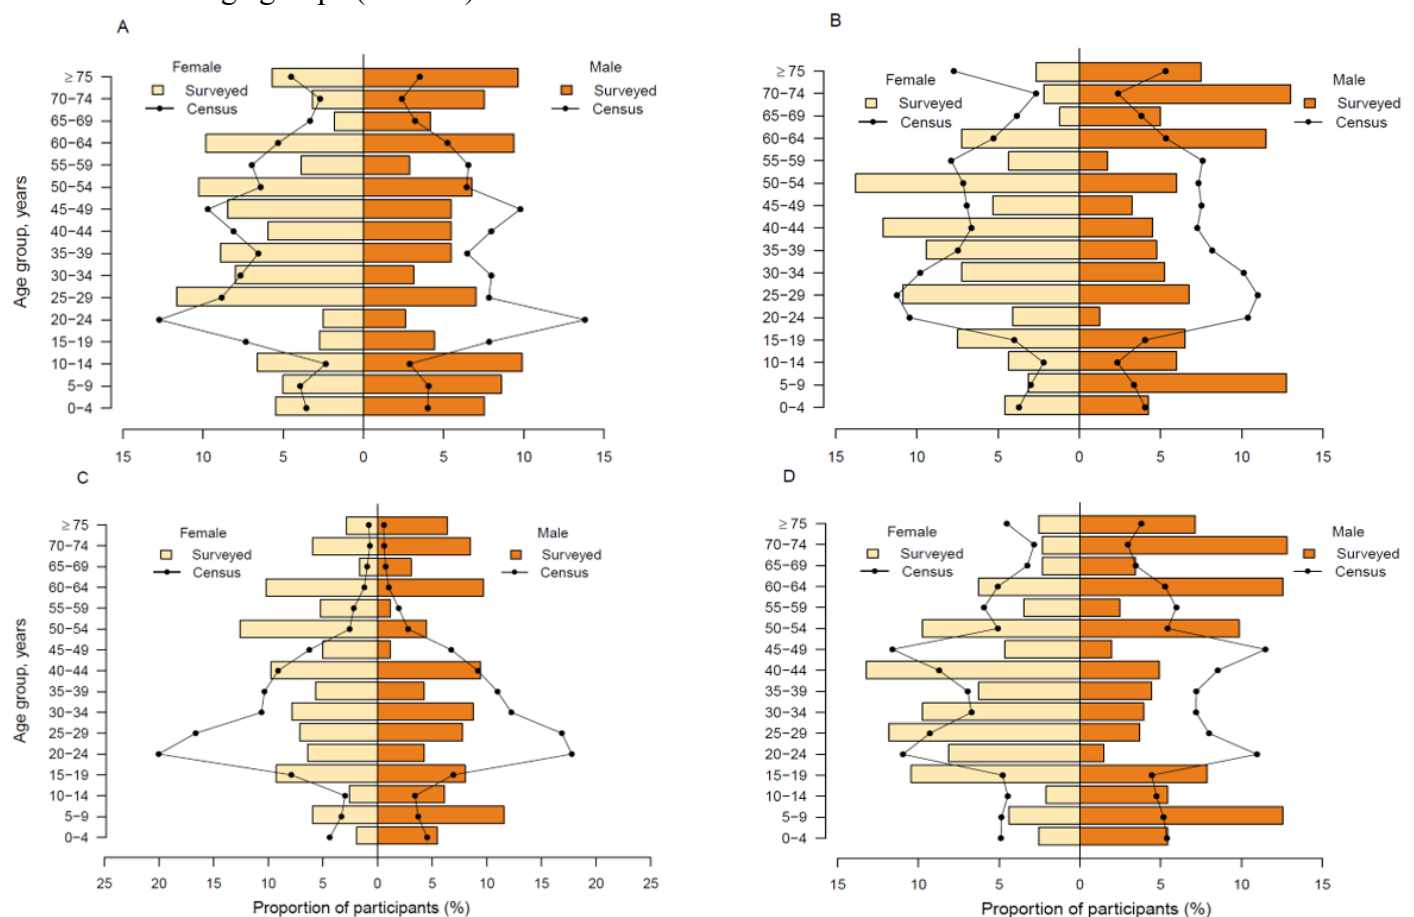

**Figure S2.** Study population demographics. *A* Study population demographics by age and gender for Wuhan. *B* Same as *A*, but for Shanghai. *C* Same as *A*, but for Shenzhen. *D* Same as *A*, but for Changsha. Black dotted lines denote expected distributions based on age-gender distributions derived from census 2016.

**Table S2.** *Comparison between the total population and contact survey participants in Wuhan.*

| <b>Characteristics</b> | <b>Total population (%)<br/>(n= 10,766,200)</b> | <b>Effective participants (%)<br/>(n=822)</b> |
|------------------------|-------------------------------------------------|-----------------------------------------------|
| Sex                    |                                                 |                                               |
| Female                 | 5,250,583 (48.77)                               | 438 (53.28)                                   |
| Male                   | 5,515,617 (51.23)                               | 384 (46.72)                                   |
| Age group, years       |                                                 |                                               |
| 0-9                    | 839,016 (7.79)                                  | 108 (13.14)                                   |
| 10-19                  | 1,099,717 (10.21)                               | 96 (11.68)                                    |
| 20-29                  | 2,326,297 (21.61)                               | 99 (12.04)                                    |
| 30-39                  | 1,543,492 (14.34)                               | 107 (13.02)                                   |
| 40-49                  | 1,914,285 (17.78)                               | 105 (12.77)                                   |
| 50-59                  | 1,417,978 (13.17)                               | 99 (12.04)                                    |
| 60-69                  | 921,259 (8.56)                                  | 103 (12.53)                                   |
| ≥70                    | 704,156 (6.54)                                  | 105 (12.77)                                   |

**Table S3.** *Comparison between the total population and contact survey participants in Shanghai.*

| <b>Characteristics</b> | <b>Total population (%)<br/>(n=24,197,001)</b> | <b>Effective participants (%)<br/>(n=814)</b> |
|------------------------|------------------------------------------------|-----------------------------------------------|
| Sex                    |                                                |                                               |
| Female                 | 11,628,822 (48.06)                             | 414 (50.86)                                   |
| Male                   | 12,568,179 (51.94)                             | 400 (49.14)                                   |
| Age group, years       |                                                |                                               |
| 0-9                    | 1,710,754 (7.07)                               | 100 (12.29)                                   |
| 10-19                  | 1,524,899 (6.30)                               | 99 (12.16)                                    |
| 20-29                  | 5,205,172 (21.51)                              | 94 (11.55)                                    |
| 30-39                  | 4,308,547 (17.81)                              | 109 (13.39)                                   |
| 40-49                  | 3,435,732 (14.20)                              | 103 (12.65)                                   |
| 50-59                  | 3,625,168 (14.98)                              | 106 (13.02)                                   |
| 60-69                  | 2,212,111 (9.14)                               | 101 (12.41)                                   |
| ≥70                    | 2,174,618 (8.99)                               | 102 (12.53)                                   |

**Table S4.** *Comparison between the total population and contact survey participants in Shenzhen.*

| <b>Characteristics</b> | <b>Total population (%)<br/>(n=11,908,405)</b> | <b>Effective participants (%)<br/>(n=845)</b> |
|------------------------|------------------------------------------------|-----------------------------------------------|
| Sex                    |                                                |                                               |
| Female                 | 5,386,608 (45.23)                              | 421 (49.82)                                   |
| Male                   | 6,521,797 (54.77)                              | 424 (50.18)                                   |
| Age group, years       |                                                |                                               |
| 0-9                    | 952,366 (8.00)                                 | 105 (12.43)                                   |
| 10-19                  | 1,260,662 (10.59)                              | 110 (13.02)                                   |
| 20-29                  | 4,234,033 (35.55)                              | 108 (12.78)                                   |
| 30-39                  | 2,643,441 (22.20)                              | 112 (13.25)                                   |
| 40-49                  | 1,864,899 (15.66)                              | 107 (12.66)                                   |
| 50-59                  | 563,522 (4.73)                                 | 99 (11.72)                                    |
| 60-69                  | 231,097 (1.94)                                 | 104 (12.31)                                   |
| ≥70                    | 158,385 (1.33)                                 | 100 (11.83)                                   |

**Table S5.** *Comparison between the total population and contact survey participants in Changsha.*

| <b>Characteristics</b> | <b>Total population (%)<br/>(n=7,645,200)</b> | <b>Effective participants (%)<br/>(n=837)</b> |
|------------------------|-----------------------------------------------|-----------------------------------------------|
| Sex                    |                                               |                                               |
| Female                 | 3,776,566 (49.4)                              | 431 (51.49)                                   |
| Male                   | 3,868,634 (50.6)                              | 406 (48.51)                                   |
| Age group, years       |                                               |                                               |
| 0-9                    | 777,286 (10.17)                               | 103 (12.31)                                   |
| 10-19                  | 704,907 (9.22)                                | 108 (12.9)                                    |
| 20-29                  | 1,498,037 (19.59)                             | 107 (12.78)                                   |
| 30-39                  | 1,072,724 (14.03)                             | 103 (12.31)                                   |
| 40-49                  | 1,541,722 (20.17)                             | 105 (12.54)                                   |
| 50-59                  | 857,369 (11.21)                               | 107 (12.78)                                   |
| 60-69                  | 652,636 (8.54)                                | 102 (12.19)                                   |
| ≥70                    | 540,519 (7.07)                                | 102 (12.19)                                   |

**Table S6.** Comparison of the fraction of employed individuals by age group between the total population and the contact survey participants.

| Age, years | Wuhan                    |                    | Shanghai                 |                    | Shenzhen                 |                    | Changsha                 |                    |
|------------|--------------------------|--------------------|--------------------------|--------------------|--------------------------|--------------------|--------------------------|--------------------|
|            | Census 2010 <sup>a</sup> | Survey             | Census 2015 <sup>b</sup> | Survey             | Census 2015 <sup>c</sup> | Survey             | Census 2015 <sup>d</sup> | Survey             |
| Overall    | 58.5%                    | 52.8%<br>(327/619) | 60.2%                    | 54.8%<br>(342/624) | 68.3%                    | 52.4%<br>(330/630) | 56.7%                    | 54.0%<br>(338/626) |
| 20-29      | 57.9%                    | 81.8%<br>(81/99)   | 81.2%                    | 79.4%<br>(77/97)   | 77.7%                    | 77.8%<br>(84/108)  | 61.97%                   | 76.6%<br>(82/107)  |
| 30-39      | 82.6%                    | 87.9%<br>(94/107)  | 87.0%                    | 88.3%<br>(98/111)  | 84.4%                    | 84.8%<br>(95/112)  | 78.79%                   | 87.4%<br>(90/103)  |
| 40-49      | 79.4%                    | 93.3%<br>(98/105)  | 84.1%                    | 95.3%<br>(101/106) | 81.4%                    | 84.1%<br>(90/107)  | 75.91%                   | 80.0%<br>(84/105)  |
| 50-59      | 45.4%                    | 48.0%<br>(48/100)  | 47.7%                    | 55.1%<br>(59/107)  | 52.7%                    | 44.4%<br>(44/99)   | 49.61%                   | 60.7%<br>(65/107)  |
| ≥60        | 8.9%                     | 2.9%<br>(6/208)    | 4.3%                     | 3.4%<br>(7/203)    | 8.6%                     | 8.3%<br>(17/204)   | 7.56%                    | 8.3%<br>(17/204)   |

a Refers to urban areas of Hubei province(43).

b Refers to Shanghai City(44).

c Refers to urban areas of Guangdong province(45).

d Refers to urban areas of Hunan province(46).

### 3. Contact patterns

#### 3.1 Descriptive characteristics of contact patterns

Fig. S3 shows the average number of daily contacts (including physical contacts and conversational contacts) by 5-year age groups. We observed that in the baseline non-epidemic period, Shanghai residents report more contacts than Wuhan, Shenzhen, and Changsha. In these four cities, the average number of contacts per participant was significantly reduced during the COVID-19 outbreak and this was consistent across all age groups. During the outbreak, the number of contacts was similarly low in the four cities (2-3 contacts/day) and age differences essentially disappeared. Compared with the outbreak period, the average number of contacts per participant were increased during the post-lockdown period, primarily focusing on work-age participants. During the post-lockdown period, Wuhan recorded more contacts (3-4 contacts/day) than other three cities. The contact survey during the post-lockdown period was conducted both on weekdays and weekends. Compared with weekdays, participants reported almost equal or lower number of contacts on weekends. The distributions of contacts, including the median and interquartile ranges (IQR) and the distribution by day type, are reported in Fig. S4-S7 and Tab. S7-14.

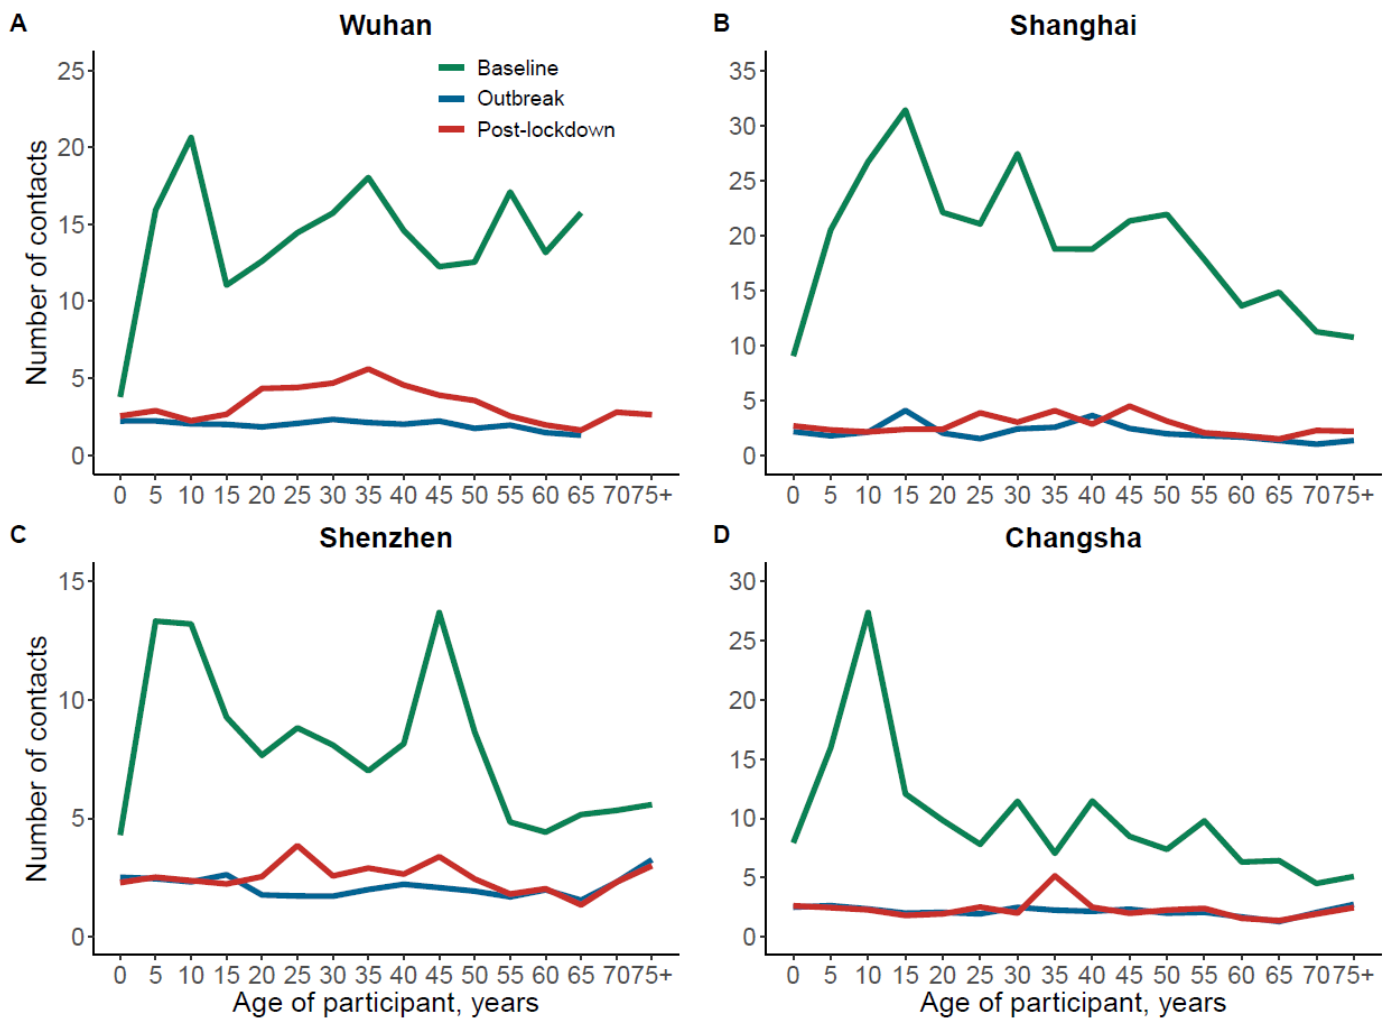

**Figure S3.** Average daily number of reported contacts in four large cities (A-D: Wuhan City, Shanghai City, Shenzhen City, and Changsha City), by period (baseline, COVID-19 outbreak, and post-lockdown period).

i. Wuhan

**Table S7. Median number of reported contacts by respondent characteristics and time period for Wuhan.**

| Characteristics                    | Baseline period |               | Outbreak period |              | Post-lockdown period |              |
|------------------------------------|-----------------|---------------|-----------------|--------------|----------------------|--------------|
|                                    | N (%)           | Median (IQR)  | N (%)           | Median (IQR) | N (%)                | Median (IQR) |
| Overall                            | 624 (100.0)     | 7 (3, 15)     | 627 (100.0)     | 2 (1, 2)     | 822 (100.0)          | 2 (2, 4)     |
| <b>Sex</b>                         |                 |               |                 |              |                      |              |
| Male                               | 300 (48.1)      | 6 (2, 18)     | 301 (48)        | 2 (1, 2)     | 384 (46.7)           | 2 (2, 3.2)   |
| Female                             | 324 (51.9)      | 7.5 (3, 15)   | 326 (52)        | 2 (2, 2)     | 438 (53.3)           | 2 (2, 4)     |
| <b>Age group</b>                   |                 |               |                 |              |                      |              |
| 0-6 y                              | 12 (1.9)        | 4.5 (2, 6.5)  | 12 (1.9)        | 2 (2, 2)     | 81 (9.9)             | 2 (2, 3)     |
| 7-19 y                             | 79 (12.7)       | 9 (5, 23.5)   | 79 (12.6)       | 2 (2, 2)     | 123 (15)             | 2 (2, 3)     |
| 20-39 y                            | 254 (40.7)      | 7 (3, 19)     | 256 (40.8)      | 2 (1, 2.2)   | 206 (25.1)           | 3 (2, 5)     |
| 40-59 y                            | 221 (35.4)      | 6 (2, 13)     | 220 (35.1)      | 2 (1, 2)     | 204 (24.8)           | 3 (2, 4)     |
| ≥60 y                              | 58 (9.3)        | 3.5 (1, 11.8) | 60 (9.6)        | 1 (1, 2)     | 208 (25.3)           | 2 (1, 3)     |
| <b>Type of profession</b>          |                 |               |                 |              |                      |              |
| Pre-school                         | 12 (1.9)        | 4.5 (2, 6.5)  | 12 (1.9)        | 2 (2, 2)     | 79 (9.6)             | 2 (2, 3)     |
| Student                            | 107 (17.1)      | 8 (3.5, 14)   | 107 (17.1)      | 2 (2, 2)     | 134 (16.3)           | 2 (2, 3)     |
| Employed                           | 391 (62.7)      | 8 (3, 19)     | 390 (62.2)      | 2 (1, 2)     | 327 (39.8)           | 3 (2, 5)     |
| Working-age not in the labor force | 30 (4.8)        | 4 (2, 7.5)    | 31 (4.9)        | 2 (1, 2)     | 34 (4.1)             | 2 (2, 4)     |
| Retired                            | 84 (13.5)       | 4 (1.8, 9.2)  | 87 (13.9)       | 1 (1, 2)     | 248 (30.2)           | 2 (1, 3)     |
| <b>Household size</b>              |                 |               |                 |              |                      |              |
| 1                                  | 45 (7.2)        | 4 (1, 8)      | 45 (7.2)        | 0 (0, 0)     | 31 (3.8)             | 1 (0, 3)     |
| 2                                  | 73 (11.7)       | 5 (1, 11)     | 76 (12.1)       | 1 (1, 1)     | 153 (18.6)           | 1 (1, 2)     |
| 3                                  | 282 (45.2)      | 7.5 (3, 18.8) | 283 (45.1)      | 2 (2, 2)     | 408 (49.6)           | 2 (2, 3)     |
| 4                                  | 133 (21.3)      | 6 (3, 12)     | 132 (21.1)      | 2 (2, 3)     | 148 (18)             | 3 (3, 3)     |
| ≥5                                 | 91 (14.6)       | 10 (4, 26)    | 91 (14.5)       | 3 (2, 4)     | 82 (10)              | 4 (4, 5)     |

Percentages may not total 100 because of rounding.

**Table S8.** Number of reported contacts by respondent characteristics and day type for Wuhan during post-lockdown period.

| Characteristics                    | Overall     |                            | Weekday     |                            | Weekend     |                            |
|------------------------------------|-------------|----------------------------|-------------|----------------------------|-------------|----------------------------|
|                                    | N (%)       | Mean (95% CI) <sup>a</sup> | N (%)       | Mean (95% CI) <sup>a</sup> | N (%)       | Mean (95% CI) <sup>a</sup> |
| Overall                            | 822 (100.0) | 3.3 (3.1, 3.7)             | 649 (100.0) | 3.5 (3.1, 3.8)             | 173 (100.0) | 2.8 (2.6, 3)               |
| <b>Sex</b>                         |             |                            |             |                            |             |                            |
| Male                               | 384 (46.7)  | 3 (2.8, 3.3)               | 323 (49.8)  | 3.1 (2.8, 3.4)             | 61 (35.3)   | 2.8 (2.4, 3.1)             |
| Female                             | 438 (53.3)  | 3.6 (3.2, 4.2)             | 326 (50.2)  | 3.9 (3.3, 4.6)             | 112 (64.7)  | 2.8 (2.6, 3.1)             |
| <b>Age group</b>                   |             |                            |             |                            |             |                            |
| 0-6 y                              | 81 (9.9)    | 2.7 (2.5, 2.9)             | 64 (9.9)    | 2.7 (2.5, 3)               | 17 (9.8)    | 2.6 (2.3, 3.1)             |
| 7-19 y                             | 123 (15)    | 2.5 (2.3, 2.7)             | 84 (12.9)   | 2.5 (2.3, 2.8)             | 39 (22.5)   | 2.4 (2.1, 2.7)             |
| 20-39 y                            | 206 (25.1)  | 4.8 (3.9, 5.9)             | 161 (24.8)  | 5.3 (4.2, 6.6)             | 45 (26)     | 3 (2.6, 3.4)               |
| 40-59 y                            | 204 (24.8)  | 3.7 (3.2, 4.3)             | 151 (23.3)  | 4.1 (3.4, 4.8)             | 53 (30.6)   | 2.8 (2.4, 3.3)             |
| ≥60 y                              | 208 (25.3)  | 2.3 (2.1, 2.5)             | 189 (29.1)  | 2.2 (2, 2.4)               | 19 (11)     | 3 (2.5, 3.4)               |
| <b>Type of profession</b>          |             |                            |             |                            |             |                            |
| Pre-school                         | 79 (9.6)    | 2.7 (2.5, 2.9)             | 63 (9.7)    | 2.7 (2.4, 3)               | 16 (9.2)    | 2.6 (2.2, 3.1)             |
| Student                            | 134 (16.3)  | 2.5 (2.3, 2.7)             | 92 (14.2)   | 2.5 (2.3, 2.8)             | 42 (24.3)   | 2.5 (2.2, 2.8)             |
| Employed                           | 327 (39.8)  | 4.7 (4, 5.5)               | 260 (40.1)  | 5.1 (4.4, 6)               | 67 (38.7)   | 3 (2.6, 3.4)               |
| Working-age not in the labor force | 34 (4.1)    | 2.8 (2.4, 3.3)             | 22 (3.4)    | 2.7 (2.1, 3.3)             | 12 (6.9)    | 3.1 (2.4, 3.8)             |
| Retired                            | 248 (30.2)  | 2.3 (2.2, 2.5)             | 212 (32.7)  | 2.3 (2.1, 2.5)             | 36 (20.8)   | 2.7 (2.4, 3.1)             |
| <b>Household size</b>              |             |                            |             |                            |             |                            |
| 1                                  | 31 (3.8)    | 2.4 (1.2, 4)               | 29 (4.5)    | 2.5 (1.2, 4.2)             | 2 (1.2)     | 1.5 (0, 3)                 |
| 2                                  | 153 (18.6)  | 1.9 (1.5, 2.3)             | 136 (21)    | 1.8 (1.5, 2.3)             | 17 (9.8)    | 2.1 (1.3, 3.2)             |
| 3                                  | 408 (49.6)  | 3.4 (3, 3.9)               | 310 (47.8)  | 3.7 (3.2, 4.5)             | 98 (56.6)   | 2.5 (2.3, 2.8)             |
| 4                                  | 148 (18)    | 3.5 (3.3, 3.7)             | 113 (17.4)  | 3.6 (3.3, 3.9)             | 35 (20.2)   | 3.1 (2.9, 3.3)             |
| ≥5                                 | 82 (10)     | 5.8 (4.9, 7)               | 61 (9.4)    | 6.4 (5.1, 8)               | 21 (12.1)   | 4.2 (4, 4.4)               |

Percentages may not total 100 because of rounding.

<sup>a</sup>The 95% confidence interval on the mean are calculated by bootstrap sampling.



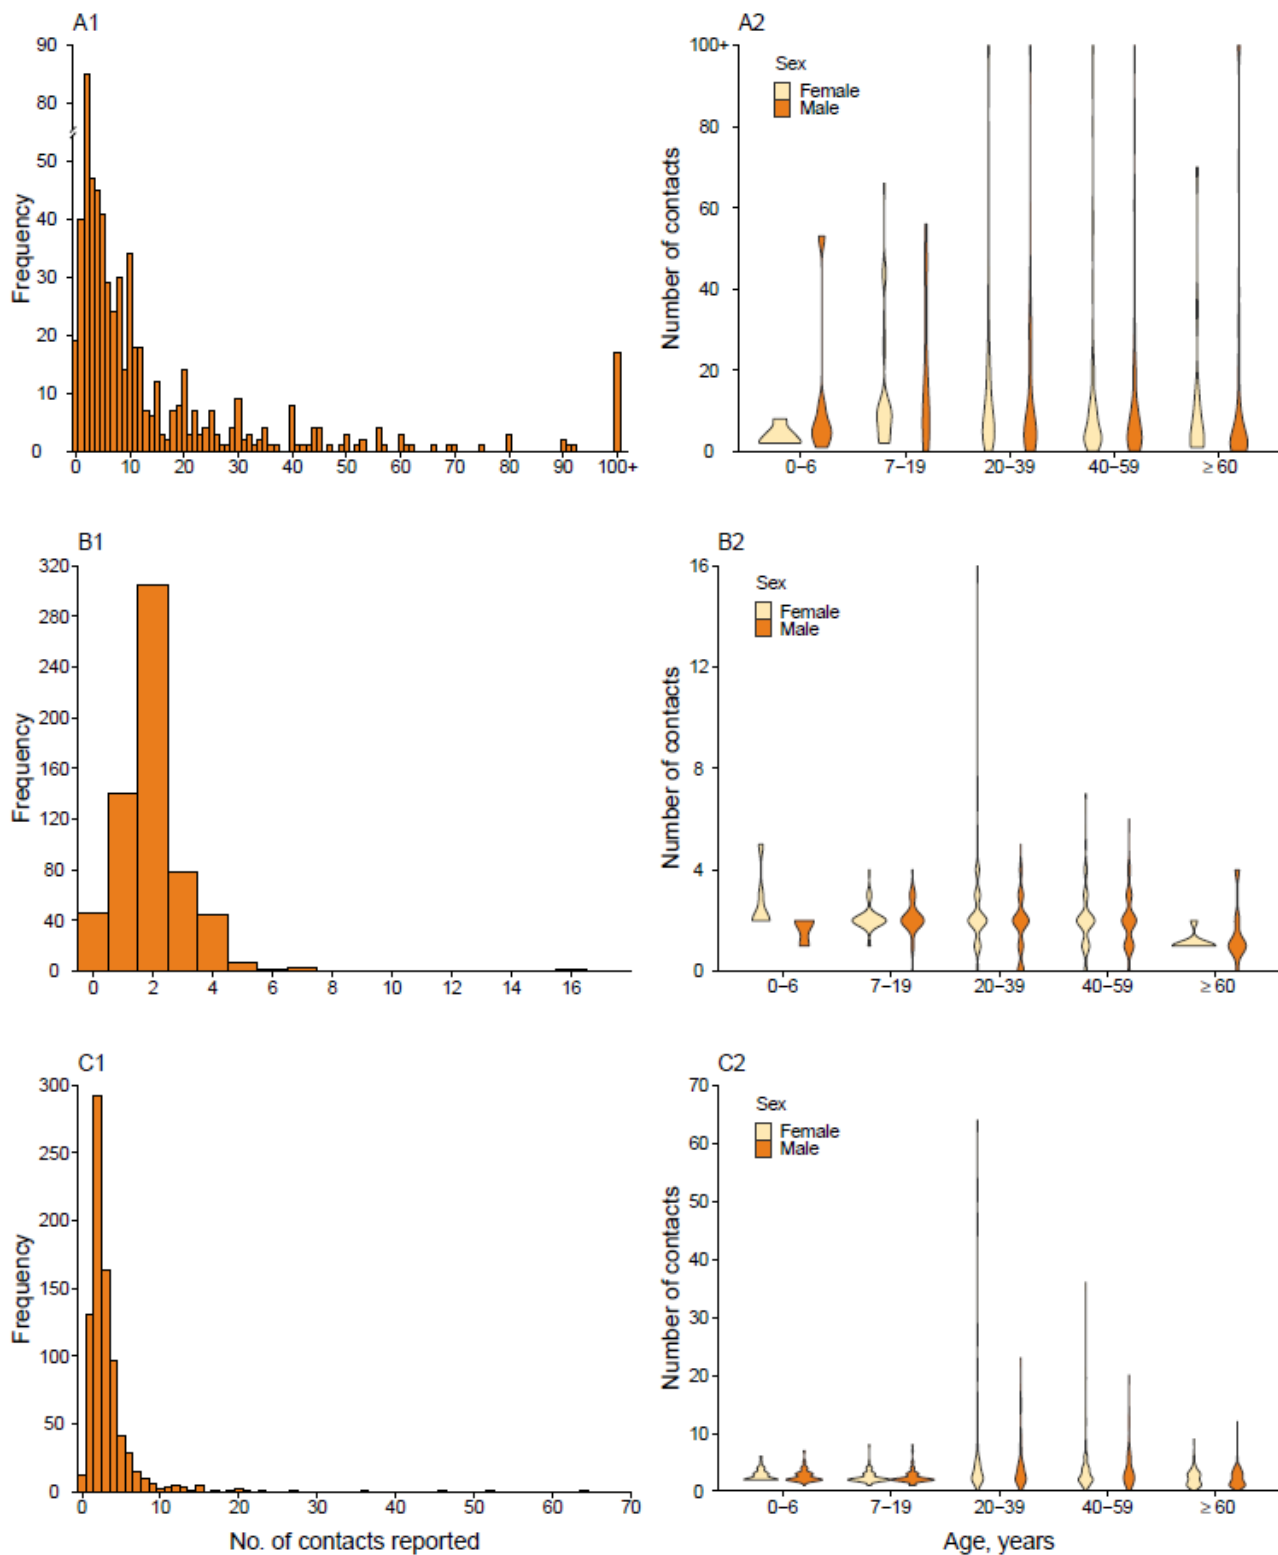

**Figure S4.** Distribution of number of contacts for Wuhan. *A1* Number of contacts reported during baseline period for Wuhan. *A2* Number of contacts reported by age group and sex during baseline period for Wuhan. *B1*, *B2* Same as *A1* and *A2*, but for the period of COVID-19 outbreak. *C1*, *C2* Same as *A1* and *A2*, but for the period of post-lockdown. Number of contacts were censored by 100.

ii. *Shanghai*

**Table S9.** Median number of reported contacts by respondent characteristics and time period for Shanghai.

| Characteristics                    | Baseline period |                | Outbreak period |              | Post-lockdown period |              |
|------------------------------------|-----------------|----------------|-----------------|--------------|----------------------|--------------|
|                                    | N (%)           | Median (IQR)   | N (%)           | Median (IQR) | N (%)                | Median (IQR) |
| Overall                            | 965 (100.0)     | 10 (4, 30)     | 557 (100.0)     | 2 (1, 3)     | 814 (100.0)          | 2 (1, 3)     |
| <b>Sex</b>                         |                 |                |                 |              |                      |              |
| Male                               | 474 (49.1)      | 10 (4.2, 31)   | 286 (51.3)      | 2 (1, 2.8)   | 400 (49.1)           | 2 (1, 3)     |
| Female                             | 491 (50.9)      | 10 (4, 29.5)   | 271 (48.7)      | 2 (1, 3)     | 414 (50.9)           | 2 (1.2, 3)   |
| <b>Age group</b>                   |                 |                |                 |              |                      |              |
| 0-6 y                              | 88 (9.1)        | 5 (4, 15.2)    | 14 (2.5)        | 2 (2, 2)     | 63 (7.7)             | 2 (2, 3)     |
| 7-19 y                             | 141 (14.6)      | 28 (6, 40)     | 55 (9.9)        | 2 (2, 3)     | 136 (16.7)           | 2 (2, 3)     |
| 20-39 y                            | 236 (24.5)      | 12.5 (5, 34)   | 254 (45.6)      | 2 (1, 3)     | 203 (24.9)           | 2 (2, 3.5)   |
| 40-59 y                            | 233 (24.1)      | 12 (5, 31)     | 160 (28.7)      | 2 (1, 3)     | 209 (25.7)           | 2 (1, 4)     |
| ≥60 y                              | 267 (27.7)      | 6 (4, 16)      | 74 (13.3)       | 1 (1, 2)     | 203 (24.9)           | 2 (1, 3)     |
| <b>Type of profession</b>          |                 |                |                 |              |                      |              |
| Pre-school                         | 79 (8.2)        | 5 (4, 11)      | 14 (2.5)        | 2 (2, 2)     | 46 (5.7)             | 2 (2, 3)     |
| Student                            | 173 (17.9)      | 28 (6, 39)     | 71 (12.7)       | 2 (2, 3)     | 164 (20.1)           | 2 (2, 3)     |
| Employed                           | 400 (41.5)      | 14 (6, 34)     | 354 (63.6)      | 2 (1, 3)     | 336 (41.3)           | 2 (1.8, 4)   |
| Working-age not in the labor force | 29 (3)          | 6 (3, 13)      | 24 (4.3)        | 2 (0.8, 3)   | 36 (4.4)             | 2 (2, 3)     |
| Retired                            | 278 (28.8)      | 6 (3, 15)      | 94 (16.9)       | 1 (1, 2)     | 232 (28.5)           | 2 (1, 3)     |
| <b>Household size</b>              |                 |                |                 |              |                      |              |
| 1                                  | 35 (3.6)        | 10 (3.5, 22.5) | 61 (11)         | 0 (0, 0)     | 57 (7)               | 0 (0, 0)     |
| 2                                  | 244 (25.3)      | 7 (3.8, 19)    | 138 (24.8)      | 1 (1, 1)     | 156 (19.2)           | 1 (1, 1)     |
| 3                                  | 432 (44.8)      | 12 (5, 32)     | 216 (38.8)      | 2 (2, 2)     | 406 (49.9)           | 2 (2, 2)     |
| 4                                  | 117 (12.1)      | 10 (4, 33)     | 78 (14)         | 3 (3, 3)     | 122 (15)             | 3 (3, 3)     |
| ≥5                                 | 137 (14.2)      | 12 (5, 33)     | 64 (11.5)       | 4 (4, 4.2)   | 73 (9)               | 4 (4, 4)     |

Percentages may not total 100 because of rounding.

**Table S10.** Number of reported contacts by respondent characteristics and day type for Shanghai during post-lockdown period.

| Characteristics                    | Overall     |                            | Weekday     |                            | Weekend     |                            |
|------------------------------------|-------------|----------------------------|-------------|----------------------------|-------------|----------------------------|
|                                    | N (%)       | Mean (95% CI) <sup>a</sup> | N (%)       | Mean (95% CI) <sup>a</sup> | N (%)       | Mean (95% CI) <sup>a</sup> |
| Overall                            | 814 (100.0) | 2.7 (2.5, 3)               | 706 (100.0) | 2.7 (2.5, 3.1)             | 108 (100.0) | 2.8 (2.4, 3.2)             |
| <b>Sex</b>                         |             |                            |             |                            |             |                            |
| Male                               | 400 (49.1)  | 2.6 (2.4, 2.9)             | 350 (49.6)  | 2.5 (2.3, 2.8)             | 50 (46.3)   | 3.1 (2.4, 3.9)             |
| Female                             | 414 (50.9)  | 2.9 (2.5, 3.4)             | 356 (50.4)  | 2.9 (2.4, 3.5)             | 58 (53.7)   | 2.5 (2.1, 2.9)             |
| <b>Age group</b>                   |             |                            |             |                            |             |                            |
| 0-6 y                              | 63 (7.7)    | 2.5 (2.3, 2.7)             | 50 (7.1)    | 2.4 (2.2, 2.7)             | 13 (12)     | 2.8 (2.2, 3.5)             |
| 7-19 y                             | 136 (16.7)  | 2.3 (2.1, 2.4)             | 122 (17.3)  | 2.3 (2.1, 2.4)             | 14 (13)     | 2.1 (1.7, 2.5)             |
| 20-39 y                            | 203 (24.9)  | 3.5 (2.8, 4.4)             | 180 (25.5)  | 3.6 (2.8, 4.5)             | 23 (21.3)   | 3.1 (2.1, 4.3)             |
| 40-59 y                            | 209 (25.7)  | 3.1 (2.6, 3.8)             | 181 (25.6)  | 3.1 (2.5, 3.8)             | 28 (25.9)   | 3.4 (2.6, 4.5)             |
| ≥60 y                              | 203 (24.9)  | 2 (1.8, 2.1)               | 173 (24.5)  | 1.9 (1.8, 2.1)             | 30 (27.8)   | 2.1 (1.7, 2.6)             |
| <b>Type of profession</b>          |             |                            |             |                            |             |                            |
| Pre-school                         | 46 (5.7)    | 2.6 (2.3, 2.9)             | 36 (5.1)    | 2.5 (2.2, 2.8)             | 10 (9.3)    | 3 (2.4, 3.6)               |
| Student                            | 164 (20.1)  | 2.2 (2.1, 2.4)             | 147 (20.8)  | 2.2 (2.1, 2.4)             | 17 (15.7)   | 2.4 (1.9, 3)               |
| Employed                           | 336 (41.3)  | 3.6 (3, 4.2)               | 296 (41.9)  | 3.6 (3, 4.3)               | 40 (37)     | 3.5 (2.8, 4.5)             |
| Working-age not in the labor force | 36 (4.4)    | 2.5 (2.1, 3)               | 33 (4.7)    | 2.6 (2.2, 3.1)             | 3 (2.8)     | 1.7 (1, 2)                 |
| Retired                            | 232 (28.5)  | 1.9 (1.8, 2.1)             | 194 (27.5)  | 1.9 (1.7, 2.1)             | 38 (35.2)   | 2.1 (1.8, 2.5)             |
| <b>Household size</b>              |             |                            |             |                            |             |                            |
| 1                                  | 57 (7)      | 0.5 (0.2, 0.9)             | 53 (7.5)    | 0.6 (0.3, 1)               | 4 (3.7)     | 0 (0, 0)                   |
| 2                                  | 156 (19.2)  | 1.4 (1.2, 1.6)             | 132 (18.7)  | 1.3 (1.1, 1.6)             | 24 (22.2)   | 1.6 (1.2, 2.1)             |
| 3                                  | 406 (49.9)  | 2.7 (2.4, 3.2)             | 356 (50.4)  | 2.7 (2.4, 3.2)             | 50 (46.3)   | 2.7 (2.3, 3.3)             |
| 4                                  | 122 (15)    | 4.2 (3.6, 5)               | 114 (16.1)  | 4.2 (3.5, 5)               | 8 (7.4)     | 4.4 (2.6, 6.6)             |
| ≥5                                 | 73 (9)      | 5 (4.1, 6.5)               | 51 (7.2)    | 5.5 (4.2, 7.6)             | 22 (20.4)   | 4 (3.5, 4.5)               |

Percentages may not total 100 because of rounding.

<sup>a</sup>The 95% confidence interval on the mean are calculated by bootstrap sampling.

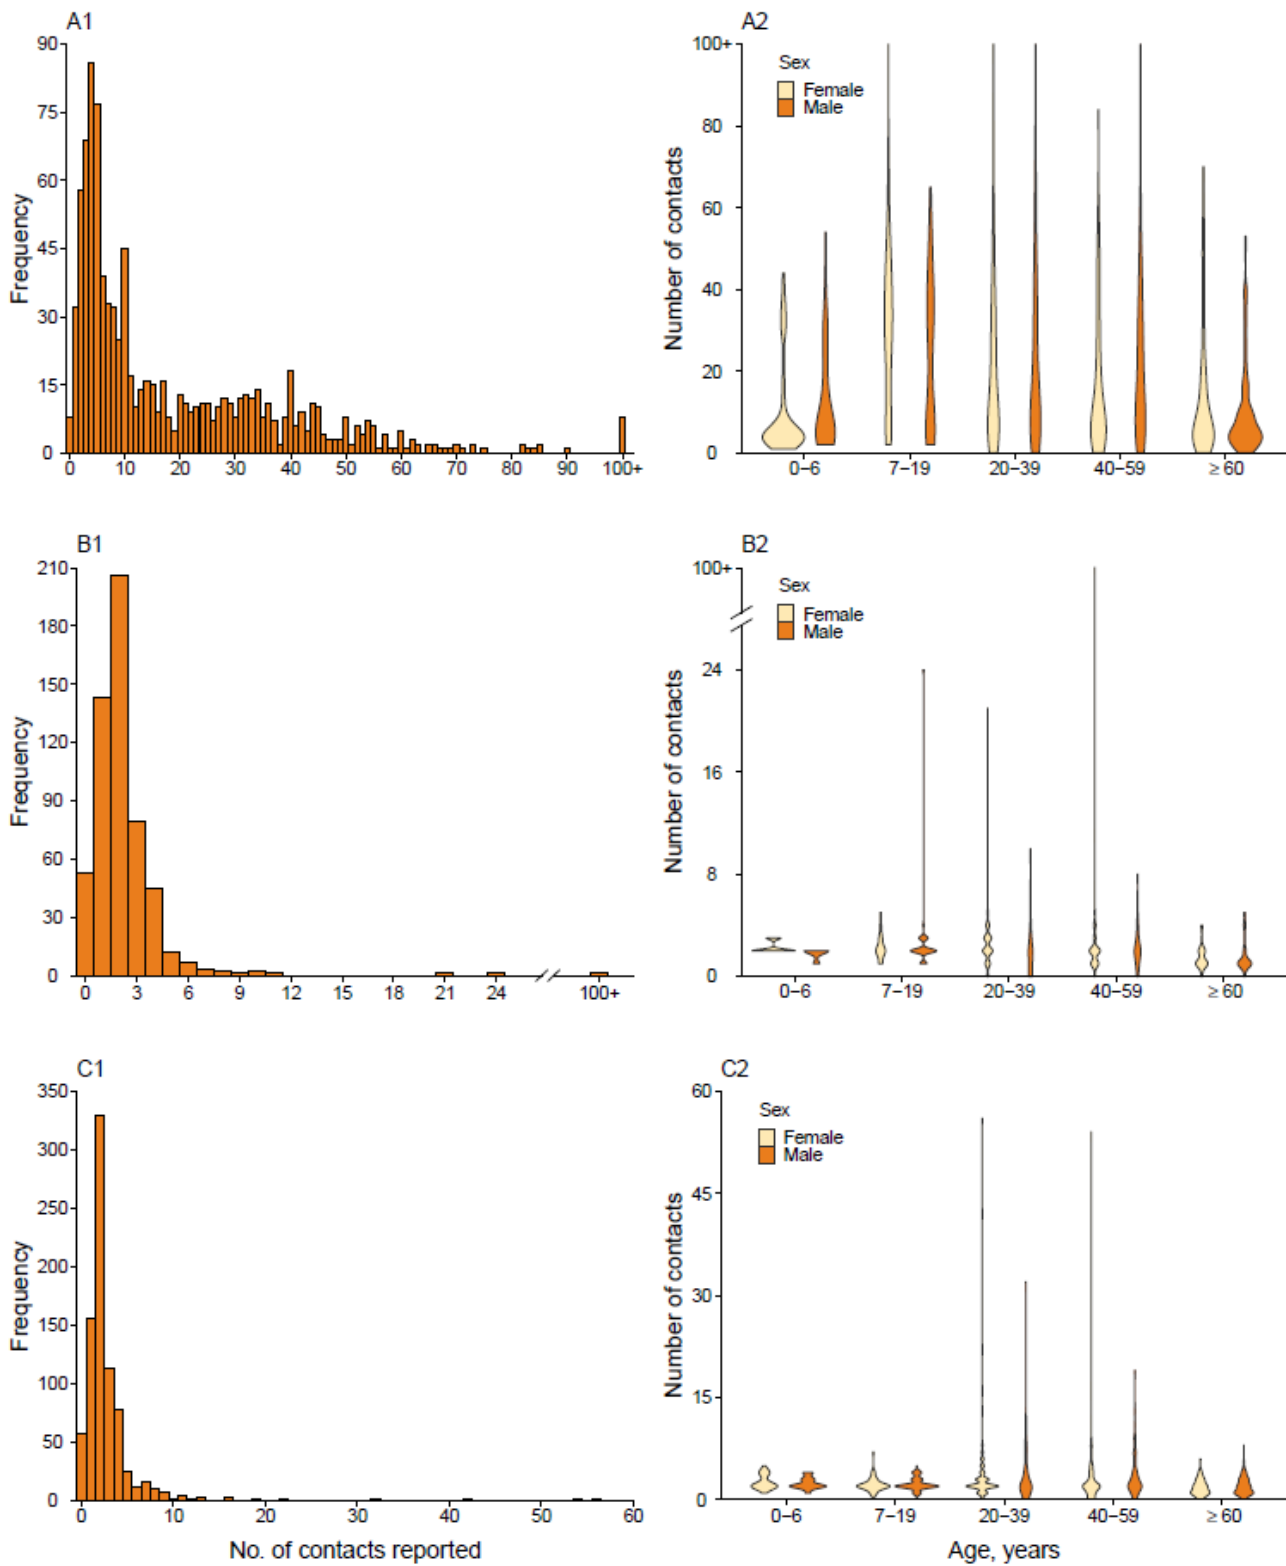

**Figure S5.** Distribution of number of contacts for Shanghai. **A1** Number of contacts reported during baseline period for Shanghai. **A2** Number of contacts reported by age group and sex during baseline period for Shanghai. **B1, B2** Same as A1 and A2, but for the period of COVID-19 outbreak. **C1, C2** Same as A1 and A2, but for the period of post-lockdown. Number of contacts were censored by 100.

iii. *Shenzhen*

**Table S11.** Median number of reported contacts by respondent characteristics and time period for Shenzhen.

| Characteristics                    | Baseline period |              | Outbreak period |              | Post-lockdown period |              |
|------------------------------------|-----------------|--------------|-----------------|--------------|----------------------|--------------|
|                                    | N (%)           | Median (IQR) | N (%)           | Median (IQR) | N (%)                | Median (IQR) |
| Overall                            | 741 (100.0)     | 5 (3, 10)    | 836 (100.0)     | 2 (1, 3)     | 837 (100.0)          | 2 (1, 3)     |
| <b>Sex</b>                         |                 |              |                 |              |                      |              |
| Male                               | 371 (50.1)      | 6 (3, 11)    | 419 (50.1)      | 2 (1, 3)     | 420 (50.2)           | 2 (1, 3)     |
| Female                             | 370 (49.9)      | 5 (2, 9)     | 417 (49.9)      | 2 (1, 3)     | 417 (49.8)           | 2 (1, 3)     |
| <b>Age group</b>                   |                 |              |                 |              |                      |              |
| 0-6 y                              | 51 (6.9)        | 4 (2, 8)     | 53 (6.3)        | 2 (2, 3)     | 53 (6.3)             | 2 (2, 3)     |
| 7-19 y                             | 128 (17.3)      | 8.5 (5, 13)  | 161 (19.3)      | 2 (2, 3)     | 160 (19.1)           | 2 (2, 3)     |
| 20-39 y                            | 190 (25.6)      | 6 (3, 11)    | 215 (25.7)      | 2 (1, 2)     | 216 (25.8)           | 2 (1, 3.2)   |
| 40-59 y                            | 176 (23.8)      | 5 (3, 10)    | 204 (24.4)      | 2 (1, 2)     | 205 (24.5)           | 2 (1, 3)     |
| ≥60 y                              | 196 (26.5)      | 4 (2, 7)     | 203 (24.3)      | 2 (1, 3)     | 203 (24.3)           | 2 (1, 3)     |
| <b>Type of profession</b>          |                 |              |                 |              |                      |              |
| Pre-school                         | 38 (5.1)        | 2 (2, 5)     | 38 (4.5)        | 2 (2, 3.8)   | 38 (4.5)             | 2 (2, 2)     |
| Student                            | 141 (19)        | 8 (5, 13)    | 174 (20.8)      | 2 (2, 3)     | 172 (20.5)           | 2 (2, 3)     |
| Employed                           | 275 (37.1)      | 7 (4, 12)    | 334 (40)        | 2 (1, 2)     | 337 (40.3)           | 2 (1, 4)     |
| Working-age not in the labor force | 64 (8.6)        | 3 (1.8, 5)   | 66 (7.9)        | 2 (1, 2)     | 66 (7.9)             | 2 (1, 2)     |
| Retired                            | 223 (30.1)      | 4 (2, 6)     | 224 (26.8)      | 2 (1, 3)     | 224 (26.8)           | 2 (1, 3)     |
| <b>Household size</b>              |                 |              |                 |              |                      |              |
| 1                                  | 102 (13.8)      | 3 (1, 7)     | 118 (14.1)      | 0 (0, 1)     | 118 (14.1)           | 0 (0, 1)     |
| 2                                  | 165 (22.3)      | 3 (1, 7)     | 186 (22.2)      | 1 (1, 1)     | 187 (22.3)           | 1 (1, 1)     |
| 3                                  | 307 (41.4)      | 6 (3, 11)    | 347 (41.5)      | 2 (2, 2)     | 345 (41.2)           | 2 (2, 2)     |
| 4                                  | 90 (12.1)       | 6.5 (4, 11)  | 99 (11.8)       | 3 (3, 3)     | 101 (12.1)           | 3 (3, 3)     |
| ≥5                                 | 77 (10.4)       | 7 (5, 11)    | 86 (10.3)       | 4 (4, 4)     | 86 (10.3)            | 4 (4, 5)     |

Percentages may not total 100 because of rounding.

**Table S12.** Number of reported contacts by respondent characteristics and day type for Shenzhen during post-lockdown period.

| Characteristics                    | Overall     |                            | Weekday     |                            | Weekend     |                            |
|------------------------------------|-------------|----------------------------|-------------|----------------------------|-------------|----------------------------|
|                                    | N (%)       | Mean (95% CI) <sup>a</sup> | N (%)       | Mean (95% CI) <sup>a</sup> | N (%)       | Mean (95% CI) <sup>a</sup> |
| Overall                            | 837 (100.0) | 2.5 (2.4, 2.7)             | 602 (100.0) | 2.6 (2.4, 2.9)             | 235 (100.0) | 2.3 (2.1, 2.5)             |
| <b>Sex</b>                         |             |                            |             |                            |             |                            |
| Male                               | 420 (50.2)  | 2.5 (2.3, 2.7)             | 271 (45)    | 2.6 (2.4, 3)               | 149 (63.4)  | 2.3 (2, 2.6)               |
| Female                             | 417 (49.8)  | 2.6 (2.3, 2.9)             | 331 (55)    | 2.7 (2.3, 3.1)             | 86 (36.6)   | 2.2 (1.9, 2.5)             |
| <b>Age group</b>                   |             |                            |             |                            |             |                            |
| 0-6 y                              | 53 (6.3)    | 2.5 (2.2, 2.8)             | 33 (5.5)    | 2.4 (2.1, 2.8)             | 20 (8.5)    | 2.5 (2, 3.2)               |
| 7-19 y                             | 160 (19.1)  | 2.3 (2.1, 2.7)             | 119 (19.8)  | 2.4 (2.1, 2.9)             | 41 (17.4)   | 2 (1.7, 2.3)               |
| 20-39 y                            | 216 (25.8)  | 3 (2.5, 3.6)               | 197 (32.7)  | 3 (2.5, 3.6)               | 19 (8.1)    | 2.5 (1.6, 3.6)             |
| 40-59 y                            | 205 (24.5)  | 2.6 (2.2, 3)               | 176 (29.2)  | 2.5 (2.2, 2.9)             | 29 (12.3)   | 2.8 (2, 4)                 |
| ≥60 y                              | 203 (24.3)  | 2.2 (2, 2.4)               | 77 (12.8)   | 2.4 (2, 2.8)               | 126 (53.6)  | 2.2 (1.9, 2.4)             |
| <b>Type of profession</b>          |             |                            |             |                            |             |                            |
| Pre-school                         | 38 (4.5)    | 2.4 (2.1, 2.9)             | 25 (4.2)    | 2.3 (2, 2.7)               | 13 (5.5)    | 2.7 (2.1, 3.7)             |
| Student                            | 172 (20.5)  | 2.4 (2.2, 2.8)             | 125 (20.8)  | 2.6 (2.3, 3)               | 47 (20)     | 2.1 (1.8, 2.4)             |
| Employed                           | 337 (40.3)  | 3 (2.6, 3.4)               | 285 (47.3)  | 3.1 (2.7, 3.6)             | 52 (22.1)   | 2.7 (2.1, 3.5)             |
| Working-age not in the labor force | 66 (7.9)    | 1.7 (1.4, 2.1)             | 61 (10.1)   | 1.7 (1.4, 2.1)             | 5 (2.1)     | 1.8 (0.6, 3.4)             |
| Retired                            | 224 (26.8)  | 2.2 (2, 2.4)               | 106 (17.6)  | 2.2 (1.9, 2.5)             | 118 (50.2)  | 2.1 (1.9, 2.4)             |
| <b>Household size</b>              |             |                            |             |                            |             |                            |
| 1                                  | 118 (14.1)  | 1 (0.6, 1.3)               | 98 (16.3)   | 1 (0.6, 1.4)               | 20 (8.5)    | 0.8 (0.2, 1.8)             |
| 2                                  | 187 (22.3)  | 1.9 (1.5, 2.4)             | 125 (20.8)  | 2.1 (1.5, 2.8)             | 62 (26.4)   | 1.5 (1.1, 2.1)             |
| 3                                  | 345 (41.2)  | 2.8 (2.6, 3.1)             | 251 (41.7)  | 3 (2.7, 3.5)               | 94 (40)     | 2.4 (2.2, 2.6)             |
| 4                                  | 101 (12.1)  | 3.1 (2.9, 3.3)             | 65 (10.8)   | 3.1 (2.9, 3.4)             | 36 (15.3)   | 3.1 (2.8, 3.3)             |
| ≥5                                 | 86 (10.3)   | 4.3 (4, 4.7)               | 63 (10.5)   | 4.3 (4, 4.8)               | 23 (9.8)    | 4.2 (3.7, 4.7)             |

Percentages may not total 100 because of rounding.

<sup>a</sup>The 95% confidence interval on the mean are calculated by bootstrap sampling.

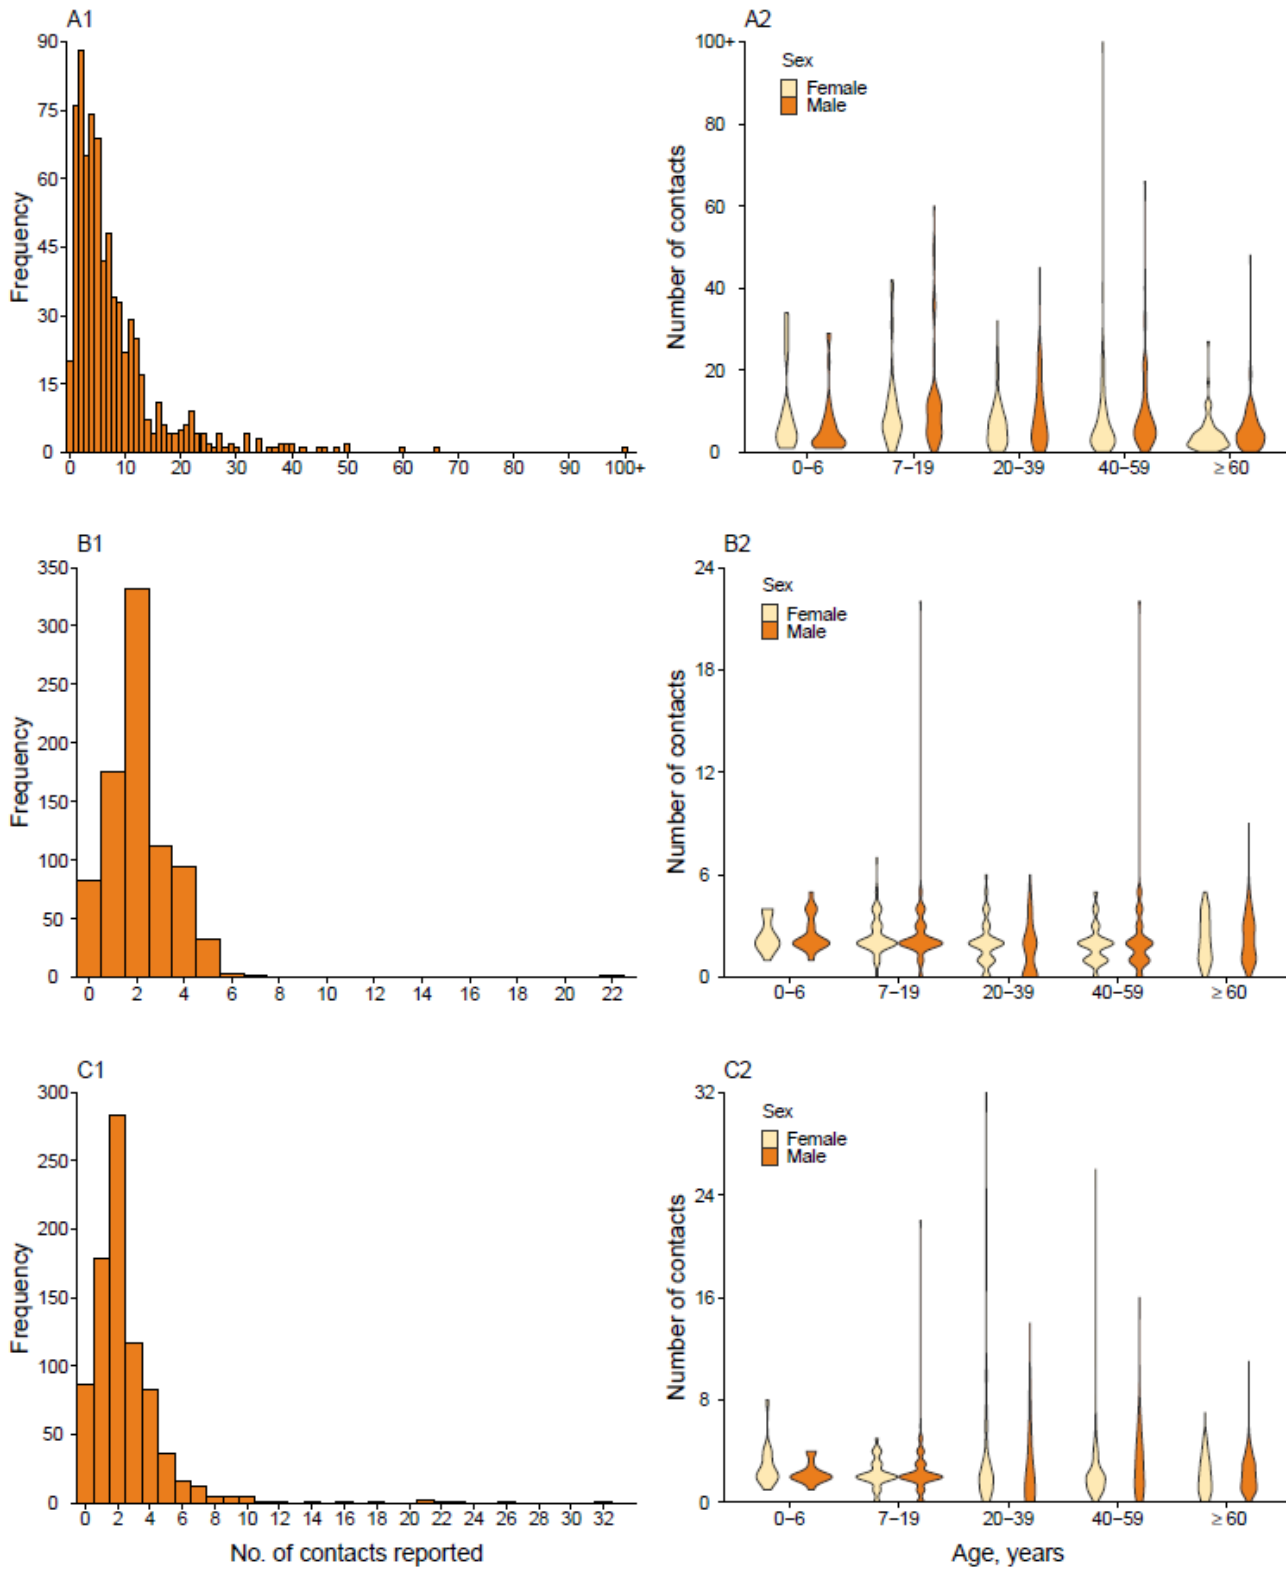

**Figure S6.** Distribution of number of contacts for Shenzhen. *A1* Number of contacts reported during baseline period for Shenzhen. *A2* Number of contacts reported by age group and sex during baseline period for Shenzhen. *B1*, *B2* Same as *A1* and *A2*, but for the period of COVID-19 outbreak. *C1*, *C2* Same as *A1* and *A2*, but for the period of post-lockdown. Number of contacts were censored by 100.

**Table S13.** Median number of reported contacts by respondent characteristics and time period for Changsha.

| Characteristics                    | Baseline period |               | Outbreak period |              | Post-lockdown period |              |
|------------------------------------|-----------------|---------------|-----------------|--------------|----------------------|--------------|
|                                    | N (%)           | Median (IQR)  | N (%)           | Median (IQR) | N (%)                | Median (IQR) |
| Overall                            | 738 (100.0)     | 5 (3, 11)     | 813 (100.0)     | 2 (1, 3)     | 832 (100.0)          | 2 (1, 3)     |
| <b>Sex</b>                         |                 |               |                 |              |                      |              |
| Male                               | 361 (48.9)      | 5 (3, 11)     | 398 (49)        | 2 (1, 3)     | 405 (48.7)           | 2 (1, 3)     |
| Female                             | 377 (51.1)      | 6 (3, 10)     | 415 (51)        | 2 (1, 3)     | 427 (51.3)           | 2 (1, 2)     |
| <b>Age group</b>                   |                 |               |                 |              |                      |              |
| 0-6 y                              | 60 (8.1)        | 4 (2, 15.2)   | 60 (7.4)        | 2 (2, 3.2)   | 60 (7.2)             | 2 (2, 4)     |
| 7-19 y                             | 119 (16.1)      | 9 (4, 19.5)   | 149 (18.3)      | 2 (2, 3)     | 150 (18)             | 2 (2, 2)     |
| 20-39 y                            | 188 (25.5)      | 5.5 (3, 10.2) | 198 (24.4)      | 2 (1, 3)     | 209 (25.1)           | 2 (1, 3)     |
| 40-59 y                            | 174 (23.6)      | 6 (3, 11)     | 205 (25.2)      | 2 (1, 3)     | 211 (25.4)           | 2 (1, 3)     |
| ≥60 y                              | 197 (26.7)      | 4 (2, 6)      | 201 (24.7)      | 2 (1, 3)     | 202 (24.3)           | 1 (1, 3)     |
| <b>Type of profession</b>          |                 |               |                 |              |                      |              |
| Pre-school                         | 43 (5.8)        | 4 (2, 6)      | 43 (5.3)        | 2 (2, 3.5)   | 43 (5.2)             | 2 (2, 4)     |
| Student                            | 142 (19.2)      | 9 (5, 20)     | 170 (20.9)      | 2 (2, 3)     | 171 (20.6)           | 2 (2, 2)     |
| Employed                           | 280 (37.9)      | 7 (3.8, 12)   | 329 (40.5)      | 2 (1, 3)     | 346 (41.6)           | 2 (1, 3)     |
| Working-age not in the labor force | 62 (8.4)        | 4 (2, 6)      | 63 (7.7)        | 2 (1, 2)     | 64 (7.7)             | 2 (1, 2)     |
| Retired                            | 211 (28.6)      | 4 (2, 6)      | 208 (25.6)      | 2 (1, 3)     | 208 (25)             | 1 (1, 3)     |
| <b>Household size</b>              |                 |               |                 |              |                      |              |
| 1                                  | 68 (9.2)        | 3 (1, 7.2)    | 78 (9.6)        | 0 (0, 1)     | 80 (9.6)             | 0 (0, 1)     |
| 2                                  | 184 (24.9)      | 4 (2, 7)      | 191 (23.5)      | 1 (1, 1)     | 194 (23.3)           | 1 (1, 1)     |
| 3                                  | 308 (41.7)      | 6 (3, 12.2)   | 342 (42.1)      | 2 (2, 2)     | 347 (41.7)           | 2 (2, 2)     |
| 4                                  | 110 (14.9)      | 7 (4, 12)     | 124 (15.3)      | 3 (3, 3)     | 128 (15.4)           | 3 (3, 3)     |
| ≥5                                 | 68 (9.2)        | 7.5 (4, 14)   | 78 (9.6)        | 4 (4, 4)     | 83 (10)              | 4 (4, 4)     |

Percentages may not total 100 because of rounding.



**Table S14.** Number of reported contacts by respondent characteristics and day type for Changsha during post-lockdown period.

| Characteristics                    | Overall     |                            | Weekday     |                            | Weekend     |                            |
|------------------------------------|-------------|----------------------------|-------------|----------------------------|-------------|----------------------------|
|                                    | N (%)       | Mean (95% CI) <sup>a</sup> | N (%)       | Mean (95% CI) <sup>a</sup> | N (%)       | Mean (95% CI) <sup>a</sup> |
| Overall                            | 832 (100.0) | 2.3 (2.1, 2.6)             | 628 (100.0) | 2.4 (2.1, 2.8)             | 204 (100.0) | 2.2 (2, 2.4)               |
| <b>Sex</b>                         |             |                            |             |                            |             |                            |
| Male                               | 405 (48.7)  | 2.6 (2.2, 3.2)             | 304 (48.4)  | 2.7 (2.2, 3.6)             | 101 (49.5)  | 2.3 (2, 2.7)               |
| Female                             | 427 (51.3)  | 2 (1.9, 2.2)               | 324 (51.6)  | 2.1 (1.9, 2.2)             | 103 (50.5)  | 2 (1.8, 2.3)               |
| <b>Age group</b>                   |             |                            |             |                            |             |                            |
| 0-6 y                              | 60 (7.2)    | 2.6 (2.3, 2.9)             | 52 (8.3)    | 2.5 (2.3, 2.8)             | 8 (3.9)     | 3.1 (2.2, 3.9)             |
| 7-19 y                             | 150 (18)    | 2.1 (1.9, 2.2)             | 124 (19.7)  | 2.1 (1.9, 2.3)             | 26 (12.7)   | 2 (1.8, 2.3)               |
| 20-39 y                            | 209 (25.1)  | 2.8 (2.1, 4)               | 166 (26.4)  | 3 (2.1, 4.5)               | 43 (21.1)   | 2.2 (1.6, 2.7)             |
| 40-59 y                            | 211 (25.4)  | 2.3 (2.1, 2.6)             | 121 (19.3)  | 2.4 (2, 2.8)               | 90 (44.1)   | 2.3 (2, 2.6)               |
| ≥60 y                              | 202 (24.3)  | 1.8 (1.7, 2)               | 165 (26.3)  | 1.9 (1.7, 2.1)             | 37 (18.1)   | 1.7 (1.3, 2.1)             |
| <b>Type of profession</b>          |             |                            |             |                            |             |                            |
| Pre-school                         | 43 (5.2)    | 2.6 (2.3, 3)               | 37 (5.9)    | 2.5 (2.2, 2.9)             | 6 (2.9)     | 3.2 (2.3, 4.2)             |
| Student                            | 171 (20.6)  | 2.2 (2, 2.3)               | 144 (22.9)  | 2.2 (2, 2.4)               | 27 (13.2)   | 2.1 (1.8, 2.3)             |
| Employed                           | 346 (41.6)  | 2.8 (2.3, 3.5)             | 229 (36.5)  | 3 (2.3, 4)                 | 117 (57.4)  | 2.3 (2, 2.7)               |
| Working-age not in the labor force | 64 (7.7)    | 1.9 (1.6, 2.2)             | 48 (7.6)    | 2 (1.6, 2.4)               | 16 (7.8)    | 1.6 (1.2, 2)               |
| Retired                            | 208 (25)    | 1.8 (1.6, 2)               | 170 (27.1)  | 1.8 (1.6, 2)               | 38 (18.6)   | 1.7 (1.4, 2.1)             |
| <b>Household size</b>              |             |                            |             |                            |             |                            |
| 1                                  | 80 (9.6)    | 0.7 (0.3, 1.2)             | 61 (9.7)    | 0.9 (0.4, 1.5)             | 19 (9.3)    | 0.4 (0.2, 0.6)             |
| 2                                  | 194 (23.3)  | 1.4 (1.2, 1.6)             | 141 (22.5)  | 1.4 (1.2, 1.6)             | 53 (26)     | 1.5 (1.2, 1.8)             |
| 3                                  | 347 (41.7)  | 2.3 (2.1, 2.4)             | 280 (44.6)  | 2.3 (2.1, 2.5)             | 67 (32.8)   | 2.2 (2, 2.5)               |
| 4                                  | 128 (15.4)  | 3.6 (2.7, 5.3)             | 87 (13.9)   | 4 (2.7, 6.5)               | 41 (20.1)   | 2.8 (2.4, 3.1)             |
| ≥5                                 | 83 (10)     | 4.2 (3.8, 4.7)             | 59 (9.4)    | 4.3 (3.9, 4.9)             | 24 (11.8)   | 3.8 (3.3, 4.5)             |

Percentages may not total 100 because of rounding.

<sup>a</sup>The 95% confidence interval on the mean are calculated by bootstrap sampling.

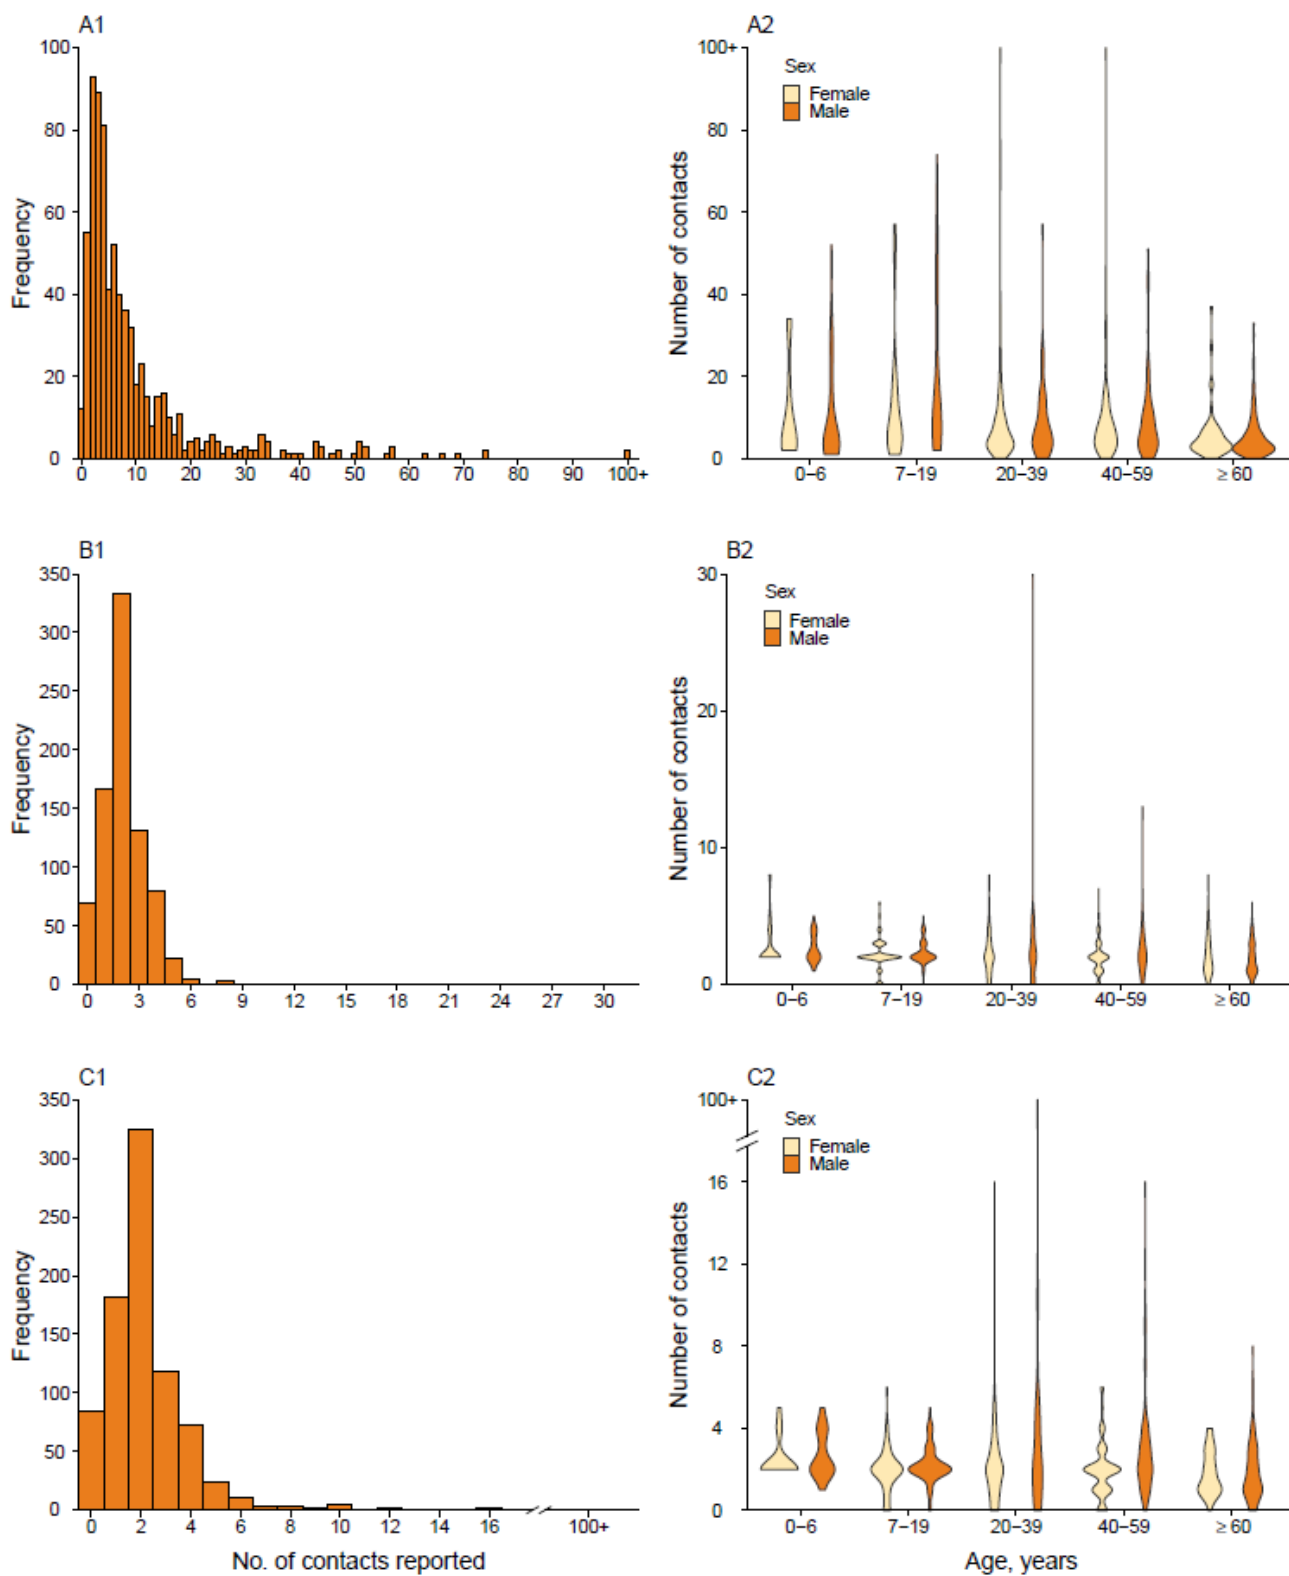

**Figure S7.** Distribution of number of contacts for Changsha. **A1** Number of contacts reported during baseline period for Changsha. **A2** Number of contacts reported by age group and sex during baseline period for Changsha. **B1, B2** Same as **A1** and **A2**, but for the period of COVID-19 outbreak. **C1, C2** Same as **A1** and **A2**, but for the period of post-lockdown. Number of contacts were censored by 100.

### 3.2 Comparison of contact patterns between locations

We analyzed the contact diaries for four locations and three time periods. Difference between the outbreak and post-lockdown periods was calculated by the subtraction of the number of contacts during the outbreak from the number of contacts during the post-lockdown period (Table 1). P-values were taken from a weighted negative binomial regression with a single binary variable distinguishing the post-lockdown period from the outbreak. Weights refer to the day type of the contact diary (i.e., weekday and weekend) during post-lockdown period. The same method was used for the difference among four locations (Table S15).

Participants in Shanghai and Changsha recorded more contacts during COVID-19 outbreak than participants in Wuhan, although the absolute difference between them is small (0.2-0.3 contacts per day). Moreover, during the outbreak, workers in Shanghai and retired people in Shenzhen and Changsha reported a larger number of contacts than those in Wuhan (Table S15). During post-lockdown period, Wuhan reported more contacts than other three cities, especially for workers.

**Table S15.** Number of contacts by location during the outbreak and the post-lockdown period.

| Characteristics                    | Outbreak, mean (95% CI) <sup>a</sup> |                   |                   |                   | Post-lockdown, mean (95% CI) <sup>a</sup> |                   |                   |                   |
|------------------------------------|--------------------------------------|-------------------|-------------------|-------------------|-------------------------------------------|-------------------|-------------------|-------------------|
|                                    | Wuhan                                | Shanghai          | Shenzhen          | Changsha          | Wuhan                                     | Shanghai          | Shenzhen          | Changsha          |
| Overall                            | 2 (1.9, 2.1)                         | 2.3 (2, 2.8)***   | 2.2 (2.1, 2.3)    | 2.2 (2.1, 2.3)*   | 3.3 (3, 3.6)                              | 2.7 (2.5, 3)***   | 2.5 (2.4, 2.7)*** | 2.3 (2.1, 2.6)*** |
| <b>Sex</b>                         |                                      |                   |                   |                   |                                           |                   |                   |                   |
| Male                               | 1.8 (1.7, 2)                         | 2.1 (1.9, 2.4)*   | 2.2 (2, 2.4)**    | 2.3 (2.1, 2.4)*** | 3 (2.8, 3.2)                              | 2.7 (2.4, 3)*     | 2.5 (2.3, 2.8)**  | 2.6 (2.2, 3.2)**  |
| Female                             | 2.1 (2, 2.3)                         | 2.6 (2.1, 3.4)**  | 2.1 (2, 2.2)      | 2.1 (1.9, 2.2)    | 3.6 (3.1, 4.1)                            | 2.8 (2.4, 3.2)*** | 2.5 (2.3, 2.8)*** | 2 (1.9, 2.2)***   |
| <b>Age group</b>                   |                                      |                   |                   |                   |                                           |                   |                   |                   |
| 0-6 y                              | 2.2 (1.8, 2.8)                       | 1.9 (1.6, 2.1)    | 2.5 (2.3, 2.8)    | 2.7 (2.4, 3)      | 2.7 (2.5, 2.9)                            | 2.5 (2.3, 2.8)    | 2.5 (2.2, 2.8)    | 2.7 (2.4, 3)      |
| 7-19 y                             | 2.1 (2, 2.2)                         | 2.6 (2, 3.4)      | 2.5 (2.2, 2.8)    | 2.2 (2.1, 2.4)    | 2.5 (2.3, 2.7)                            | 2.2 (2.1, 2.4)    | 2.3 (2, 2.6)      | 2.1 (1.9, 2.2)*   |
| 20-39 y                            | 2.1 (1.9, 2.2)                       | 2.2 (2, 2.5)      | 1.8 (1.6, 2)      | 2.2 (1.9, 2.6)    | 4.7 (3.8, 5.7)                            | 3.4 (2.8, 4.2)**  | 2.9 (2.4, 3.4)*** | 2.8 (2.1, 3.9)*** |
| 40-59 y                            | 2 (1.9, 2.1)                         | 2.8 (2, 4.2)***   | 2 (1.8, 2.3)      | 2.1 (1.9, 2.3)    | 3.7 (3.2, 4.2)                            | 3.2 (2.6, 3.8)    | 2.6 (2.3, 3.1)*** | 2.4 (2.1, 2.7)*** |
| ≥60 y                              | 1.4 (1.2, 1.7)                       | 1.6 (1.3, 1.9)    | 2.3 (2.1, 2.5)*** | 2 (1.8, 2.2)**    | 2.4 (2.2, 2.7)                            | 2 (1.8, 2.2)*     | 2.3 (2, 2.6)      | 1.8 (1.6, 2)***   |
| <b>Type of profession</b>          |                                      |                   |                   |                   |                                           |                   |                   |                   |
| Pre-school                         | 2.2 (1.7, 2.8)                       | 1.9 (1.7, 2.1)    | 2.6 (2.2, 2.9)    | 2.7 (2.3, 3.1)    | 2.7 (2.5, 2.9)                            | 2.6 (2.3, 2.9)    | 2.4 (2.1, 2.8)    | 2.7 (2.3, 3.1)    |
| Student                            | 2.1 (2, 2.3)                         | 2.5 (2, 3.2)      | 2.5 (2.3, 2.9)*   | 2.3 (2.2, 2.5)    | 2.5 (2.3, 2.7)                            | 2.3 (2.1, 2.5)    | 2.4 (2.2, 2.7)    | 2.2 (2, 2.3)      |
| Employed                           | 2.1 (1.9, 2.2)                       | 2.5 (2.1, 3.3)*** | 2 (1.8, 2.2)      | 2.2 (2, 2.4)      | 4.5 (3.9, 5.2)                            | 3.6 (3, 4.2)**    | 3 (2.6, 3.4)***   | 2.8 (2.3, 3.6)*** |
| Working-age not in the labor force | 1.8 (1.3, 2.4)                       | 1.8 (1.3, 2.3)    | 1.8 (1.5, 2.1)    | 2.1 (1.8, 2.4)    | 2.8 (2.3, 3.3)                            | 2.3 (1.9, 2.9)    | 1.8 (1.3, 2.3)*** | 1.9 (1.6, 2.2)**  |

| Characteristics | Outbreak, mean (95% CI) <sup>a</sup> |                   |                   |                 | Post-lockdown, mean (95% CI) <sup>a</sup> |                   |                  |                   |
|-----------------|--------------------------------------|-------------------|-------------------|-----------------|-------------------------------------------|-------------------|------------------|-------------------|
|                 | Wuhan                                | Shanghai          | Shenzhen          | Changsha        | Wuhan                                     | Shanghai          | Shenzhen         | Changsha          |
| Retired         | 1.5 (1.3, 1.7)                       | 1.6 (1.4, 1.8)    | 2.2 (2, 2.3)***   | 1.9 (1.7, 2.1)* | 2.4 (2.2, 2.6)                            | 2 (1.8, 2.1)**    | 2.2 (2, 2.4)     | 1.8 (1.6, 2)***   |
| Household size  |                                      |                   |                   |                 |                                           |                   |                  |                   |
| 1               | 0.6 (0.1, 1.4)                       | 0.3 (0.2, 0.5)    | 0.8 (0.6, 1.1)    | 1 (0.4, 1.9)    | 2.2 (1.1, 3.7)                            | 0.4 (0.2, 0.8)**  | 1 (0.6, 1.3)*    | 0.7 (0.3, 1.2)**  |
| 2               | 1.1 (0.9, 1.2)                       | 1.4 (1.1, 1.8)    | 1.3 (1.2, 1.4)    | 1.4 (1.2, 1.6)* | 1.9 (1.6, 2.3)                            | 1.4 (1.2, 1.7)*   | 1.9 (1.5, 2.5)   | 1.4 (1.2, 1.6)**  |
| 3               | 1.9 (1.8, 2)                         | 2.2 (2.1, 2.4)*   | 2.3 (2.1, 2.5)*** | 2.2 (2.1, 2.3)* | 3.4 (2.9, 3.9)                            | 2.7 (2.4, 3.1)*** | 2.8 (2.6, 3.1)** | 2.3 (2.1, 2.4)*** |
| 4               | 2.3 (2.2, 2.5)                       | 3 (2.8, 3.2)**    | 3.1 (2.9, 3.2)*** | 3 (2.8, 3.1)**  | 3.4 (3.2, 3.6)                            | 4.2 (3.5, 5.1)*   | 3.1 (2.9, 3.3)   | 3.7 (2.7, 5.4)    |
| ≥5              | 3.2 (2.9, 3.5)                       | 5.9 (3.9, 9.2)*** | 4.3 (4.1, 4.5)**  | 3.9 (3.7, 4.1)* | 5.7 (4.8, 6.8)                            | 5 (4.1, 6.7)*     | 4.3 (4, 4.6)**   | 4.2 (3.8, 4.6)*** |

Note that reduced denominators indicate missing data. Percentages may not total 100 because of rounding.

<sup>a</sup>The 95% confidence interval on the mean are calculated by bootstrap sampling and are weighted by day type (ie, weekday or weekend) for diaries during post-lockdown period.

\*p<0.05, \*\*p<0.01, \*\*\*p<0.001. P-values are taken from a weighted negative binomial regression with a single categorized variable distinguishing the surveyed locations with Wuhan as a reference. The weight refers to the day type (i.e., weekdays and weekends).

### 3.3 Physical contacts

We found that during the post-lockdown period, survey participants reported on average 1.4 (95%CI 1.4-1.5), 1.4 (95%CI 1.3-1.5), 1 (95%CI 0.9-1.1), and 1.2 (95%CI 1.2-1.3) physical contacts in Wuhan, Shanghai, Shenzhen, and Changsha, respectively. In Wuhan, the number of physical contacts increased 1.2-fold during the post-lockdown period ( $p < 0.01$ ), while no significant increase was found for Shanghai and Shenzhen. The number of physical contacts dropped for Changsha. Tab. S16 provides details on the number of physical contacts by characteristics of study participant, city and time period.

**Table S16.** Number of physical contacts for four locations.

| Characteristics                    | Wuhan, mean (95% CI) <sup>a</sup> |                  | Shanghai, mean (95% CI) <sup>a</sup> |                | Shenzhen, mean (95% CI) <sup>a</sup> |                | Changsha, mean (95% CI) <sup>a</sup> |                 |
|------------------------------------|-----------------------------------|------------------|--------------------------------------|----------------|--------------------------------------|----------------|--------------------------------------|-----------------|
|                                    | Outbreak                          | Post-lockdown    | Outbreak                             | Post-lockdown  | Outbreak                             | Post-lockdown  | Outbreak                             | Post-lockdown   |
| Overall                            | 1.2 (1.2, 1.3)                    | 1.4 (1.4, 1.5)** | 1.3 (1.2, 1.5)                       | 1.4 (1.3, 1.5) | 1.1 (1, 1.2)                         | 1 (0.9, 1.1)   | 1.4 (1.3, 1.5)                       | 1.2 (1.2, 1.3)* |
| Sex                                |                                   |                  |                                      |                |                                      |                |                                      |                 |
| Male                               | 1.2 (1.1, 1.3)                    | 1.4 (1.3, 1.5)*  | 1.3 (1.1, 1.5)                       | 1.4 (1.2, 1.6) | 1.2 (1, 1.3)                         | 1.1 (1, 1.2)   | 1.4 (1.3, 1.6)                       | 1.3 (1.2, 1.4)  |
| Female                             | 1.3 (1.2, 1.4)                    | 1.5 (1.4, 1.6)*  | 1.4 (1.2, 1.5)                       | 1.4 (1.3, 1.5) | 1.1 (1, 1.2)                         | 1 (0.8, 1.1)   | 1.3 (1.2, 1.5)                       | 1.2 (1.1, 1.3)  |
| Age group                          |                                   |                  |                                      |                |                                      |                |                                      |                 |
| 0-6 y                              | 1.8 (1.2, 2.5)                    | 2.5 (2.3, 2.7)   | 1.8 (1.4, 2.1)                       | 2.4 (2, 2.7)   | 2.3 (2, 2.6)                         | 2.1 (1.8, 2.3) | 2.5 (2.1, 2.8)                       | 2.4 (2.1, 2.7)  |
| 7-19 y                             | 1.3 (1.1, 1.5)                    | 1.6 (1.4, 1.8)   | 1.5 (0.9, 2.4)                       | 1.5 (1.3, 1.8) | 1.3 (1.1, 1.5)                       | 1.1 (0.9, 1.3) | 1.5 (1.3, 1.7)                       | 1.2 (1, 1.4)*   |
| 20-39 y                            | 1.3 (1.2, 1.5)                    | 1.6 (1.5, 1.8)** | 1.3 (1.2, 1.5)                       | 1.6 (1.4, 1.9) | 0.9 (0.8, 1.1)                       | 0.9 (0.7, 1.2) | 1.4 (1.2, 1.8)                       | 1.4 (1.2, 1.6)  |
| 40-59 y                            | 1.2 (1, 1.3)                      | 1.2 (1, 1.3)     | 1.3 (1.2, 1.5)                       | 1.4 (1.1, 1.6) | 1.2 (1, 1.4)                         | 1 (0.8, 1.2)   | 1.3 (1.1, 1.5)                       | 1.2 (1, 1.4)    |
| ≥60 y                              | 0.9 (0.6, 1.1)                    | 1 (0.8, 1.2)     | 1 (0.8, 1.2)                         | 0.8 (0.7, 1)   | 0.9 (0.7, 1)                         | 0.8 (0.6, 1)   | 1 (0.8, 1.1)                         | 0.8 (0.7, 1)    |
| Type of profession                 |                                   |                  |                                      |                |                                      |                |                                      |                 |
| Pre-school                         | 1.8 (1.2, 2.6)                    | 2.5 (2.3, 2.7)   | 1.8 (1.4, 2.1)                       | 2.4 (2.1, 2.8) | 2.4 (2, 2.8)                         | 2.1 (1.7, 2.4) | 2.6 (2.2, 3)                         | 2.4 (2.1, 2.8)  |
| Student                            | 1.3 (1.1, 1.5)                    | 1.6 (1.4, 1.8)*  | 1.5 (1, 2.3)                         | 1.7 (1.4, 1.9) | 1.4 (1.2, 1.6)                       | 1.2 (1.1, 1.4) | 1.7 (1.5, 1.9)                       | 1.4 (1.2, 1.6)* |
| Employed                           | 1.3 (1.2, 1.4)                    | 1.5 (1.3, 1.6)   | 1.4 (1.2, 1.5)                       | 1.5 (1.3, 1.7) | 1.1 (1, 1.2)                         | 1 (0.8, 1.2)   | 1.4 (1.2, 1.6)                       | 1.3 (1.1, 1.5)  |
| Working-age not in the labor force | 1.5 (1, 2)                        | 1.5 (1.1, 2)     | 1.5 (1, 2)                           | 1.4 (1, 1.8)   | 0.9 (0.7, 1.1)                       | 0.8 (0.6, 1)   | 1.2 (1, 1.5)                         | 1.1 (0.8, 1.3)  |
| Retired                            | 0.8 (0.6, 1)                      | 0.9 (0.8, 1.1)   | 1 (0.8, 1.2)                         | 0.9 (0.8, 1.1) | 0.8 (0.7, 1)                         | 0.7 (0.6, 0.9) | 0.9 (0.8, 1.1)                       | 0.8 (0.7, 1)    |
| Household size                     |                                   |                  |                                      |                |                                      |                |                                      |                 |
| 1                                  | 0.1 (0, 0.4)                      | 0.2 (0, 0.5)     | 0.2 (0, 0.4)                         | 0.1 (0, 0.2)   | 0.2 (0.1, 0.3)                       | 0.1 (0, 0.3)   | 0.7 (0.2, 1.6)                       | 0.4 (0.1, 0.8)  |
| 2                                  | 0.6 (0.4, 0.7)                    | 0.6 (0.5, 0.7)   | 0.7 (0.6, 0.7)                       | 0.7 (0.5, 0.9) | 0.6 (0.5, 0.7)                       | 0.8 (0.5, 1.2) | 0.8 (0.7, 0.9)                       | 0.7 (0.6, 0.7)  |
| 3                                  | 1.3 (1.2, 1.4)                    | 1.5 (1.4, 1.5)*  | 1.3 (1.2, 1.5)                       | 1.4 (1.3, 1.5) | 1.3 (1.2, 1.4)                       | 1.2 (1, 1.3)   | 1.4 (1.3, 1.5)                       | 1.3 (1.2, 1.4)  |
| 4                                  | 1.3 (1.1, 1.5)                    | 1.7 (1.5, 1.9)** | 2 (1.7, 2.2)                         | 1.9 (1.5, 2.3) | 1.6 (1.3, 1.9)                       | 1.4 (1.1, 1.7) | 1.8 (1.6, 2)                         | 1.6 (1.3, 1.8)  |
| ≥5                                 | 2.1 (1.8, 2.5)                    | 2.7 (2.3, 3)*    | 3 (2.3, 3.8)                         | 2.8 (2.4, 3.2) | 2.3 (2, 2.7)                         | 2 (1.6, 2.3)   | 2.8 (2.4, 3.1)                       | 2.7 (2.3, 3.1)  |

Percentages may not total 100 because of rounding.

<sup>a</sup>The 95% confidence interval on the mean are calculated by bootstrap sampling and are weighted by day type (ie, weekday or weekend) for diaries during the post-lockdown period.

\* $p < 0.05$ , \*\* $p < 0.01$ , \*\*\* $p < 0.001$ . P-values are taken from a weighted negative binomial regression with a single binary variable distinguishing the post-lockdown period from the outbreak period. The weight refers to day type (i.e., weekdays and weekends)

### 3.4 Contacts by setting

We also estimated the change of the number of contacts under different social settings (Tab. S17-S20). The number of contacts by setting at baseline period is not available for Wuhan, so only outbreak and post-lockdown periods were presented for Wuhan. Compared with the baseline number of contacts, 10.3% of contacts at workplace and 3.4% of contacts in the community ( “community” includes all contact settings other than household, workplace, and school) have been resumed during the post-lockdown period in Shanghai; 23% of contacts at workplace and 12.5% of contacts in the community have been resumed in Shenzhen; and 13% of contacts at workplace and 5.6% of contacts in the community have also been resumed in Changsha. Contacts within household didn’t change much over time.

We observed a low proportion of contacts at workplace were resumed as workplaces have been gradually resuming their operations (Tab. S1). We found that out of the workers who made zero contacts on weekdays during the post-lockdown period, 78.2% (115/147) either worked from home or have not resumed their work in Wuhan. The same high proportions (82.8% (192/232), 84.2% (154/183), and 78.7% (148/188)) were also found for Shanghai, Shenzhen, and Changsha, respectively.

We also analyzed the contacts between the outbreak period and the post-lockdown period by participant age group (Fig. S8). Compared with the outbreak period, 65+ years in Wuhan and Shanghai reported more contacts within household during the post-lockdown period, while other age groups and other survey cities reported similar household contacts. Work-age participants in the four cities all reported more contacts at workplace, especially in Wuhan. More community contacts were made during the post-lockdown period for Wuhan, while not much change was observed for other three cities.

**Table S17.** *Number of contacts by respondent characteristics, time period and contact setting for Wuhan.*

| Characteristics                    | COVID-19 Outbreak, mean (95% CI) <sup>a</sup> |                |              |              | Post-lockdown, weighed mean (95% CI) <sup>a</sup> |                |                |                |
|------------------------------------|-----------------------------------------------|----------------|--------------|--------------|---------------------------------------------------|----------------|----------------|----------------|
|                                    | N (%)                                         | Household      | Workplace    | Community    | N (%)                                             | Household      | Workplace      | Community      |
| Overall                            | 627 (100.0)                                   | 1.9 (1.8, 2)   | 0 (0, 0.1)   | 0.1 (0, 0.1) | 822 (100.0)                                       | 2.1 (2, 2.2)   | 0.9 (0.6, 1.1) | 0.3 (0.3, 0.4) |
| <b>Sex</b>                         |                                               |                |              |              |                                                   |                |                |                |
| Male                               | 301 (48)                                      | 1.7 (1.6, 1.9) | 0 (0, 0)     | 0.1 (0, 0.1) | 384 (46.7)                                        | 2.1 (2, 2.2)   | 0.7 (0.5, 0.9) | 0.3 (0.2, 0.4) |
| Female                             | 326 (52)                                      | 2 (1.9, 2.1)   | 0.1 (0, 0.2) | 0.1 (0, 0.1) | 438 (53.3)                                        | 2.1 (2, 2.2)   | 1.1 (0.6, 1.6) | 0.4 (0.3, 0.5) |
| <b>Age group</b>                   |                                               |                |              |              |                                                   |                |                |                |
| 0-6 y                              | 12 (1.9)                                      | 2.2 (1.7, 2.8) | 0 (0, 0)     | 0 (0, 0)     | 81 (9.9)                                          | 2.6 (2.4, 2.8) | 0 (0, 0)       | 0.1 (0, 0.2)   |
| 7-19 y                             | 79 (12.6)                                     | 2.1 (2, 2.2)   | 0 (0, 0)     | 0 (0, 0)     | 123 (15)                                          | 2.3 (2.2, 2.5) | 0 (0, 0)       | 0 (0, 0.1)     |
| 20-39 y                            | 256 (40.8)                                    | 1.9 (1.7, 2)   | 0.1 (0, 0.2) | 0.1 (0, 0.2) | 206 (25.1)                                        | 2.1 (1.9, 2.2) | 2.2 (1.4, 3.2) | 0.6 (0.4, 0.7) |
| 40-59 y                            | 220 (35.1)                                    | 1.9 (1.8, 2.1) | 0 (0, 0.1)   | 0 (0, 0)     | 204 (24.8)                                        | 1.9 (1.8, 2)   | 1.3 (0.8, 1.8) | 0.6 (0.4, 0.8) |
| ≥60 y                              | 60 (9.6)                                      | 1.3 (1.1, 1.6) | 0 (0, 0)     | 0.1 (0, 0.2) | 208 (25.3)                                        | 2 (1.9, 2.2)   | 0.1 (0, 0.2)   | 0.2 (0.1, 0.3) |
| <b>Type of profession</b>          |                                               |                |              |              |                                                   |                |                |                |
| Pre-school                         | 12 (1.9)                                      | 2.2 (1.7, 2.8) | 0 (0, 0)     | 0 (0, 0)     | 79 (9.6)                                          | 2.6 (2.4, 2.8) | 0 (0, 0)       | 0.1 (0, 0.2)   |
| Student                            | 107 (17.1)                                    | 2.1 (2, 2.3)   | 0 (0, 0)     | 0 (0, 0)     | 134 (16.3)                                        | 2.3 (2.2, 2.5) | 0 (0, 0)       | 0.1 (0, 0.2)   |
| Employed                           | 390 (62.2)                                    | 1.9 (1.8, 2)   | 0.1 (0, 0.2) | 0.1 (0, 0.1) | 327 (39.8)                                        | 2 (1.9, 2.1)   | 2.2 (1.6, 2.9) | 0.5 (0.4, 0.7) |
| Working-age not in the labor force | 31 (4.9)                                      | 1.7 (1.2, 2.3) | 0 (0, 0)     | 0.2 (0, 0.4) | 34 (4.1)                                          | 2.3 (2, 2.7)   | 0 (0, 0)       | 0.5 (0.2, 0.9) |
| Retired                            | 87 (13.9)                                     | 1.4 (1.2, 1.6) | 0 (0, 0)     | 0.1 (0, 0.2) | 248 (30.2)                                        | 2 (1.8, 2.1)   | 0 (0, 0)       | 0.4 (0.2, 0.5) |
| <b>Household size</b>              |                                               |                |              |              |                                                   |                |                |                |
| 1                                  | 45 (7.2)                                      | 0.1 (0, 0.1)   | 0.4 (0, 1.1) | 0.2 (0, 0.3) | 31 (3.8)                                          | 0.1 (0, 0.2)   | 1.7 (0.6, 3.4) | 0.6 (0.2, 1.1) |
| 2                                  | 76 (12.1)                                     | 1 (0.9, 1.1)   | 0.1 (0, 0.2) | 0.1 (0, 0.1) | 153 (18.6)                                        | 1 (1, 1)       | 0.5 (0.2, 0.8) | 0.4 (0.3, 0.6) |
| 3                                  | 283 (45.1)                                    | 1.8 (1.8, 1.9) | 0 (0, 0)     | 0.1 (0, 0.1) | 408 (49.6)                                        | 2 (1.9, 2)     | 1.1 (0.7, 1.7) | 0.4 (0.2, 0.5) |
| 4                                  | 132 (21.1)                                    | 2.3 (2.1, 2.4) | 0 (0, 0.1)   | 0 (0, 0.1)   | 148 (18)                                          | 2.9 (2.9, 3)   | 0.3 (0.1, 0.5) | 0.2 (0.1, 0.3) |
| ≥5                                 | 91 (14.5)                                     | 3.1 (2.8, 3.4) | 0 (0, 0)     | 0.1 (0, 0.2) | 82 (10)                                           | 4.1 (4, 4.2)   | 1.3 (0.4, 2.6) | 0.4 (0.2, 0.7) |

Note that reduced denominators indicate missing data. Percentages may not total 100 because of rounding.

<sup>a</sup>The 95% confidence interval on the mean are calculated by bootstrap sampling.



**Table S18.** *Number of contacts by respondent characteristics, time period and contact setting for Shanghai.*

| Characteristics                    | Baseline period, mean (95% CI) <sup>a</sup> |                |                   |                  |                 | COVID-19 Outbreak, mean (95% CI) <sup>a</sup> |                |              |                | Post-lockdown, weighed mean (95% CI) <sup>a</sup> |                |                |                |
|------------------------------------|---------------------------------------------|----------------|-------------------|------------------|-----------------|-----------------------------------------------|----------------|--------------|----------------|---------------------------------------------------|----------------|----------------|----------------|
|                                    | N (%)                                       | Household      | Workplace         | School           | Community       | N (%)                                         | Household      | Workplace    | Community      | N (%)                                             | Household      | Workplace      | Community      |
| Overall                            | 965 (100.0)                                 | 2.5 (2.4, 2.7) | 6.9 (5.9, 7.9)    | 2.4 (1.9, 3.1)   | 5.9 (5.1, 6.7)  | 557 (100.0)                                   | 1.8 (1.7, 1.9) | 0.3 (0, 0.6) | 0.2 (0.1, 0.4) | 814 (100.0)                                       | 2 (1.9, 2.1)   | 0.6 (0.4, 0.8) | 0.2 (0.1, 0.2) |
| <b>Sex</b>                         |                                             |                |                   |                  |                 |                                               |                |              |                |                                                   |                |                |                |
| Male                               | 474 (49.1)                                  | 2.5 (2.3, 2.8) | 8 (6.6, 9.6)      | 2.2 (1.4, 3.1)   | 5.3 (4.4, 6.3)  | 286 (51.3)                                    | 1.6 (1.5, 1.8) | 0.1 (0, 0.2) | 0.3 (0.1, 0.5) | 400 (49.1)                                        | 2 (1.9, 2.1)   | 0.5 (0.3, 0.7) | 0.1 (0.1, 0.2) |
| Female                             | 491 (50.9)                                  | 2.5 (2.3, 2.8) | 5.8 (4.6, 6.9)    | 2.7 (1.9, 3.6)   | 6.5 (5.4, 7.8)  | 271 (48.7)                                    | 2 (1.8, 2.1)   | 0.4 (0, 1.2) | 0.2 (0.1, 0.3) | 414 (50.9)                                        | 2 (1.9, 2.1)   | 0.7 (0.4, 1.2) | 0.2 (0.1, 0.3) |
| <b>Age group</b>                   |                                             |                |                   |                  |                 |                                               |                |              |                |                                                   |                |                |                |
| 0-6 y                              | 88 (9.1)                                    | 3.7 (3.4, 4.1) | 0 (0, 0)          | 3.8 (1.9, 6.2)   | 3.2 (1.7, 5.1)  | 14 (2.5)                                      | 1.9 (1.7, 2.2) | 0 (0, 0)     | 0 (0, 0)       | 63 (7.7)                                          | 2.5 (2.3, 2.7) | 0 (0, 0)       | 0 (0, 0)       |
| 7-19 y                             | 141 (14.6)                                  | 2.8 (2.5, 3.1) | 2.9 (1, 5)        | 14.3 (11.7, 17)  | 6.3 (4.2, 8.5)  | 55 (9.9)                                      | 2.1 (1.9, 2.4) | 0 (0, 0)     | 0.4 (0, 1.1)   | 136 (16.7)                                        | 2.2 (2.1, 2.4) | 0 (0, 0.1)     | 0 (0, 0.1)     |
| 20-39 y                            | 236 (24.5)                                  | 2.2 (2, 2.4)   | 15 (12.4, 17.7)   | 0 (0, 0)         | 4.1 (2.8, 5.6)  | 254 (45.6)                                    | 1.8 (1.6, 2)   | 0.1 (0, 0.2) | 0.2 (0.1, 0.4) | 203 (24.9)                                        | 1.9 (1.7, 2)   | 1.5 (0.8, 2.3) | 0.2 (0.1, 0.3) |
| 40-59 y                            | 233 (24.1)                                  | 2.5 (2.1, 2.9) | 10.2 (8, 12.2)    | 0 (0, 0)         | 6 (4.6, 7.6)    | 160 (28.7)                                    | 1.8 (1.6, 2)   | 0.7 (0, 2)   | 0.2 (0.1, 0.4) | 209 (25.7)                                        | 1.9 (1.8, 2.1) | 0.9 (0.4, 1.5) | 0.3 (0.2, 0.5) |
| ≥60 y                              | 267 (27.7)                                  | 2.3 (2, 2.7)   | 1.1 (0.4, 2)      | 0 (0, 0)         | 8.1 (6.7, 9.5)  | 74 (13.3)                                     | 1.4 (1.1, 1.7) | 0 (0, 0)     | 0.1 (0, 0.3)   | 203 (24.9)                                        | 1.8 (1.7, 2)   | 0 (0, 0.1)     | 0.1 (0, 0.2)   |
| <b>Type of profession</b>          |                                             |                |                   |                  |                 |                                               |                |              |                |                                                   |                |                |                |
| Pre-school                         | 79 (8.2)                                    | 3.7 (3.4, 4.2) | 0 (0, 0)          | 2.8 (1, 4.8)     | 3.1 (1.5, 5)    | 14 (2.5)                                      | 1.9 (1.7, 2.1) | 0 (0, 0)     | 0 (0, 0)       | 46 (5.7)                                          | 2.6 (2.3, 2.8) | 0 (0, 0)       | 0 (0, 0.1)     |
| Student                            | 173 (17.9)                                  | 2.7 (2.5, 3)   | 4.3 (2.4, 6.5)    | 12.4 (9.7, 14.8) | 6.1 (4.2, 8.2)  | 71 (12.7)                                     | 2 (1.8, 2.3)   | 0 (0, 0)     | 0.3 (0, 0.9)   | 164 (20.1)                                        | 2.2 (2.1, 2.4) | 0 (0, 0)       | 0 (0, 0)       |
| Employed                           | 400 (41.5)                                  | 2.2 (2.1, 2.4) | 14.6 (12.5, 16.7) | 0 (0, 0)         | 4.7 (3.7, 5.8)  | 354 (63.6)                                    | 1.8 (1.7, 2)   | 0.4 (0.1, 1) | 0.2 (0.1, 0.4) | 336 (41.3)                                        | 1.9 (1.8, 2)   | 1.5 (1, 2.1)   | 0.2 (0.1, 0.4) |
| Working-age not in the labor force | 29 (3)                                      | 2.8 (2, 3.8)   | 0 (0, 0)          | 0 (0, 0)         | 8.2 (3.3, 16.2) | 24 (4.3)                                      | 1.8 (1.2, 2.2) | 0 (0, 0)     | 0 (0, 0)       | 36 (4.4)                                          | 2.4 (2, 2.9)   | 0 (0, 0)       | 0.1 (0, 0.3)   |
| Retired                            | 278 (28.8)                                  | 2.5 (2.1, 2.9) | 0 (0, 0)          | 0 (0, 0)         | 8.3 (7, 9.8)    | 94 (16.9)                                     | 1.4 (1.2, 1.6) | 0 (0, 0)     | 0.2 (0.1, 0.3) | 232 (28.5)                                        | 1.8 (1.7, 1.9) | 0 (0, 0)       | 0.2 (0.1, 0.2) |
| <b>Household size</b>              |                                             |                |                   |                  |                 |                                               |                |              |                |                                                   |                |                |                |
| 1                                  | 35 (3.6)                                    | 1 (0.4, 1.6)   | 6 (1.9, 11.3)     | 0 (0, 0)         | 7.6 (4.8, 11.3) | 61 (11)                                       | 0.1 (0, 0.3)   | 0 (0, 0)     | 0.1 (0.1, 0.2) | 57 (7)                                            | 0.1 (0, 0.2)   | 0.3 (0.1, 0.6) | 0.2 (0, 0.4)   |
| 2                                  | 244 (25.3)                                  | 1.7 (1.5, 1.9) | 5.1 (3.6, 6.8)    | 0 (0, 0)         | 6.4 (5.1, 7.9)  | 138 (24.8)                                    | 1 (0.9, 1.1)   | 0 (0, 0.1)   | 0.3 (0.1, 0.7) | 156 (19.2)                                        | 1.1 (1, 1.2)   | 0.2 (0.1, 0.4) | 0.1 (0, 0.2)   |
| 3                                  | 432 (44.8)                                  | 2.4 (2.2, 2.7) | 7.5 (6.2, 9)      | 3.5 (2.5, 4.5)   | 5.8 (4.7, 7.1)  | 216 (38.8)                                    | 1.9 (1.8, 1.9) | 0.1 (0, 0.3) | 0.1 (0, 0.2)   | 406 (49.9)                                        | 2 (1.9, 2)     | 0.6 (0.3, 1)   | 0.2 (0.1, 0.3) |
| 4                                  | 117 (12.1)                                  | 3.1 (2.6, 3.6) | 8.1 (5.2, 11.5)   | 2.8 (1.2, 4.8)   | 5.1 (3.2, 7.4)  | 78 (14)                                       | 2.6 (2.4, 2.8) | 0.1 (0, 0.3) | 0.2 (0.1, 0.3) | 122 (15)                                          | 2.9 (2.8, 3)   | 1 (0.4, 1.7)   | 0.2 (0.1, 0.5) |
| ≥5                                 | 137 (14.2)                                  | 4.4 (4, 4.8)   | 7.1 (4.2, 10.8)   | 3.9 (2.2, 5.7)   | 5.5 (3.7, 7.1)  | 64 (11.5)                                     | 3.8 (3.4, 4.1) | 1.5 (0, 4.6) | 0.5 (0, 1.2)   | 73 (9)                                            | 3.9 (3.7, 4.2) | 1.1 (0.2, 2.7) | 0 (0, 0)       |

Note that reduced denominators indicate missing data. Percentages may not total 100 because of rounding.

<sup>a</sup>The 95% confidence interval on the mean are calculated by bootstrap sampling.

**Table S19.** Number of contacts by respondent characteristics, time period and contact setting for Shenzhen.

| Characteristics                    | Baseline period, mean (95% CI) <sup>a</sup> |                |                |                |                | COVID-19 Outbreak, mean (95% CI) <sup>a</sup> |                |              |                | Post-lockdown, weighed mean (95% CI) <sup>a</sup> |                |                |                |
|------------------------------------|---------------------------------------------|----------------|----------------|----------------|----------------|-----------------------------------------------|----------------|--------------|----------------|---------------------------------------------------|----------------|----------------|----------------|
|                                    | N (%)                                       | Household      | Workplace      | School         | Community      | N (%)                                         | Household      | Workplace    | Community      | N (%)                                             | Household      | Workplace      | Community      |
| Overall                            | 741 (100.0)                                 | 2 (1.9, 2.1)   | 2.6 (2.1, 3.1) | 1.6 (1.2, 2.1) | 1.6 (1.4, 1.9) | 836 (100.0)                                   | 1.9 (1.9, 2)   | 0.1 (0, 0.2) | 0.1 (0.1, 0.2) | 837 (100.0)                                       | 1.8 (1.7, 1.9) | 0.6 (0.4, 0.8) | 0.2 (0.1, 0.2) |
| <b>Sex</b>                         |                                             |                |                |                |                |                                               |                |              |                |                                                   |                |                |                |
| Male                               | 371 (50.1)                                  | 2.1 (2, 2.3)   | 2.7 (2.1, 3.4) | 2 (1.4, 2.7)   | 1.8 (1.4, 2.2) | 419 (50.1)                                    | 1.9 (1.8, 2)   | 0.1 (0, 0.3) | 0.1 (0.1, 0.2) | 420 (50.2)                                        | 1.8 (1.7, 1.9) | 0.6 (0.4, 0.8) | 0.1 (0.1, 0.2) |
| Female                             | 370 (49.9)                                  | 2 (1.8, 2.1)   | 2.5 (1.9, 3.4) | 1.2 (0.8, 1.8) | 1.5 (1.2, 1.8) | 417 (49.9)                                    | 1.9 (1.8, 2.1) | 0 (0, 0)     | 0.1 (0.1, 0.2) | 417 (49.8)                                        | 1.8 (1.6, 1.9) | 0.6 (0.4, 0.9) | 0.2 (0.1, 0.3) |
| <b>Age group</b>                   |                                             |                |                |                |                |                                               |                |              |                |                                                   |                |                |                |
| 0-6 y                              | 51 (6.9)                                    | 2.4 (2.1, 2.6) | 0 (0, 0)       | 3.7 (1.8, 6.2) | 1.1 (0.5, 1.8) | 53 (6.3)                                      | 2.5 (2.2, 2.8) | 0 (0, 0)     | 0 (0, 0.1)     | 53 (6.3)                                          | 2.4 (2.1, 2.6) | 0 (0, 0)       | 0.1 (0, 0.3)   |
| 7-19 y                             | 128 (17.3)                                  | 2.1 (1.9, 2.3) | 0.4 (0.1, 0.9) | 7.8 (6.1, 9.8) | 1.2 (0.7, 1.8) | 161 (19.3)                                    | 2.2 (2.1, 2.4) | 0.2 (0, 0.5) | 0.1 (0, 0.2)   | 160 (19.1)                                        | 2.1 (2, 2.3)   | 0.1 (0, 0.4)   | 0.1 (0, 0.1)   |
| 20-39 y                            | 190 (25.6)                                  | 1.7 (1.5, 1.9) | 4.8 (4, 5.7)   | 0.1 (0, 0.3)   | 1.3 (1, 1.8)   | 215 (25.7)                                    | 1.6 (1.4, 1.8) | 0 (0, 0.1)   | 0.2 (0.1, 0.3) | 216 (25.8)                                        | 1.3 (1.1, 1.4) | 1.5 (1, 2.1)   | 0.2 (0.1, 0.3) |
| 40-59 y                            | 176 (23.8)                                  | 1.8 (1.6, 2)   | 5.1 (3.7, 6.7) | 0 (0, 0)       | 1.6 (1.2, 2)   | 204 (24.4)                                    | 1.8 (1.6, 1.9) | 0.1 (0, 0.4) | 0.1 (0.1, 0.2) | 205 (24.5)                                        | 1.6 (1.5, 1.8) | 0.7 (0.4, 1.1) | 0.2 (0.1, 0.4) |
| ≥60 y                              | 196 (26.5)                                  | 2.4 (2.1, 2.6) | 0.2 (0.1, 0.4) | 0 (0, 0)       | 2.4 (1.9, 3)   | 203 (24.3)                                    | 2.1 (1.9, 2.3) | 0 (0, 0.1)   | 0.1 (0.1, 0.2) | 203 (24.3)                                        | 2.1 (1.9, 2.2) | 0 (0, 0.1)     | 0.1 (0, 0.3)   |
| <b>Type of profession</b>          |                                             |                |                |                |                |                                               |                |              |                |                                                   |                |                |                |
| Pre-school                         | 38 (5.1)                                    | 2.3 (2, 2.6)   | 0 (0, 0)       | 2.1 (0.3, 4.5) | 0.8 (0.3, 1.3) | 38 (4.5)                                      | 2.5 (2.2, 2.8) | 0 (0, 0)     | 0.1 (0, 0.2)   | 38 (4.5)                                          | 2.3 (2.1, 2.6) | 0 (0, 0)       | 0.2 (0, 0.5)   |
| Student                            | 141 (19)                                    | 2.2 (2, 2.4)   | 0.3 (0.1, 0.7) | 8 (6.4, 9.8)   | 1.3 (0.8, 1.8) | 174 (20.8)                                    | 2.3 (2.2, 2.5) | 0.1 (0, 0.5) | 0.1 (0, 0.1)   | 172 (20.5)                                        | 2.3 (2.1, 2.4) | 0.1 (0, 0.3)   | 0.1 (0, 0.1)   |
| Employed                           | 275 (37.1)                                  | 1.8 (1.7, 2)   | 6.1 (5.3, 7)   | 0 (0, 0)       | 1.3 (1, 1.7)   | 334 (40)                                      | 1.7 (1.5, 1.8) | 0.1 (0, 0.3) | 0.2 (0.1, 0.3) | 337 (40.3)                                        | 1.4 (1.3, 1.6) | 1.4 (1.1, 1.8) | 0.2 (0.1, 0.2) |
| Working-age not in the labor force | 64 (8.6)                                    | 1.8 (1.5, 2.1) | 2.5 (0.5, 6.9) | 0 (0, 0)       | 1.6 (0.9, 2.4) | 66 (7.9)                                      | 1.7 (1.4, 1.9) | 0 (0, 0)     | 0.1 (0, 0.2)   | 66 (7.9)                                          | 1.5 (1.2, 1.7) | 0 (0, 0)       | 0.3 (0.1, 0.5) |
| Retired                            | 223 (30.1)                                  | 2.2 (2, 2.5)   | 0.1 (0, 0.2)   | 0 (0, 0)       | 2.4 (1.9, 3)   | 224 (26.8)                                    | 2 (1.9, 2.2)   | 0 (0, 0)     | 0.1 (0.1, 0.2) | 224 (26.8)                                        | 2 (1.8, 2.1)   | 0 (0, 0)       | 0.2 (0.1, 0.3) |
| <b>Household size</b>              |                                             |                |                |                |                |                                               |                |              |                |                                                   |                |                |                |
| 1                                  | 102 (13.8)                                  | 0.7 (0.5, 1.1) | 3.1 (2.3, 4.2) | 0.3 (0, 0.9)   | 1.3 (0.8, 2)   | 118 (14.1)                                    | 0.5 (0.3, 0.7) | 0.1 (0, 0.1) | 0.3 (0.1, 0.4) | 118 (14.1)                                        | 0.1 (0, 0.2)   | 0.7 (0.4, 1)   | 0.2 (0.1, 0.4) |
| 2                                  | 165 (22.3)                                  | 1.3 (1.1, 1.5) | 2.9 (1.6, 4.7) | 0.5 (0.1, 1.2) | 1.6 (1.2, 2.2) | 186 (22.2)                                    | 1.1 (1, 1.2)   | 0 (0, 0)     | 0.1 (0, 0.2)   | 187 (22.3)                                        | 1 (0.9, 1)     | 0.7 (0.3, 1.2) | 0.2 (0.1, 0.4) |
| 3                                  | 307 (41.4)                                  | 2.1 (2, 2.1)   | 2.6 (2, 3.2)   | 2.7 (2, 3.6)   | 1.4 (1.1, 1.7) | 347 (41.5)                                    | 2 (2, 2.1)     | 0.1 (0, 0.3) | 0.1 (0.1, 0.2) | 345 (41.2)                                        | 2 (1.9, 2)     | 0.7 (0.5, 1)   | 0.1 (0.1, 0.2) |
| 4                                  | 90 (12.1)                                   | 3.2 (2.9, 3.6) | 2 (1.2, 3)     | 1.2 (0.4, 2.4) | 1.9 (1.3, 2.5) | 99 (11.8)                                     | 3 (2.8, 3.1)   | 0 (0, 0.1)   | 0.1 (0, 0.2)   | 101 (12.1)                                        | 2.8 (2.6, 2.9) | 0.2 (0.1, 0.3) | 0.2 (0, 0.3)   |
| ≥5                                 | 77 (10.4)                                   | 3.8 (3.5, 4.1) | 1.8 (0.8, 3)   | 1.8 (0.8, 3.4) | 2.7 (1.6, 4.1) | 86 (10.3)                                     | 4.1 (4, 4.3)   | 0.1 (0, 0.2) | 0.1 (0, 0.2)   | 86 (10.3)                                         | 4 (3.8, 4.2)   | 0.2 (0, 0.5)   | 0.1 (0, 0.2)   |

Note that reduced denominators indicate missing data. Percentages may not total 100 because of rounding.

<sup>a</sup>The 95% confidence interval on the mean are calculated by bootstrap sampling.

**Table S20.** Number of contacts by respondent characteristics, time period and contact setting for Changsha.

| Characteristics                    | Baseline period, mean (95% CI) <sup>a</sup> |              |              |              |              | COVID-19 Outbreak, mean (95% CI) <sup>a</sup> |              |              |              | Post-lockdown, weighed mean (95% CI) <sup>a</sup> |              |              |              |
|------------------------------------|---------------------------------------------|--------------|--------------|--------------|--------------|-----------------------------------------------|--------------|--------------|--------------|---------------------------------------------------|--------------|--------------|--------------|
|                                    | N (%)                                       | Household    | Workplace    | School       | Community    | N (%)                                         | Household    | Workplace    | Community    | N (%)                                             | Household    | Workplace    | Community    |
| Overall                            | 738                                         | 2.2 (2.1,    | 2.7 (2.2,    | 2.7 (2.1,    | 1.8 (1.5,    | 813                                           | 2 (1.9, 2.1) | 0 (0, 0.1)   | 0.1 (0.1,    | 832                                               | 1.8 (1.7,    | 0.4 (0.2,    | 0.1 (0.1,    |
| <b>Sex</b>                         |                                             |              |              |              |              |                                               |              |              |              |                                                   |              |              |              |
| Male                               | 361                                         | 2.4 (2.2,    | 1.9 (1.4,    | 3.7 (2.6,    | 1.8 (1.3,    | 398 (49)                                      | 2.1 (1.9,    | 0.1 (0, 0.1) | 0.1 (0.1,    | 405                                               | 1.9 (1.8, 2) | 0.6 (0.2,    | 0.1 (0.1,    |
| Female                             | 377                                         | 2.1 (1.9,    | 3.5 (2.5,    | 1.8 (1.1,    | 1.9 (1.6,    | 415 (51)                                      | 1.9 (1.8, 2) | 0 (0, 0.1)   | 0.1 (0.1,    | 427                                               | 1.8 (1.7,    | 0.2 (0.1,    | 0.1 (0.1,    |
| <b>Age group</b>                   |                                             |              |              |              |              |                                               |              |              |              |                                                   |              |              |              |
| 0-6 y                              | 60                                          | 3.2 (2.6,    | 0 (0, 0)     | 6.9 (3.9,    | 0.8 (0.4,    | 60 (7.4)                                      | 2.6 (2.3,    | 0 (0, 0)     | 0.1 (0, 0.3) | 60 (7.2)                                          | 2.5 (2.2,    | 0 (0, 0)     | 0.1 (0, 0.4) |
| 7-19 y                             | 119                                         | 2 (1.7, 2.2) | 0.9 (0.2,    | 12.7 (9.8,   | 0.8 (0.4,    | 149                                           | 2.1 (2, 2.3) | 0 (0, 0)     | 0.1 (0, 0.2) | 150 (18)                                          | 2 (1.8, 2.1) | 0 (0, 0.1)   | 0.1 (0, 0.2) |
| 20-39 y                            | 188                                         | 2.2 (1.9,    | 4.8 (3.4,    | 0.5 (0.1,    | 1.6 (1, 2.3) | 198                                           | 2 (1.7, 2.4) | 0.1 (0, 0.1) | 0.1 (0.1,    | 209                                               | 1.7 (1.5,    | 1 (0.4, 2.2) | 0.1 (0, 0.2) |
| 40-59 y                            | 174                                         | 2 (1.8, 2.3) | 5.5 (4, 7.3) | 0 (0, 0)     | 1.9 (1.4,    | 205                                           | 1.9 (1.7, 2) | 0.1 (0, 0.2) | 0.1 (0, 0.2) | 211                                               | 1.8 (1.7, 2) | 0.4 (0.2,    | 0.1 (0.1,    |
| ≥60 y                              | 197                                         | 2.3 (2, 2.6) | 0.3 (0.1,    | 0 (0, 0)     | 2.9 (2.3,    | 201                                           | 1.8 (1.7, 2) | 0 (0, 0)     | 0.1 (0.1,    | 202                                               | 1.7 (1.5,    | 0 (0, 0.1)   | 0.1 (0.1,    |
| <b>Type of profession</b>          |                                             |              |              |              |              |                                               |              |              |              |                                                   |              |              |              |
| Pre-school                         | 43                                          | 3.2 (2.4,    | 0 (0, 0)     | 4.7 (1.6,    | 0.5 (0.1,    | 43 (5.3)                                      | 2.7 (2.3,    | 0 (0, 0)     | 0 (0, 0.1)   | 43 (5.2)                                          | 2.6 (2.3,    | 0 (0, 0)     | 0.1 (0, 0.2) |
| Student                            | 142                                         | 2.3 (2, 2.5) | 0.2 (0, 0.5) | 12.8 (10.3,  | 1.3 (0.6,    | 170                                           | 2.2 (2.1,    | 0 (0, 0)     | 0.1 (0, 0.2) | 171                                               | 2.1 (2, 2.3) | 0 (0, 0)     | 0.1 (0, 0.2) |
| Employed                           | 280                                         | 2 (1.8, 2.2) | 6.9 (5.5,    | 0 (0, 0)     | 1.4 (1, 1.8) | 329                                           | 1.9 (1.7,    | 0.1 (0, 0.2) | 0.2 (0.1,    | 346                                               | 1.7 (1.6,    | 0.9 (0.4,    | 0.2 (0.1,    |
| Working-age not in the labor force | 62                                          | 2.4 (1.9, 3) | 0.7 (0.2,    | 0 (0, 0)     | 2.4 (1.4,    | 63 (7.7)                                      | 2 (1.7, 2.3) | 0 (0, 0)     | 0.1 (0, 0.2) | 64 (7.7)                                          | 1.8 (1.5,    | 0 (0, 0)     | 0.1 (0, 0.2) |
| Retired                            | 211                                         | 2.2 (2, 2.6) | 0.1 (0, 0.1) | 0 (0, 0)     | 3 (2.4, 3.6) | 208                                           | 1.8 (1.6,    | 0 (0, 0)     | 0.1 (0.1,    | 208 (25)                                          | 1.6 (1.5,    | 0 (0, 0)     | 0.1 (0.1,    |
| <b>Household size</b>              |                                             |              |              |              |              |                                               |              |              |              |                                                   |              |              |              |
| 1                                  | 68                                          | 1.1 (0.6,    | 2.9 (1.6,    | 0.4 (0, 1.1) | 1 (0.6, 1.6) | 78 (9.6)                                      | 0.8 (0.3,    | 0 (0, 0.1)   | 0.1 (0, 0.3) | 80 (9.6)                                          | 0.1 (0, 0.1) | 0.6 (0.2, 1) | 0.1 (0, 0.2) |
| 2                                  | 184                                         | 1.4 (1.2,    | 2.2 (1.3,    | 0.5 (0.1,    | 2.5 (1.9,    | 191                                           | 1.2 (1.1,    | 0.1 (0, 0.2) | 0.1 (0, 0.2) | 194                                               | 1 (1, 1.1)   | 0.2 (0.1,    | 0.2 (0.1,    |
| 3                                  | 308                                         | 2.2 (2, 2.4) | 3.2 (2.2,    | 4.8 (3.6,    | 1.2 (0.9,    | 342                                           | 2 (2, 2.1)   | 0 (0, 0.1)   | 0.1 (0.1,    | 347                                               | 1.9 (1.9, 2) | 0.2 (0.1,    | 0.1 (0.1,    |
| 4                                  | 110                                         | 3.3 (2.9,    | 2.6 (1.1,    | 2.5 (1.1,    | 2.5 (1.7,    | 124                                           | 2.8 (2.7,    | 0 (0, 0)     | 0.1 (0, 0.2) | 128                                               | 2.6 (2.5,    | 0.9 (0, 2.5) | 0.1 (0, 0.2) |
| ≥5                                 | 68                                          | 4 (3.6, 4.4) | 2.3 (1.3,    | 2.2 (0.4,    | 2.8 (1.4,    | 78 (9.6)                                      | 3.7 (3.4,    | 0 (0, 0)     | 0.2 (0.1,    | 83 (10)                                           | 3.7 (3.4,    | 0.4 (0.1,    | 0.1 (0, 0.2) |

Note that reduced denominators indicate missing data. Percentages may not total 100 because of rounding.

<sup>a</sup>The 95% confidence interval on the mean are calculated by bootstrap sampling.

**Table S21.** Employed respondents who had no contacts at workplace on weekdays during post-lockdown period.

| Reason of having no contacts at workplace                                         | Wuhan<br>(n=147)   | Shanghai<br>(n=232) | Changsha<br>(n=183) | Shenzhen<br>(n=188) |
|-----------------------------------------------------------------------------------|--------------------|---------------------|---------------------|---------------------|
| Work from home or have not resumed work                                           | 78.2%<br>(115/147) | 82.8%<br>(192/232)  | 84.2%<br>(154/183)  | 78.7%<br>(148/188)  |
| Other reasons (e.g., goes to work but has no contacts, home quarantine, vacation) | 21.1%<br>(31/147)  | 3%<br>(7/232)       | 3.3%<br>(6/183)     | 3.7%<br>(7/188)     |
| Unknown                                                                           | 0.7%<br>(1/147)    | 14.2%<br>(33/232)   | 12.6%<br>(23/183)   | 17.5%<br>(33/188)   |

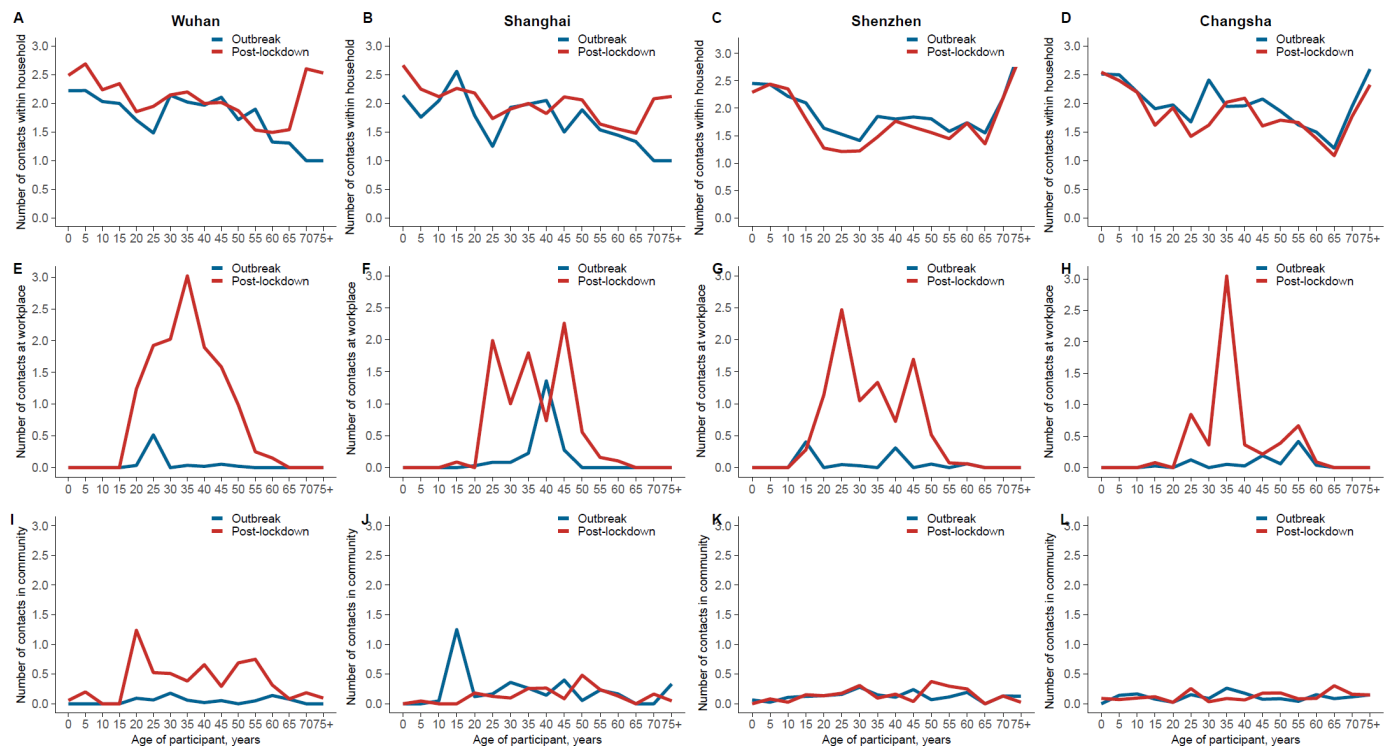

**Figure S8.** Number of reported contacts by setting, study location, participant age group, and time period. *A-D* correspond to contacts within household. *E-H* correspond to contacts at workplace. *I-L* correspond to contacts at community. *A/E/I* correspond to Wuhan. *B/F/J* correspond to Shanghai. *C/G/K* correspond to Shenzhen. *D/H/L* correspond to Changsha.

### 3.5 Analysis of contact setting during the outbreak and post-lockdown periods

We analyzed the recorded contacts by social setting where the interaction took place (e.g., home, workplace, school, community) during the outbreak and the post-lockdown periods. We found that, in the four cities, the vast majority of contacts during both periods still occurred at home, but workplace contacts increased during the post-lockdown period (Fig. S9).

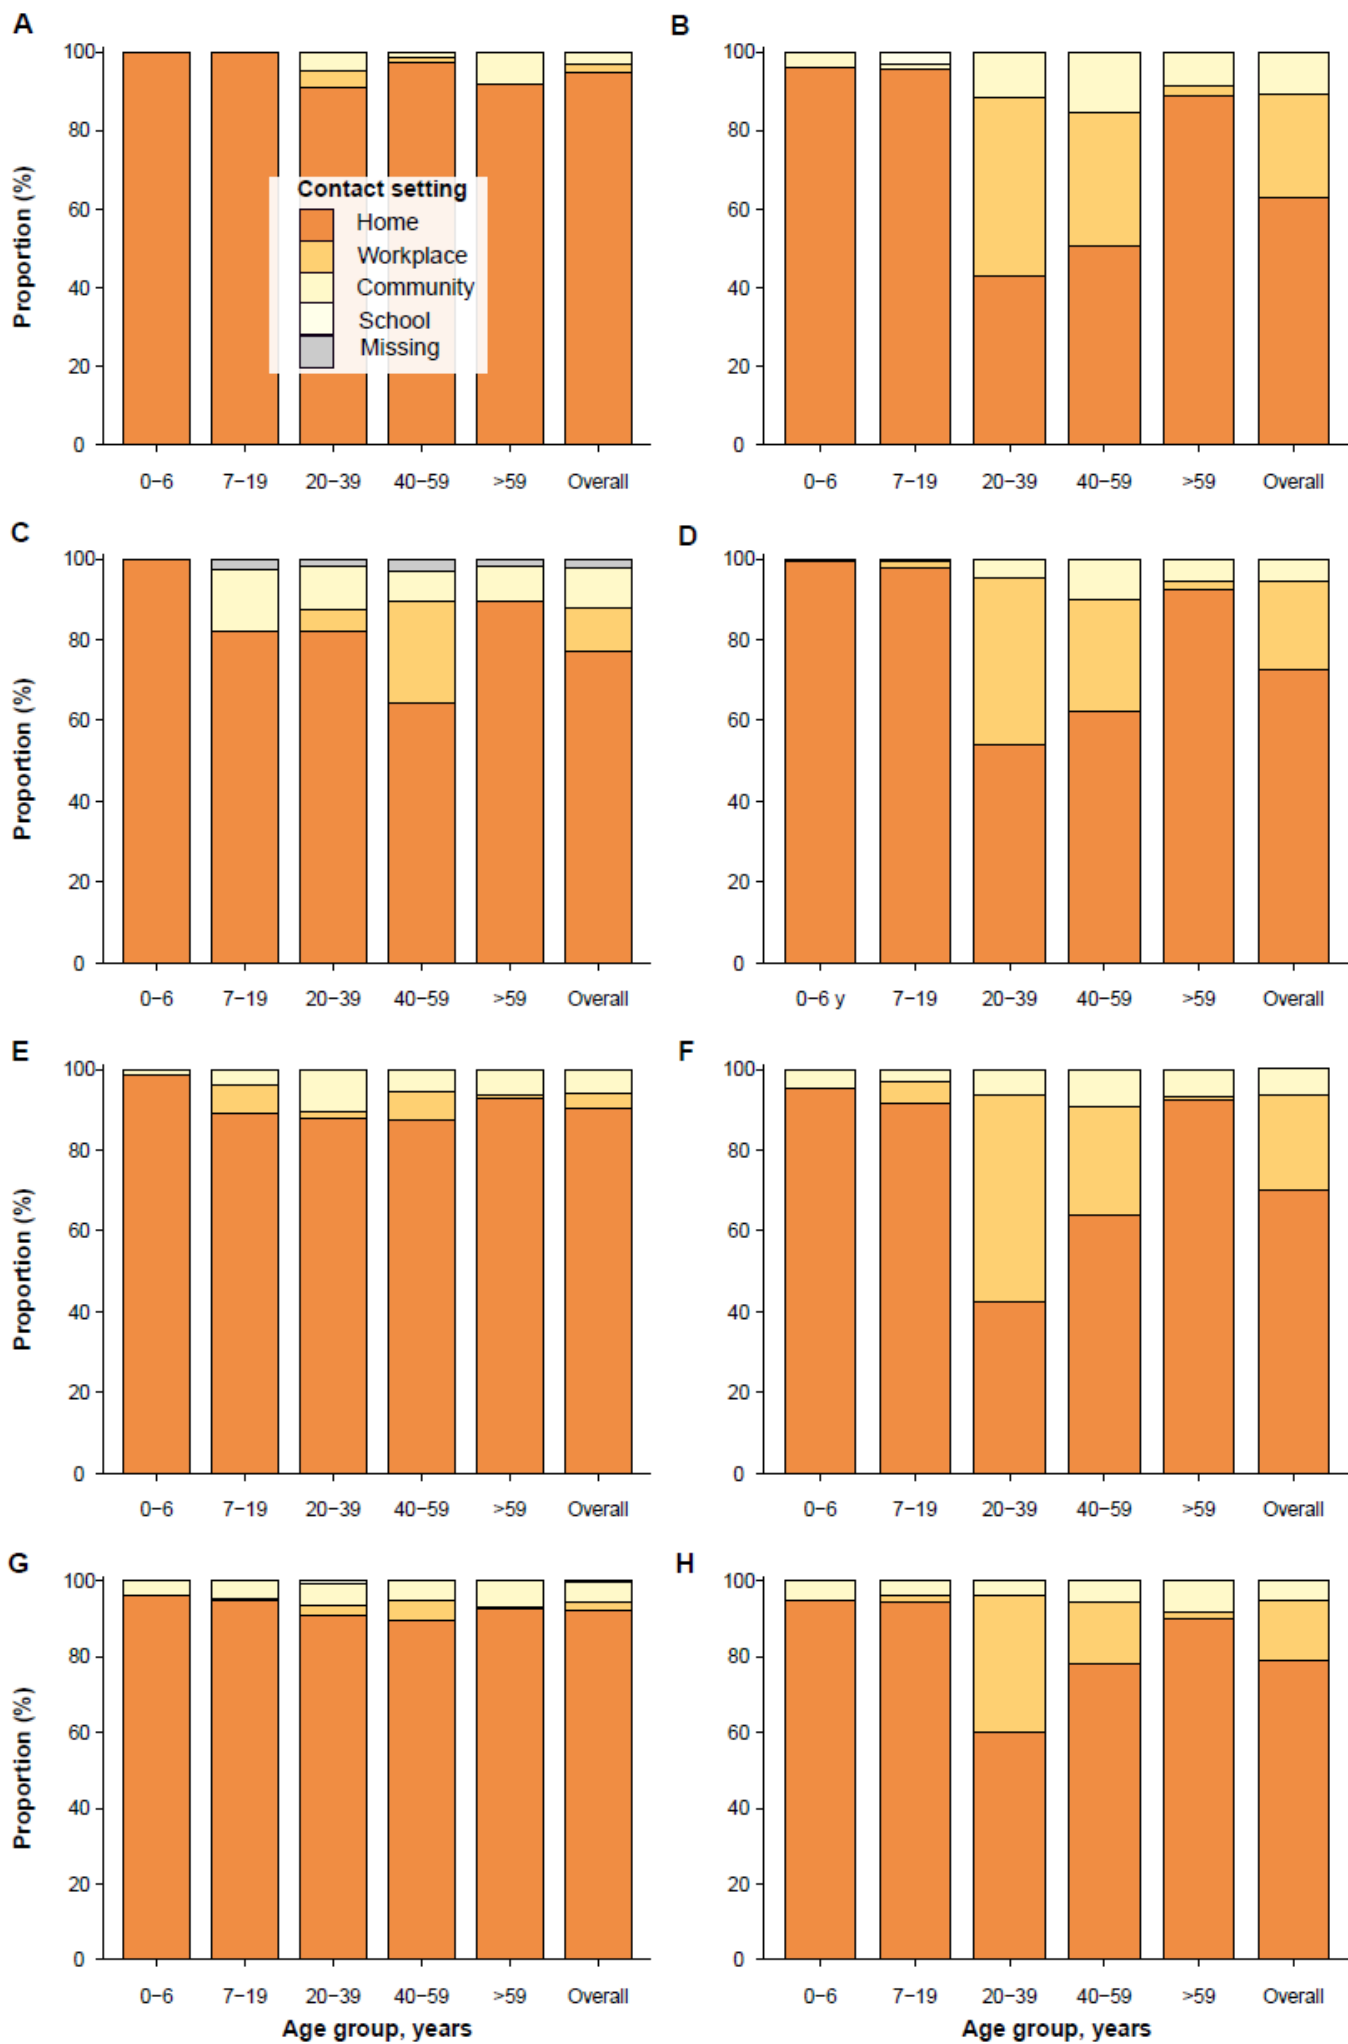

**Figure S9.** *A* Frequency of settings where contacts took place during the COVID-19 outbreak in Wuhan. *B* Same as *A*, but during post-lockdown period. *C-D* Same as *A-B*, but for Shanghai. *E-F* Same as *A-B*, but for Shenzhen. *G-H* Same as *A-B*, but for Changsha. Note that only senior high schools were reopened in Wuhan during the post-lockdown period, while schools were still closed for other three cities during the post-lockdown period.

### 3.6 Change of contacts over time

#### Statistical analysis

We analyzed the contacts for Wuhan and Shanghai during the outbreak period (February 1 to February 10, 2020), the contacts for Shanghai, Shenzhen, and Changsha during the post-lockdown period (March 1 to March 20, 2020), and the contacts for Wuhan during the post-lockdown period (May 7 to May 15, 2020). A total of 4,489 contact diaries were included to explore the change of contacts from the period with strict containment measures to the post-lockdown period (February to May, 2020). We also collected the contact diaries for Shenzhen and Changsha referring to the outbreak period, but we excluded them in this analysis as they may be prone to recall bias because of retrospective interviews.

Generalized additive regression model (GAM) was designed to evaluate the number of contacts by the date of contact diary during the two periods (outbreak and post-lockdown), and included the following categorical variables as explanatory factors: sex, age group, household size categories (with 5+ being the biggest household size), day of the week of the reported contacts (from Monday to Sunday), and survey city (Wuhan, Shanghai, Shenzhen, and Changsha). We assumed that the number of contacts followed a negative binomial distribution. Penalized spline was used to explore potential nonlinear relationships between the date of contact diary and number of contacts. Individuals were weighted to be representative of the actual population of each city in terms of age structure and household size. The specification of the GAM is the following:

$$g(\mu) = \alpha + s(D) + \beta_1 A + \beta_2 S + \beta_3 H + \beta_4 W + \beta_5 C + \varepsilon$$

where  $g$  is a log link function,  $\alpha$  is the intercept,  $s(D)$  denotes the nonlinear relationship between response variable and the date of contact diary, 3 knots were used in the penalized spline,  $A/S/H/W/C$  stand for participant age group, sex, household size, day of the week, and survey city, respectively.  $\varepsilon$  represents the random residential.

#### Results

In the Tab. S22 and Fig. S10, we reported the results of the regression analysis. Our results highlight a linear increasing trend of the number of contacts over time. Thus, we re-estimated the model with the first order spline. The resulting coefficient was 0.0064 and statistically significant ( $p$  value < 0.0001), indicating that 2 months after the first gradual work resumption, the daily number of contacts is predicted to be 0.38 more than at the day of such resumption. Participant age, sex, household size, day type, and survey city all had significant contribution to the number of contacts. Of them, those of 25-39 years, male, larger households, interviewed during the weekdays, and in Shenzhen have a higher probability of reporting more contacts.

**Table S22. Results of regression models.**

| <b>Characteristics</b> | <b>No. of contact diaries</b> | <b>OR (95% CI)</b> | <b>p value</b> |
|------------------------|-------------------------------|--------------------|----------------|
| <b>Intercept</b>       | -                             | 0.98 (0.84, 1.13)  | 0.7358         |
| <b>Age</b>             |                               |                    |                |
| 0-4 y                  | 169                           | 0.8 (0.7, 0.92)    | 0.0012         |
| 5-9 y                  | 318                           | 0.76 (0.67, 0.87)  | <0.0001        |
| 10-14 y                | 228                           | 0.74 (0.64, 0.86)  | <0.0001        |
| 15-19 y                | 271                           | 0.73 (0.64, 0.85)  | <0.0001        |
| 20-24 y                | 279                           | 0.89 (0.79, 1.01)  | 0.0724         |
| 25-29 y                | 345                           | 1.35 (1.21, 1.5)   | <0.0001        |
| 30-34 y                | 352                           | 1.13 (1.01, 1.26)  | 0.0361         |
| 35-39 y                | 368                           | 1.27 (1.13, 1.42)  | <0.0001        |
| 40-44 y                | 446                           | Reference          | -              |
| 45-49 y                | 243                           | 0.96 (0.86, 1.08)  | 0.5168         |
| 50-54 y                | 370                           | 0.96 (0.85, 1.08)  | 0.5038         |
| 55-59 y                | 150                           | 0.93 (0.81, 1.06)  | 0.2590         |
| 60-64 y                | 413                           | 0.72 (0.63, 0.83)  | <0.0001        |
| 65-69 y                | 120                           | 0.69 (0.59, 0.81)  | <0.0001        |
| 70-74 y                | 230                           | 0.65 (0.54, 0.79)  | <0.0001        |
| 75+ y                  | 187                           | 0.63 (0.53, 0.74)  | <0.0001        |
| <b>Sex</b>             |                               |                    |                |
| Male                   | 2196                          | Reference          | -              |
| Female                 | 2293                          | 0.92 (0.88, 0.97)  | 0.0010         |
| <b>Household size</b>  |                               |                    |                |
| 1                      | 392                           | Reference          | -              |
| 2                      | 904                           | 1.92 (1.73, 2.14)  | <0.0001        |
| 3                      | 2005                          | 3.17 (2.86, 3.52)  | <0.0001        |
| 4                      | 709                           | 3.9 (3.5, 4.35)    | <0.0001        |
| ≥5                     | 479                           | 5.32 (4.79, 5.91)  | <0.0001        |
| <b>Day of the week</b> |                               |                    |                |
| MON                    | 545                           | Reference          | -              |
| TUE                    | 613                           | 0.87 (0.8, 0.96)   | 0.0041         |
| WED                    | 621                           | 1.02 (0.93, 1.12)  | 0.6186         |
| THU                    | 731                           | 0.94 (0.86, 1.04)  | 0.2318         |
| FRI                    | 749                           | 0.94 (0.86, 1.03)  | 0.2177         |
| SAT                    | 704                           | 0.8 (0.73, 0.88)   | <0.0001        |
| SUN                    | 526                           | 0.75 (0.68, 0.82)  | <0.0001        |
| <b>Survey city</b>     |                               |                    |                |
| Wuhan                  | 1449                          | Reference          | -              |
| Changsha               | 832                           | 1.05 (0.98, 1.14)  | 0.1794         |
| Shanghai               | 1371                          | 1.05 (0.97, 1.13)  | 0.2062         |
| Shenzhen               | 837                           | 1.15 (1.06, 1.24)  | 0.0004         |

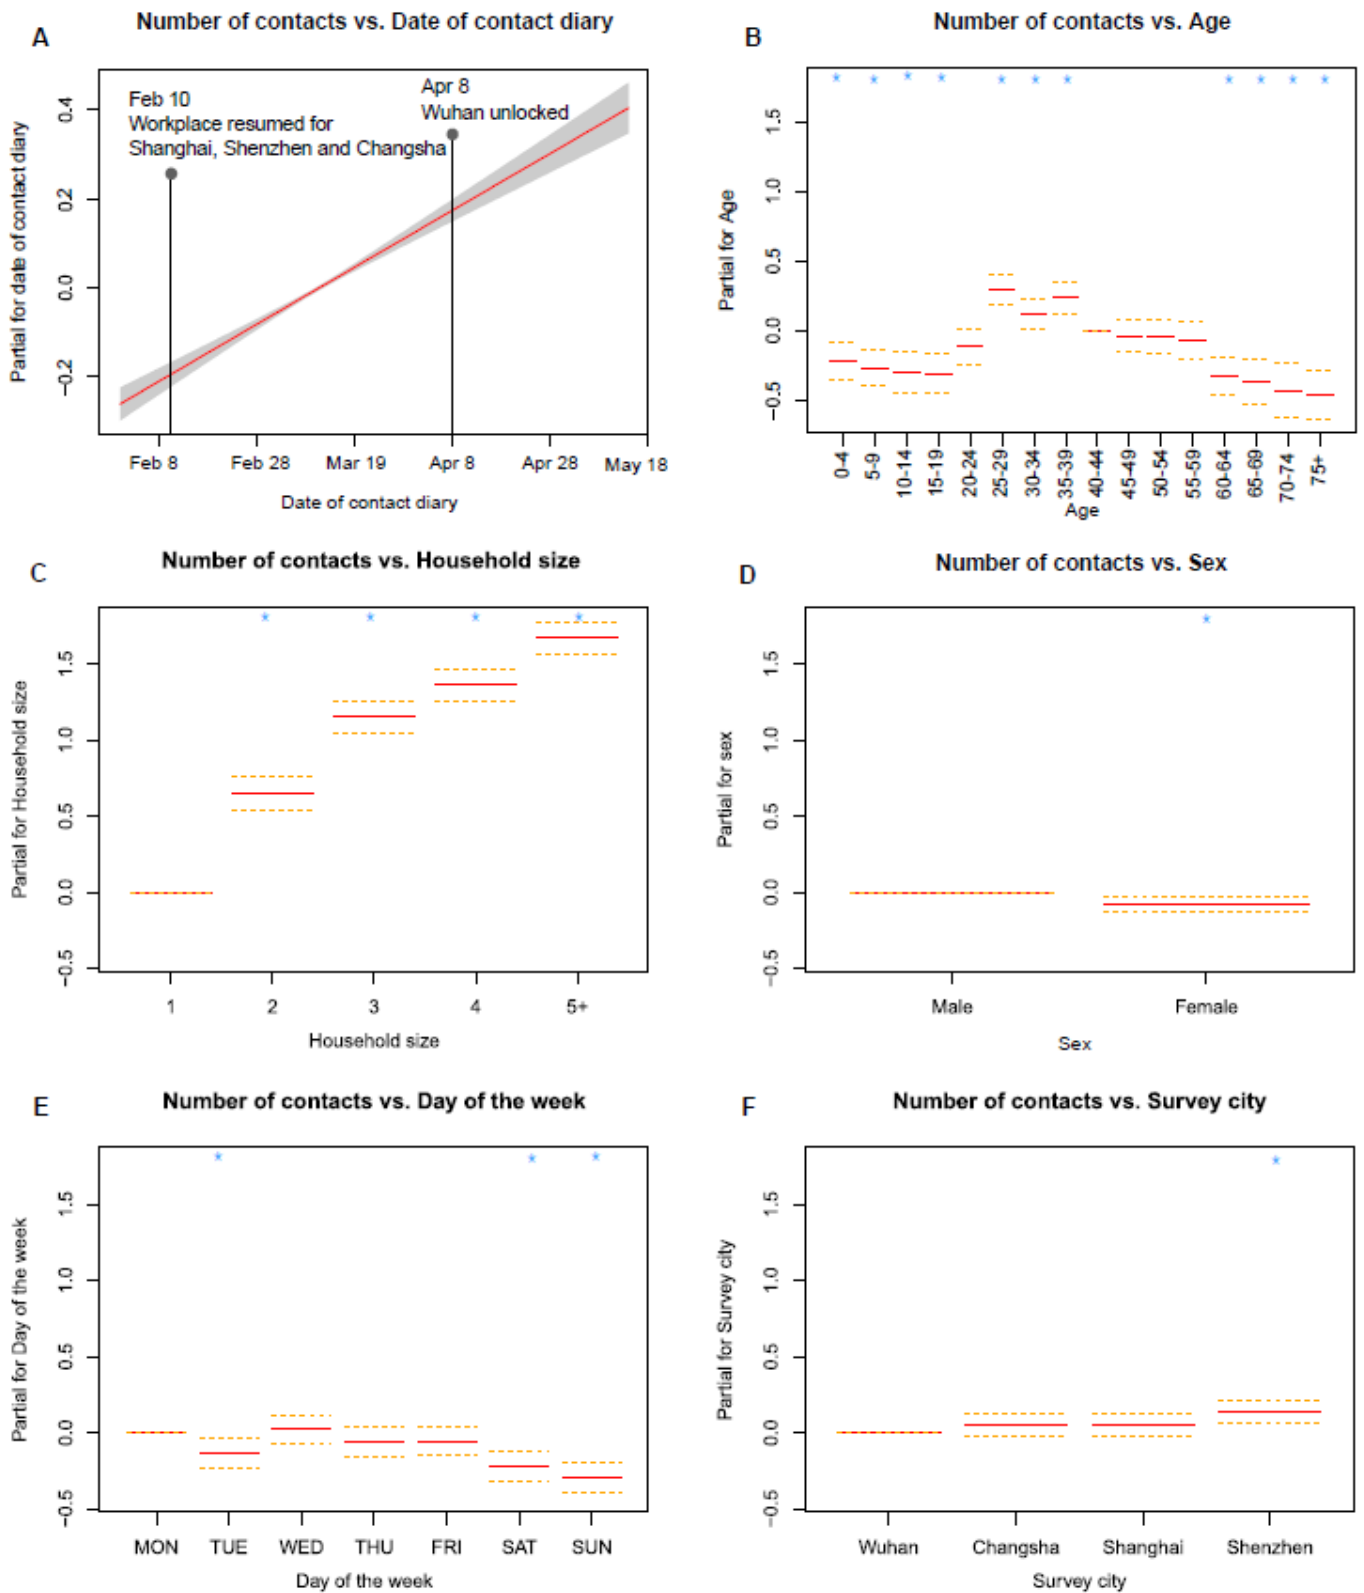

**Figure S10.** Partial effect of date of contact diary, age group, household size, sex, day of the week, and survey city in the regression model. \* denotes significant difference relative to the reference level ( $p$  value  $< 0.05$ ). Shaded region in panel (A) denotes 95% confidence intervals are denoted by a shaded region in (A) and dotted lines in (B-F).



### 3.7 Construction of the contact matrices and related uncertainty

We defined 16 age groups (0-4 y, 5-9 y, 10-14 y, 15-19 y, 20-24 y, 25-29 y, 30-34 y, 35-39 y, 40-44 y, 45-49 y, 50-54 y, 55-59 y, 60-64 y, 65-69 y, 70-74 y, and 75+ y) to build age-specific contact matrices. We estimated the age-specific contact rate per person per day using the “socialmixr” package in R 3.6.0. Contact matrices representing contact patterns during a regular day (referred to as “baseline period contact matrix”), during the COVID-19 outbreak (referred to as “outbreak contact matrix”) and during the post-lockdown (referred to as “post-lockdown contact matrix”) were all estimated for Wuhan, Shanghai, Shenzhen, and Changsha (10). Due to small sample size for 65+ years in Wuhan, the number of age groups was limited to 14 (by aggregating 3 age groups for 65+ years old in a single age group) were used for baseline period contact matrix and outbreak contact matrix (9).

To account for the uncertainty of the contact matrices and sample representativeness, we performed bootstrap sampling with replacement of survey participants weighted by the age distribution of the actual population in each location, and also weighted by the day type of contact diary (2/7 of diaries on Saturday/Sundays, 5/7 from Monday to Friday) for the post-lockdown contact matrix. Each cell of the contact matrix thus represents an average of 100 bootstrapped realizations. All analyses in this study were based on the bootstrapped contact matrices.

## *i Assortativity of contacts*

In order to assess the degree of age assortativity of the estimated contact matrices, we calculated the *q-index*, a measure representing departures from proportionate mixing, ranging from zero (proportionate) to one (fully assortative)(47). In particular,

$$\text{q-index} = \widehat{\lambda}_2 / \widehat{\lambda}_1$$

where  $(\widehat{\lambda}_1, \dots, \widehat{\lambda}_M)$  is the vector of the absolute values of the real part of the eigenvalues of the contact matrix, ordered from the largest (i.e., the dominant eigenvalue) to the smallest.

We found that in Wuhan, age-mixing patterns were slightly more assortative (i.e., contacts mostly with individuals of the same age group) for the baseline period (q-index=0.6, 95% CI: 0.48-0.64) than those during the COVID-19 outbreak (q-index=0.45, 95% CI: 0.41-0.52) and those during the post-lockdown period (q-index=0.44, 95% CI: 0.37-0.51). During the post-lockdown period, participants aged 0-9 years still reported no contacts with individuals of the same age group (see Fig. S11). In Shanghai, a much larger drop in assortativity was found during the COVID-19 outbreak, then an obvious increase was found during the post-lockdown period. For the baseline period, the q-index was 0.8 (95% CI: 0.72-0.87) and it dropped to 0.4 (95% CI: 0.32-0.52) during the outbreak and increased to 0.5 (95% CI: 0.37-0.6). In Shenzhen, a much larger drop in assortativity was also found during the COVID-19 outbreak, but small change was found during the post-lockdown period. The q-index was 0.71 (95% CI: 0.55-0.78), 0.43 (95% CI: 0.39-0.55), and 0.42 (95% CI: 0.37-0.5) for baseline period, outbreak period, and post-lockdown period, respectively. Similar pattern was found for Changsha, where the q-index was 0.6 (95% CI: 0.48-0.86), 0.45 (95% CI: 0.41-0.54), and 0.38 (95% CI: 0.3-0.48) for baseline period, outbreak period, and post-lockdown period, respectively.

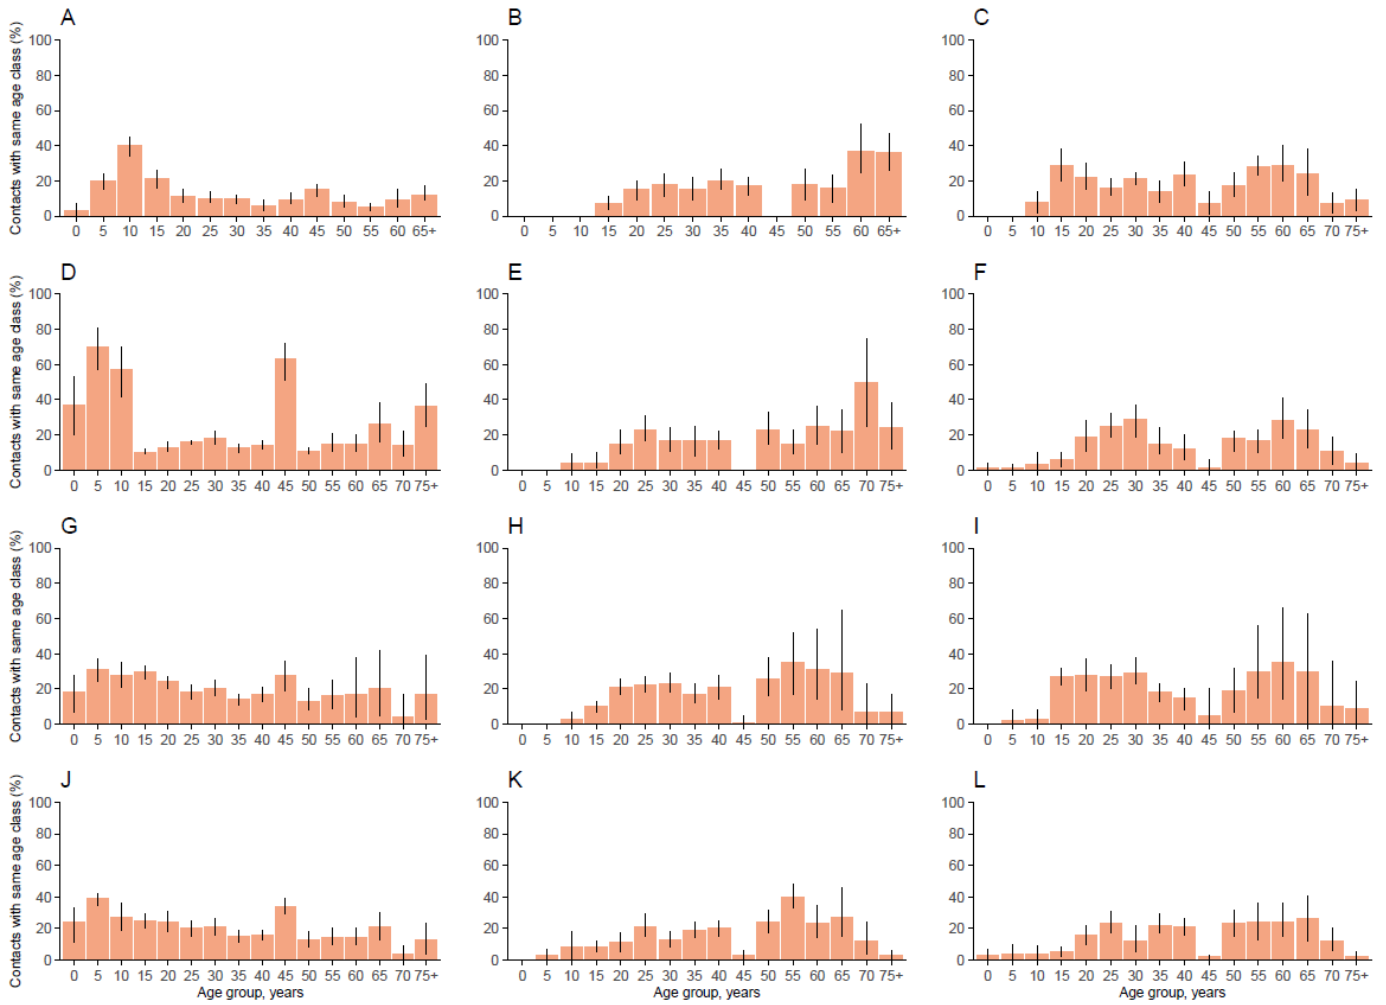

**Figure S11.** *A* The proportion of contacts with the same age class during baseline period in Wuhan. *B* Same as *A*, but for the COVID-19 outbreak period. *C* Same as *A*, but for post-lockdown period. *D-F* Same as *A-C*, but for Shanghai. *G-I* Same as *A-C*, but for Shenzhen. *J-L* Same as *A-C*, but for Changsha. The vertical lines correspond to the 95% bootstrapped CI.

ii. *Contact matrix data*

The mean of 100 bootstrapped contact matrices for the baseline period, for the COVID-19 outbreak, and for the post-lockdown period, all for Wuhan, Shanghai, Shenzhen and Changsha are provided in Tab. S23-S30. The baseline and outbreak contact matrices for Wuhan and Shanghai have been presented in our previous study(9).

**Table S23.** *Contact matrix (5-year age bands) of reported contacts for participants in Wuhan during post-lockdown period, consisting of the average number of contacts per day recorded by the survey participant, stratified by the age group of the contact.*

|                    |       | Age of contact |      |       |       |       |       |       |       |       |       |       |       |       |       |       |      |
|--------------------|-------|----------------|------|-------|-------|-------|-------|-------|-------|-------|-------|-------|-------|-------|-------|-------|------|
|                    |       | 0-4            | 5-9  | 10-14 | 15-19 | 20-24 | 25-29 | 30-34 | 35-39 | 40-44 | 45-49 | 50-54 | 55-59 | 60-64 | 65-69 | 70-74 | 75+  |
| Age of participant | 0-4   | 0.00           | 0.00 | 0.04  | 0.00  | 0.02  | 0.84  | 0.57  | 0.31  | 0.07  | 0.00  | 0.21  | 0.15  | 0.18  | 0.02  | 0.10  | 0.11 |
|                    | 5-9   | 0.07           | 0.20 | 0.00  | 0.00  | 0.02  | 0.24  | 0.65  | 0.78  | 0.16  | 0.05  | 0.06  | 0.23  | 0.16  | 0.16  | 0.11  | 0.06 |
|                    | 10-14 | 0.03           | 0.03 | 0.00  | 0.01  | 0.01  | 0.00  | 0.20  | 0.71  | 0.72  | 0.16  | 0.03  | 0.01  | 0.14  | 0.10  | 0.09  | 0.03 |
|                    | 15-19 | 0.00           | 0.00 | 0.00  | 0.21  | 0.03  | 0.00  | 0.00  | 0.11  | 0.55  | 1.17  | 0.20  | 0.04  | 0.03  | 0.03  | 0.10  | 0.20 |
|                    | 20-24 | 0.11           | 0.06 | 0.00  | 0.05  | 1.29  | 0.40  | 0.22  | 0.21  | 0.32  | 1.00  | 0.25  | 0.17  | 0.10  | 0.06  | 0.00  | 0.17 |
|                    | 25-29 | 0.45           | 0.15 | 0.04  | 0.04  | 0.24  | 0.97  | 0.68  | 0.34  | 0.26  | 0.23  | 0.29  | 0.29  | 0.21  | 0.08  | 0.08  | 0.11 |
|                    | 30-34 | 0.29           | 0.43 | 0.09  | 0.00  | 0.22  | 0.68  | 0.71  | 0.67  | 0.32  | 0.25  | 0.16  | 0.31  | 0.28  | 0.09  | 0.00  | 0.04 |
|                    | 35-39 | 0.14           | 0.32 | 0.47  | 0.03  | 0.47  | 0.53  | 0.69  | 1.11  | 0.64  | 0.32  | 0.11  | 0.07  | 0.16  | 0.14  | 0.09  | 0.04 |
|                    | 40-44 | 0.08           | 0.10 | 0.48  | 0.25  | 0.25  | 0.27  | 0.26  | 0.57  | 0.63  | 0.64  | 0.30  | 0.20  | 0.04  | 0.13  | 0.11  | 0.17 |
|                    | 45-49 | 0.03           | 0.02 | 0.16  | 0.35  | 0.37  | 0.17  | 0.17  | 0.24  | 0.52  | 0.90  | 0.39  | 0.12  | 0.04  | 0.06  | 0.07  | 0.21 |
|                    | 50-54 | 0.08           | 0.01 | 0.01  | 0.07  | 0.42  | 0.46  | 0.27  | 0.31  | 0.27  | 0.41  | 0.61  | 0.22  | 0.03  | 0.02  | 0.01  | 0.40 |
|                    | 55-59 | 0.00           | 0.17 | 0.00  | 0.00  | 0.00  | 0.21  | 0.22  | 0.01  | 0.27  | 0.22  | 0.22  | 0.71  | 0.13  | 0.08  | 0.03  | 0.29 |
|                    | 60-64 | 0.07           | 0.04 | 0.04  | 0.02  | 0.00  | 0.12  | 0.25  | 0.12  | 0.09  | 0.09  | 0.05  | 0.18  | 0.58  | 0.22  | 0.01  | 0.14 |
|                    | 65-69 | 0.00           | 0.11 | 0.13  | 0.00  | 0.00  | 0.05  | 0.11  | 0.00  | 0.24  | 0.04  | 0.00  | 0.04  | 0.42  | 0.41  | 0.00  | 0.13 |
| 70-74              | 0.07  | 0.12           | 0.21 | 0.17  | 0.03  | 0.20  | 0.16  | 0.40  | 0.62  | 0.30  | 0.15  | 0.05  | 0.00  | 0.18  | 0.22  | 0.00  |      |
| 75+                | 0.06  | 0.06           | 0.02 | 0.06  | 0.25  | 0.18  | 0.04  | 0.04  | 0.09  | 0.46  | 0.58  | 0.28  | 0.23  | 0.11  | 0.02  | 0.23  |      |

**Table S24.** Contact matrix (5-year age bands) of reported contacts for participants in Shanghai during post-lockdown period, consisting of the average number of contacts per day recorded by the survey participant, stratified by the age group of the contact.

|                    |       | Age of contact |      |       |       |       |       |       |       |       |       |       |       |       |       |       |      |
|--------------------|-------|----------------|------|-------|-------|-------|-------|-------|-------|-------|-------|-------|-------|-------|-------|-------|------|
|                    |       | 0-4            | 5-9  | 10-14 | 15-19 | 20-24 | 25-29 | 30-34 | 35-39 | 40-44 | 45-49 | 50-54 | 55-59 | 60-64 | 65-69 | 70-74 | 75+  |
| Age of participant | 0-4   | 0.03           | 0.02 | 0.00  | 0.00  | 0.02  | 0.66  | 0.71  | 0.46  | 0.06  | 0.02  | 0.15  | 0.15  | 0.21  | 0.16  | 0.12  | 0.02 |
|                    | 5-9   | 0.00           | 0.02 | 0.00  | 0.02  | 0.01  | 0.11  | 0.60  | 0.76  | 0.28  | 0.04  | 0.08  | 0.14  | 0.07  | 0.12  | 0.03  | 0.02 |
|                    | 10-14 | 0.05           | 0.00 | 0.02  | 0.00  | 0.00  | 0.05  | 0.08  | 0.70  | 0.48  | 0.19  | 0.21  | 0.05  | 0.05  | 0.18  | 0.00  | 0.04 |
|                    | 15-19 | 0.00           | 0.01 | 0.01  | 0.08  | 0.07  | 0.07  | 0.10  | 0.21  | 0.33  | 0.53  | 0.47  | 0.19  | 0.08  | 0.05  | 0.08  | 0.02 |
|                    | 20-24 | 0.07           | 0.00 | 0.00  | 0.16  | 0.16  | 0.19  | 0.13  | 0.10  | 0.33  | 0.69  | 0.50  | 0.29  | 0.00  | 0.00  | 0.00  | 0.10 |
|                    | 25-29 | 0.28           | 0.10 | 0.02  | 0.04  | 0.30  | 0.67  | 0.57  | 0.51  | 0.16  | 0.13  | 0.18  | 0.24  | 0.20  | 0.08  | 0.00  | 0.00 |
|                    | 30-34 | 0.40           | 0.14 | 0.08  | 0.00  | 0.13  | 0.45  | 0.75  | 0.39  | 0.07  | 0.06  | 0.11  | 0.06  | 0.21  | 0.10  | 0.00  | 0.00 |
|                    | 35-39 | 0.17           | 0.29 | 0.28  | 0.06  | 0.17  | 0.18  | 1.23  | 1.29  | 0.13  | 0.00  | 0.12  | 0.13  | 0.05  | 0.13  | 0.08  | 0.01 |
|                    | 40-44 | 0.10           | 0.18 | 0.28  | 0.11  | 0.10  | 0.20  | 0.27  | 0.45  | 0.43  | 0.28  | 0.06  | 0.05  | 0.09  | 0.18  | 0.04  | 0.05 |
|                    | 45-49 | 0.00           | 0.06 | 0.23  | 0.34  | 0.27  | 0.12  | 0.23  | 0.27  | 0.24  | 0.53  | 0.45  | 0.42  | 0.05  | 0.16  | 0.35  | 0.91 |
|                    | 50-54 | 0.02           | 0.02 | 0.03  | 0.23  | 0.32  | 0.23  | 0.23  | 0.17  | 0.32  | 0.50  | 0.57  | 0.22  | 0.03  | 0.01  | 0.07  | 0.28 |
|                    | 55-59 | 0.03           | 0.04 | 0.04  | 0.00  | 0.11  | 0.21  | 0.36  | 0.02  | 0.16  | 0.03  | 0.18  | 0.34  | 0.47  | 0.05  | 0.00  | 0.00 |
|                    | 60-64 | 0.05           | 0.04 | 0.00  | 0.01  | 0.01  | 0.15  | 0.25  | 0.14  | 0.03  | 0.01  | 0.05  | 0.28  | 0.50  | 0.18  | 0.00  | 0.09 |
|                    | 65-69 | 0.09           | 0.03 | 0.03  | 0.00  | 0.00  | 0.00  | 0.21  | 0.31  | 0.05  | 0.06  | 0.00  | 0.10  | 0.43  | 0.40  | 0.03  | 0.00 |
| 70-74              | 0.07  | 0.07           | 0.07 | 0.09  | 0.05  | 0.03  | 0.15  | 0.47  | 0.39  | 0.26  | 0.12  | 0.03  | 0.05  | 0.15  | 0.26  | 0.04  |      |
| 75+                | 0.00  | 0.10           | 0.05 | 0.05  | 0.09  | 0.23  | 0.02  | 0.16  | 0.24  | 0.36  | 0.38  | 0.29  | 0.04  | 0.00  | 0.05  | 0.08  |      |

**Table S25.** Contact matrix (5-year age bands) of reported contacts for participants in Shenzhen during baseline period, consisting of the average number of contacts per day recorded by the survey participant, stratified by the age group of the contact.

|                    |       | Age of contact |      |       |       |       |       |       |       |       |       |       |       |       |       |       |      |
|--------------------|-------|----------------|------|-------|-------|-------|-------|-------|-------|-------|-------|-------|-------|-------|-------|-------|------|
|                    |       | 0-4            | 5-9  | 10-14 | 15-19 | 20-24 | 25-29 | 30-34 | 35-39 | 40-44 | 45-49 | 50-54 | 55-59 | 60-64 | 65-69 | 70-74 | 75+  |
| Age of participant | 0-4   | 0.80           | 0.78 | 0.00  | 0.00  | 0.31  | 0.35  | 0.52  | 0.53  | 0.19  | 0.19  | 0.25  | 0.24  | 0.08  | 0.08  | 0.00  | 0.00 |
|                    | 5-9   | 3.69           | 3.71 | 0.33  | 0.32  | 0.41  | 0.39  | 1.33  | 1.34  | 0.49  | 0.47  | 0.18  | 0.19  | 0.13  | 0.12  | 0.02  | 0.06 |
|                    | 10-14 | 0.00           | 0.00 | 4.17  | 4.21  | 0.19  | 0.19  | 1.46  | 1.42  | 0.68  | 0.71  | 0.09  | 0.09  | 0.07  | 0.09  | 0.02  | 0.06 |
|                    | 15-19 | 0.01           | 0.01 | 2.73  | 2.68  | 0.59  | 0.58  | 0.59  | 0.59  | 0.57  | 0.56  | 0.29  | 0.30  | 0.00  | 0.00  | 0.02  | 0.04 |
|                    | 20-24 | 0.21           | 0.21 | 0.22  | 0.22  | 2.32  | 2.33  | 0.37  | 0.36  | 0.50  | 0.51  | 0.18  | 0.17  | 0.02  | 0.02  | 0.02  | 0.06 |
|                    | 25-29 | 0.45           | 0.45 | 0.03  | 0.03  | 2.08  | 2.09  | 1.12  | 1.13  | 0.27  | 0.27  | 0.45  | 0.43  | 0.00  | 0.00  | 0.00  | 0.00 |
|                    | 30-34 | 0.27           | 0.28 | 0.08  | 0.08  | 1.14  | 1.14  | 1.46  | 1.46  | 0.52  | 0.53  | 0.38  | 0.37  | 0.09  | 0.09  | 0.02  | 0.06 |
|                    | 35-39 | 0.19           | 0.18 | 0.18  | 0.18  | 0.59  | 0.59  | 1.45  | 1.44  | 0.67  | 0.68  | 0.14  | 0.14  | 0.24  | 0.26  | 0.02  | 0.08 |
|                    | 40-44 | 0.14           | 0.15 | 0.26  | 0.26  | 0.67  | 0.66  | 1.46  | 1.46  | 1.16  | 1.13  | 0.28  | 0.29  | 0.06  | 0.07  | 0.03  | 0.09 |
|                    | 45-49 | 0.00           | 0.00 | 0.23  | 0.25  | 1.24  | 1.25  | 1.87  | 1.86  | 2.30  | 2.31  | 0.76  | 0.76  | 0.24  | 0.24  | 0.07  | 0.22 |
|                    | 50-54 | 0.07           | 0.08 | 0.09  | 0.10  | 0.93  | 0.92  | 1.00  | 1.00  | 0.92  | 0.90  | 1.06  | 1.07  | 0.05  | 0.05  | 0.05  | 0.16 |
|                    | 55-59 | 0.06           | 0.06 | 0.03  | 0.03  | 0.76  | 0.71  | 0.37  | 0.41  | 0.35  | 0.30  | 0.78  | 0.78  | 0.17  | 0.17  | 0.02  | 0.07 |
|                    | 60-64 | 0.07           | 0.06 | 0.06  | 0.04  | 0.20  | 0.20  | 0.41  | 0.41  | 0.34  | 0.33  | 0.29  | 0.29  | 0.73  | 0.70  | 0.03  | 0.11 |
|                    | 65-69 | 0.09           | 0.07 | 0.03  | 0.02  | 0.49  | 0.48  | 0.42  | 0.38  | 0.40  | 0.38  | 0.09  | 0.13  | 1.01  | 0.93  | 0.07  | 0.16 |
| 70-74              | 0.06  | 0.05           | 0.10 | 0.11  | 0.24  | 0.20  | 0.37  | 0.37  | 0.62  | 0.61  | 0.23  | 0.29  | 0.32  | 0.31  | 0.27  | 0.95  |      |
| 75+                | 0.02  | 0.02           | 0.13 | 0.09  | 0.33  | 0.36  | 0.30  | 0.25  | 0.58  | 0.55  | 0.49  | 0.50  | 0.32  | 0.35  | 0.36  | 1.00  |      |

**Table S26.** Contact matrix (5-year age bands) of reported contacts for participants in Shenzhen during outbreak period, consisting of the average number of contacts per day recorded by the survey participant, stratified by the age group of the contact.

|                    |       | Age of contact |      |       |       |       |       |       |       |       |       |       |       |       |       |       |      |
|--------------------|-------|----------------|------|-------|-------|-------|-------|-------|-------|-------|-------|-------|-------|-------|-------|-------|------|
|                    |       | 0-4            | 5-9  | 10-14 | 15-19 | 20-24 | 25-29 | 30-34 | 35-39 | 40-44 | 45-49 | 50-54 | 55-59 | 60-64 | 65-69 | 70-74 | 75+  |
| Age of participant | 0-4   | 0.00           | 0.00 | 0.00  | 0.00  | 0.00  | 0.77  | 0.45  | 0.31  | 0.25  | 0.07  | 0.17  | 0.39  | 0.08  | 0.06  | 0.00  | 0.00 |
|                    | 5-9   | 0.00           | 0.03 | 0.06  | 0.06  | 0.03  | 0.11  | 0.43  | 0.61  | 0.45  | 0.11  | 0.19  | 0.10  | 0.11  | 0.06  | 0.07  | 0.07 |
|                    | 10-14 | 0.00           | 0.00 | 0.00  | 0.03  | 0.06  | 0.05  | 0.10  | 0.71  | 0.62  | 0.27  | 0.13  | 0.06  | 0.03  | 0.16  | 0.12  | 0.00 |
|                    | 15-19 | 0.00           | 0.04 | 0.06  | 0.09  | 0.26  | 0.20  | 0.22  | 0.25  | 0.46  | 0.46  | 0.42  | 0.13  | 0.00  | 0.00  | 0.01  | 0.07 |
|                    | 20-24 | 0.02           | 0.00 | 0.04  | 0.07  | 0.18  | 0.07  | 0.00  | 0.02  | 0.25  | 0.60  | 0.32  | 0.07  | 0.04  | 0.02  | 0.02  | 0.05 |
|                    | 25-29 | 0.10           | 0.10 | 0.00  | 0.02  | 0.08  | 0.36  | 0.11  | 0.05  | 0.12  | 0.13  | 0.19  | 0.39  | 0.01  | 0.02  | 0.03  | 0.00 |
|                    | 30-34 | 0.12           | 0.18 | 0.07  | 0.00  | 0.10  | 0.09  | 0.38  | 0.09  | 0.08  | 0.04  | 0.10  | 0.32  | 0.06  | 0.07  | 0.05  | 0.00 |
|                    | 35-39 | 0.02           | 0.32 | 0.26  | 0.03  | 0.00  | 0.02  | 0.13  | 0.44  | 0.18  | 0.00  | 0.03  | 0.16  | 0.17  | 0.11  | 0.05  | 0.04 |
|                    | 40-44 | 0.06           | 0.21 | 0.27  | 0.17  | 0.17  | 0.24  | 0.08  | 0.25  | 0.38  | 0.12  | 0.02  | 0.01  | 0.05  | 0.09  | 0.10  | 0.02 |
|                    | 45-49 | 0.00           | 0.00 | 0.16  | 0.36  | 0.28  | 0.15  | 0.04  | 0.09  | 0.20  | 0.43  | 0.21  | 0.00  | 0.00  | 0.00  | 0.15  | 0.00 |
|                    | 50-54 | 0.04           | 0.12 | 0.03  | 0.10  | 0.20  | 0.25  | 0.11  | 0.06  | 0.08  | 0.08  | 0.51  | 0.14  | 0.03  | 0.03  | 0.06  | 0.14 |
|                    | 55-59 | 0.07           | 0.04 | 0.04  | 0.00  | 0.19  | 0.04  | 0.22  | 0.04  | 0.08  | 0.04  | 0.04  | 0.58  | 0.23  | 0.00  | 0.00  | 0.08 |
|                    | 60-64 | 0.06           | 0.06 | 0.04  | 0.04  | 0.09  | 0.05  | 0.27  | 0.15  | 0.09  | 0.06  | 0.10  | 0.17  | 0.58  | 0.10  | 0.00  | 0.10 |
|                    | 65-69 | 0.06           | 0.17 | 0.00  | 0.05  | 0.00  | 0.00  | 0.06  | 0.04  | 0.26  | 0.00  | 0.00  | 0.00  | 0.35  | 0.41  | 0.10  | 0.00 |
| 70-74              | 0.02  | 0.06           | 0.08 | 0.13  | 0.21  | 0.15  | 0.10  | 0.20  | 0.33  | 0.37  | 0.24  | 0.07  | 0.00  | 0.14  | 0.16  | 0.10  |      |
| 75+                | 0.04  | 0.03           | 0.07 | 0.16  | 0.21  | 0.40  | 0.09  | 0.09  | 0.27  | 0.40  | 0.73  | 0.20  | 0.11  | 0.02  | 0.29  | 0.24  |      |

**Table S27.** Contact matrix (5-year age bands) of reported contacts for participants in Shenzhen during post-lockdown period, consisting of the average number of contacts per day recorded by the survey participant, stratified by the age group of the contact.

|                    |       | Age of contact |      |       |       |       |       |       |       |       |       |       |       |       |       |       |      |
|--------------------|-------|----------------|------|-------|-------|-------|-------|-------|-------|-------|-------|-------|-------|-------|-------|-------|------|
|                    |       | 0-4            | 5-9  | 10-14 | 15-19 | 20-24 | 25-29 | 30-34 | 35-39 | 40-44 | 45-49 | 50-54 | 55-59 | 60-64 | 65-69 | 70-74 | 75+  |
| Age of participant | 0-4   | 0.00           | 0.00 | 0.00  | 0.00  | 0.00  | 0.63  | 0.47  | 0.44  | 0.14  | 0.12  | 0.08  | 0.23  | 0.11  | 0.10  | 0.00  | 0.00 |
|                    | 5-9   | 0.00           | 0.13 | 0.05  | 0.06  | 0.03  | 0.14  | 0.46  | 0.60  | 0.47  | 0.10  | 0.16  | 0.05  | 0.12  | 0.04  | 0.07  | 0.05 |
|                    | 10-14 | 0.00           | 0.00 | 0.05  | 0.02  | 0.05  | 0.10  | 0.19  | 0.74  | 0.60  | 0.20  | 0.20  | 0.07  | 0.02  | 0.08  | 0.10  | 0.00 |
|                    | 15-19 | 0.00           | 0.06 | 0.02  | 0.07  | 0.13  | 0.12  | 0.24  | 0.23  | 0.37  | 0.43  | 0.38  | 0.08  | 0.00  | 0.00  | 0.02  | 0.04 |
|                    | 20-24 | 0.02           | 0.00 | 0.02  | 0.04  | 0.68  | 0.51  | 0.12  | 0.14  | 0.24  | 0.41  | 0.17  | 0.02  | 0.05  | 0.02  | 0.02  | 0.04 |
|                    | 25-29 | 0.51           | 0.15 | 0.01  | 0.02  | 0.36  | 1.05  | 0.60  | 0.26  | 0.10  | 0.15  | 0.18  | 0.40  | 0.00  | 0.01  | 0.00  | 0.00 |
|                    | 30-34 | 0.10           | 0.21 | 0.09  | 0.00  | 0.18  | 0.32  | 0.71  | 0.22  | 0.23  | 0.07  | 0.08  | 0.27  | 0.03  | 0.03  | 0.06  | 0.00 |
|                    | 35-39 | 0.02           | 0.36 | 0.24  | 0.00  | 0.20  | 0.12  | 0.55  | 0.87  | 0.28  | 0.11  | 0.02  | 0.00  | 0.02  | 0.09  | 0.04  | 0.05 |
|                    | 40-44 | 0.05           | 0.21 | 0.28  | 0.17  | 0.16  | 0.18  | 0.18  | 0.42  | 0.48  | 0.20  | 0.05  | 0.00  | 0.07  | 0.11  | 0.11  | 0.01 |
|                    | 45-49 | 0.00           | 0.00 | 0.15  | 0.40  | 0.50  | 0.42  | 0.43  | 0.46  | 0.32  | 0.50  | 0.23  | 0.00  | 0.00  | 0.00  | 0.07  | 0.00 |
|                    | 50-54 | 0.02           | 0.10 | 0.02  | 0.08  | 0.24  | 0.23  | 0.57  | 0.19  | 0.26  | 0.21  | 0.51  | 0.14  | 0.04  | 0.01  | 0.05  | 0.13 |
|                    | 55-59 | 0.09           | 0.04 | 0.00  | 0.00  | 0.20  | 0.03  | 0.24  | 0.07  | 0.13  | 0.13  | 0.14  | 0.57  | 0.22  | 0.03  | 0.00  | 0.15 |
|                    | 60-64 | 0.05           | 0.06 | 0.04  | 0.05  | 0.05  | 0.09  | 0.21  | 0.11  | 0.12  | 0.03  | 0.05  | 0.21  | 0.67  | 0.13  | 0.01  | 0.12 |
|                    | 65-69 | 0.07           | 0.11 | 0.00  | 0.08  | 0.00  | 0.00  | 0.00  | 0.02  | 0.21  | 0.00  | 0.00  | 0.00  | 0.37  | 0.39  | 0.09  | 0.00 |
| 70-74              | 0.02  | 0.08           | 0.10 | 0.13  | 0.21  | 0.16  | 0.05  | 0.17  | 0.42  | 0.38  | 0.14  | 0.04  | 0.00  | 0.15  | 0.24  | 0.09  |      |
| 75+                | 0.02  | 0.03           | 0.04 | 0.17  | 0.22  | 0.32  | 0.05  | 0.06  | 0.31  | 0.32  | 0.70  | 0.21  | 0.10  | 0.00  | 0.14  | 0.27  |      |



**Table S28.** Contact matrix (5-year age bands) of reported contacts for participants in Changsha during baseline period, consisting of the average number of contacts per day recorded by the survey participant, stratified by the age group of the contact.

|                    |       | Age of contact |      |       |       |       |       |       |       |       |       |       |       |       |       |       |      |
|--------------------|-------|----------------|------|-------|-------|-------|-------|-------|-------|-------|-------|-------|-------|-------|-------|-------|------|
|                    |       | 0-4            | 5-9  | 10-14 | 15-19 | 20-24 | 25-29 | 30-34 | 35-39 | 40-44 | 45-49 | 50-54 | 55-59 | 60-64 | 65-69 | 70-74 | 75+  |
| Age of participant | 0-4   | 1.93           | 1.92 | 0.00  | 0.00  | 0.48  | 0.49  | 1.02  | 1.03  | 0.15  | 0.15  | 0.18  | 0.19  | 0.13  | 0.13  | 0.02  | 0.05 |
|                    | 5-9   | 5.42           | 5.50 | 0.10  | 0.10  | 0.59  | 0.58  | 1.27  | 1.30  | 0.27  | 0.27  | 0.18  | 0.20  | 0.08  | 0.09  | 0.02  | 0.05 |
|                    | 10-14 | 0.02           | 0.02 | 10.85 | 10.85 | 0.62  | 0.65  | 1.11  | 1.09  | 1.13  | 1.17  | 0.15  | 0.15  | 0.00  | 0.00  | 0.00  | 0.00 |
|                    | 15-19 | 0.01           | 0.01 | 3.30  | 3.34  | 0.95  | 0.96  | 0.52  | 0.55  | 0.94  | 0.91  | 0.35  | 0.34  | 0.07  | 0.08  | 0.00  | 0.00 |
|                    | 20-24 | 0.18           | 0.18 | 0.64  | 0.63  | 2.42  | 2.39  | 0.91  | 0.91  | 0.61  | 0.59  | 0.14  | 0.13  | 0.02  | 0.02  | 0.01  | 0.02 |
|                    | 25-29 | 0.13           | 0.13 | 0.01  | 0.01  | 1.77  | 1.83  | 1.05  | 1.04  | 0.46  | 0.46  | 0.34  | 0.35  | 0.03  | 0.04  | 0.00  | 0.00 |
|                    | 30-34 | 0.65           | 0.63 | 0.56  | 0.56  | 1.01  | 1.02  | 2.34  | 2.34  | 0.51  | 0.49  | 0.41  | 0.41  | 0.30  | 0.33  | 0.01  | 0.03 |
|                    | 35-39 | 0.35           | 0.35 | 0.07  | 0.07  | 0.69  | 0.70  | 1.51  | 1.49  | 0.41  | 0.40  | 0.18  | 0.17  | 0.23  | 0.24  | 0.02  | 0.08 |
|                    | 40-44 | 0.37           | 0.36 | 0.49  | 0.49  | 0.82  | 0.82  | 1.68  | 1.68  | 1.75  | 1.73  | 0.37  | 0.37  | 0.31  | 0.32  | 0.03  | 0.11 |
|                    | 45-49 | 0.12           | 0.12 | 0.19  | 0.20  | 1.15  | 1.12  | 0.50  | 0.48  | 1.38  | 1.38  | 0.14  | 0.15  | 0.28  | 0.28  | 0.27  | 0.91 |
|                    | 50-54 | 0.07           | 0.06 | 0.08  | 0.10  | 0.63  | 0.61  | 0.77  | 0.75  | 0.89  | 0.87  | 0.91  | 0.96  | 0.14  | 0.13  | 0.06  | 0.21 |
|                    | 55-59 | 0.02           | 0.02 | 0.11  | 0.11  | 1.14  | 1.14  | 1.00  | 0.98  | 1.11  | 1.09  | 1.30  | 1.30  | 0.15  | 0.16  | 0.03  | 0.10 |
|                    | 60-64 | 0.04           | 0.04 | 0.04  | 0.03  | 0.28  | 0.28  | 0.52  | 0.51  | 0.64  | 0.64  | 0.71  | 0.71  | 0.91  | 0.91  | 0.03  | 0.10 |
|                    | 65-69 | 0.00           | 0.00 | 0.05  | 0.05  | 0.10  | 0.09  | 0.77  | 0.77  | 0.57  | 0.57  | 0.42  | 0.40  | 1.38  | 1.36  | 0.03  | 0.10 |
| 70-74              | 0.05  | 0.05           | 0.06 | 0.06  | 0.11  | 0.10  | 0.33  | 0.34  | 0.76  | 0.73  | 0.23  | 0.23  | 0.42  | 0.44  | 0.17  | 0.59  |      |
| 75+                | 0.03  | 0.03           | 0.04 | 0.04  | 0.19  | 0.20  | 0.30  | 0.31  | 0.56  | 0.55  | 0.54  | 0.54  | 0.46  | 0.49  | 0.21  | 0.68  |      |

**Table S29.** Contact matrix (5-year age bands) of reported contacts for participants in Changsha during outbreak period, consisting of the average number of contacts per day recorded by the survey participant, stratified by the age group of the contact.

|                    |       | Age of contact |      |       |       |       |       |       |       |       |       |       |       |       |       |       |      |
|--------------------|-------|----------------|------|-------|-------|-------|-------|-------|-------|-------|-------|-------|-------|-------|-------|-------|------|
|                    |       | 0-4            | 5-9  | 10-14 | 15-19 | 20-24 | 25-29 | 30-34 | 35-39 | 40-44 | 45-49 | 50-54 | 55-59 | 60-64 | 65-69 | 70-74 | 75+  |
| Age of participant | 0-4   | 0.00           | 0.00 | 0.00  | 0.00  | 0.05  | 0.57  | 0.93  | 0.15  | 0.20  | 0.09  | 0.09  | 0.21  | 0.14  | 0.02  | 0.06  | 0.00 |
|                    | 5-9   | 0.04           | 0.07 | 0.05  | 0.01  | 0.04  | 0.08  | 0.77  | 0.71  | 0.30  | 0.05  | 0.05  | 0.16  | 0.13  | 0.12  | 0.05  | 0.00 |
|                    | 10-14 | 0.03           | 0.03 | 0.07  | 0.00  | 0.00  | 0.00  | 0.14  | 0.48  | 0.86  | 0.34  | 0.10  | 0.06  | 0.11  | 0.11  | 0.00  | 0.00 |
|                    | 15-19 | 0.01           | 0.00 | 0.07  | 0.16  | 0.07  | 0.03  | 0.02  | 0.11  | 0.54  | 0.66  | 0.23  | 0.06  | 0.02  | 0.02  | 0.00  | 0.01 |
|                    | 20-24 | 0.06           | 0.04 | 0.03  | 0.13  | 0.17  | 0.14  | 0.05  | 0.03  | 0.27  | 0.74  | 0.18  | 0.09  | 0.05  | 0.05  | 0.00  | 0.05 |
|                    | 25-29 | 0.20           | 0.11 | 0.02  | 0.01  | 0.12  | 0.21  | 0.19  | 0.06  | 0.09  | 0.16  | 0.44  | 0.21  | 0.04  | 0.02  | 0.00  | 0.07 |
|                    | 30-34 | 0.21           | 0.47 | 0.07  | 0.06  | 0.07  | 0.08  | 0.51  | 0.25  | 0.05  | 0.13  | 0.19  | 0.23  | 0.13  | 0.03  | 0.00  | 0.04 |
|                    | 35-39 | 0.18           | 0.40 | 0.13  | 0.03  | 0.06  | 0.08  | 0.22  | 0.30  | 0.22  | 0.03  | 0.00  | 0.10  | 0.28  | 0.20  | 0.03  | 0.00 |
|                    | 40-44 | 0.09           | 0.20 | 0.38  | 0.19  | 0.02  | 0.01  | 0.06  | 0.16  | 0.40  | 0.26  | 0.01  | 0.01  | 0.09  | 0.14  | 0.10  | 0.04 |
|                    | 45-49 | 0.06           | 0.09 | 0.21  | 0.09  | 0.25  | 0.10  | 0.06  | 0.06  | 0.23  | 0.46  | 0.12  | 0.12  | 0.05  | 0.19  | 0.20  | 0.03 |
|                    | 50-54 | 0.05           | 0.07 | 0.08  | 0.16  | 0.23  | 0.17  | 0.11  | 0.06  | 0.04  | 0.21  | 0.47  | 0.20  | 0.00  | 0.01  | 0.05  | 0.10 |
|                    | 55-59 | 0.05           | 0.00 | 0.04  | 0.04  | 0.04  | 0.09  | 0.17  | 0.08  | 0.00  | 0.18  | 0.15  | 0.82  | 0.17  | 0.12  | 0.00  | 0.09 |
|                    | 60-64 | 0.02           | 0.06 | 0.04  | 0.00  | 0.03  | 0.11  | 0.20  | 0.13  | 0.08  | 0.01  | 0.05  | 0.32  | 0.37  | 0.19  | 0.00  | 0.05 |
|                    | 65-69 | 0.00           | 0.00 | 0.04  | 0.04  | 0.00  | 0.00  | 0.10  | 0.13  | 0.08  | 0.09  | 0.00  | 0.00  | 0.31  | 0.35  | 0.09  | 0.09 |
| 70-74              | 0.02  | 0.07           | 0.09 | 0.03  | 0.11  | 0.06  | 0.18  | 0.15  | 0.16  | 0.39  | 0.12  | 0.11  | 0.03  | 0.29  | 0.25  | 0.01  |      |
| 75+                | 0.05  | 0.03           | 0.00 | 0.11  | 0.05  | 0.27  | 0.16  | 0.12  | 0.13  | 0.40  | 0.58  | 0.41  | 0.14  | 0.05  | 0.20  | 0.07  |      |

**Table S30.** Contact matrix (5-year age bands) of reported contacts for participants in Changsha during post-lockdown period, consisting of the average number of contacts per day recorded by the survey participant, stratified by the age group of the contact.

|                    |       | Age of contact |      |       |       |       |       |       |       |       |       |       |       |       |       |       |      |
|--------------------|-------|----------------|------|-------|-------|-------|-------|-------|-------|-------|-------|-------|-------|-------|-------|-------|------|
|                    |       | 0-4            | 5-9  | 10-14 | 15-19 | 20-24 | 25-29 | 30-34 | 35-39 | 40-44 | 45-49 | 50-54 | 55-59 | 60-64 | 65-69 | 70-74 | 75+  |
| Age of participant | 0-4   | 0.08           | 0.03 | 0.00  | 0.00  | 0.04  | 0.60  | 0.92  | 0.15  | 0.21  | 0.09  | 0.08  | 0.14  | 0.18  | 0.04  | 0.07  | 0.00 |
|                    | 5-9   | 0.04           | 0.04 | 0.05  | 0.01  | 0.05  | 0.08  | 0.72  | 0.67  | 0.34  | 0.05  | 0.02  | 0.16  | 0.09  | 0.12  | 0.06  | 0.00 |
|                    | 10-14 | 0.04           | 0.03 | 0.09  | 0.00  | 0.00  | 0.03  | 0.14  | 0.48  | 0.87  | 0.30  | 0.10  | 0.08  | 0.10  | 0.03  | 0.00  | 0.00 |
|                    | 15-19 | 0.00           | 0.00 | 0.05  | 0.06  | 0.06  | 0.04  | 0.07  | 0.16  | 0.52  | 0.57  | 0.18  | 0.05  | 0.03  | 0.02  | 0.00  | 0.01 |
|                    | 20-24 | 0.06           | 0.03 | 0.05  | 0.15  | 0.10  | 0.10  | 0.07  | 0.03  | 0.36  | 0.70  | 0.10  | 0.06  | 0.05  | 0.05  | 0.00  | 0.04 |
|                    | 25-29 | 0.17           | 0.11 | 0.01  | 0.01  | 0.11  | 0.38  | 0.41  | 0.21  | 0.22  | 0.20  | 0.34  | 0.19  | 0.04  | 0.02  | 0.00  | 0.03 |
|                    | 30-34 | 0.24           | 0.43 | 0.04  | 0.02  | 0.03  | 0.11  | 0.47  | 0.30  | 0.06  | 0.01  | 0.06  | 0.09  | 0.10  | 0.03  | 0.00  | 0.00 |
|                    | 35-39 | 0.23           | 0.33 | 0.12  | 0.04  | 0.18  | 0.18  | 0.51  | 0.56  | 1.46  | 1.20  | 0.01  | 0.05  | 0.17  | 0.20  | 0.05  | 0.00 |
|                    | 40-44 | 0.09           | 0.17 | 0.39  | 0.20  | 0.04  | 0.03  | 0.18  | 0.21  | 0.57  | 0.30  | 0.03  | 0.02  | 0.12  | 0.09  | 0.09  | 0.04 |
|                    | 45-49 | 0.02           | 0.05 | 0.15  | 0.12  | 0.28  | 0.09  | 0.02  | 0.10  | 0.33  | 0.43  | 0.09  | 0.06  | 0.05  | 0.19  | 0.05  | 0.00 |
|                    | 50-54 | 0.05           | 0.06 | 0.07  | 0.13  | 0.18  | 0.17  | 0.21  | 0.13  | 0.11  | 0.28  | 0.50  | 0.17  | 0.01  | 0.00  | 0.09  | 0.08 |
|                    | 55-59 | 0.05           | 0.00 | 0.05  | 0.05  | 0.11  | 0.16  | 0.35  | 0.30  | 0.15  | 0.14  | 0.17  | 0.55  | 0.14  | 0.04  | 0.05  | 0.09 |
|                    | 60-64 | 0.02           | 0.06 | 0.04  | 0.00  | 0.02  | 0.11  | 0.16  | 0.12  | 0.05  | 0.03  | 0.03  | 0.29  | 0.36  | 0.18  | 0.00  | 0.05 |
|                    | 65-69 | 0.00           | 0.00 | 0.04  | 0.04  | 0.00  | 0.00  | 0.10  | 0.16  | 0.19  | 0.03  | 0.00  | 0.00  | 0.30  | 0.34  | 0.15  | 0.00 |
| 70-74              | 0.02  | 0.07           | 0.08 | 0.03  | 0.08  | 0.10  | 0.21  | 0.14  | 0.13  | 0.29  | 0.06  | 0.14  | 0.03  | 0.30  | 0.24  | 0.04  |      |
| 75+                | 0.06  | 0.02           | 0.00 | 0.11  | 0.06  | 0.22  | 0.12  | 0.06  | 0.11  | 0.35  | 0.56  | 0.42  | 0.10  | 0.03  | 0.22  | 0.04  |      |

## 4. Contacts and mobility

For comparison with our survey data, we estimated population mobility in Wuhan, Shanghai, Shenzhen, and Changsha for the same period as the contact surveys. We leveraged aggregated and de-identified mobility data from Baidu users, the largest Chinese search engine. Baidu offers location-based service (LBS), based on the global positioning system (GPS), IP address, location of signaling towers and WIFI during online searching, mapping, usage of a large variety of apps and software on mobile devices. This data has been used to visualize population migratory patterns around Chinese New Year(48) and quantify the mobility network for COVID-19 research(49). Indices of intra-city traffic volumes were obtained from <https://qianxi.baidu.com/>. The Baidu mobility index of intra-city traffic volume is a normalized ratio of a city's population with intra-city movement within 24 hours to a city's residential population, although the details of the normalization algorithm have not been made available by the company. The Baidu mobility index has been used to represent the resumption of economic activities and normal societal functions in Leung et al (50).

To be comparable with our contact surveys, we considered the period from January 6 to January 12, 2020 (Monday to Sunday) to measure mobility for the baseline period, the period from February 1 to February 10 for the outbreak period, the period from March 1 to March 20 for the post-lockdown period of Shanghai, Shenzhen, and Changsha, and the period from May 7 to May 7 (only updated to May 7) for the post-lockdown period of Wuhan (Fig. S12). We found that a very marked decrease in the Baidu mobility in the four observed Chinese cities between the pre-pandemic and lockdown periods(9), in agreement with the decrease we found in the number of contacts. However, the post-lockdown number of contacts didn't increase as much as the mobility intensity in the four study locations. The intra-city mobility has almost rebounded back to the pre-pandemic levels (73%-77%), while contacts in the same period are still very close to the ones estimated during the lockdown period.

Within-city mobility and population contact patterns reflect different phenomena. However, during the special event of a lockdown, they may be more correlated. In fact, in the contact survey we found that during the lockdown the vast majority of contacts occurred between household members and the drastic decrease in mobility highlighted by Baidu data suggests that people mainly remained in the same location (likely, the place of residence). However, the post-lockdown increase in mobility patterns may not be a good proxy of the daily number of contacts in the four study locations as people may have a good awareness of proactive social distancing (e.g., increased distance between individuals while in contact or use of a face mask) and the need to limit the in-person interactions during the post-lockdown time when the interventions are being gradually relaxed. Nevertheless, it is important to stress the limitation of the mobility data we analyzed, such as possible biases of the mobile phone user population, coverage, and Baidu user self-selection. Although a high percentage of the population owns mobile phones in China, the users are still underrepresented among specific subgroups, namely children and the elderly.

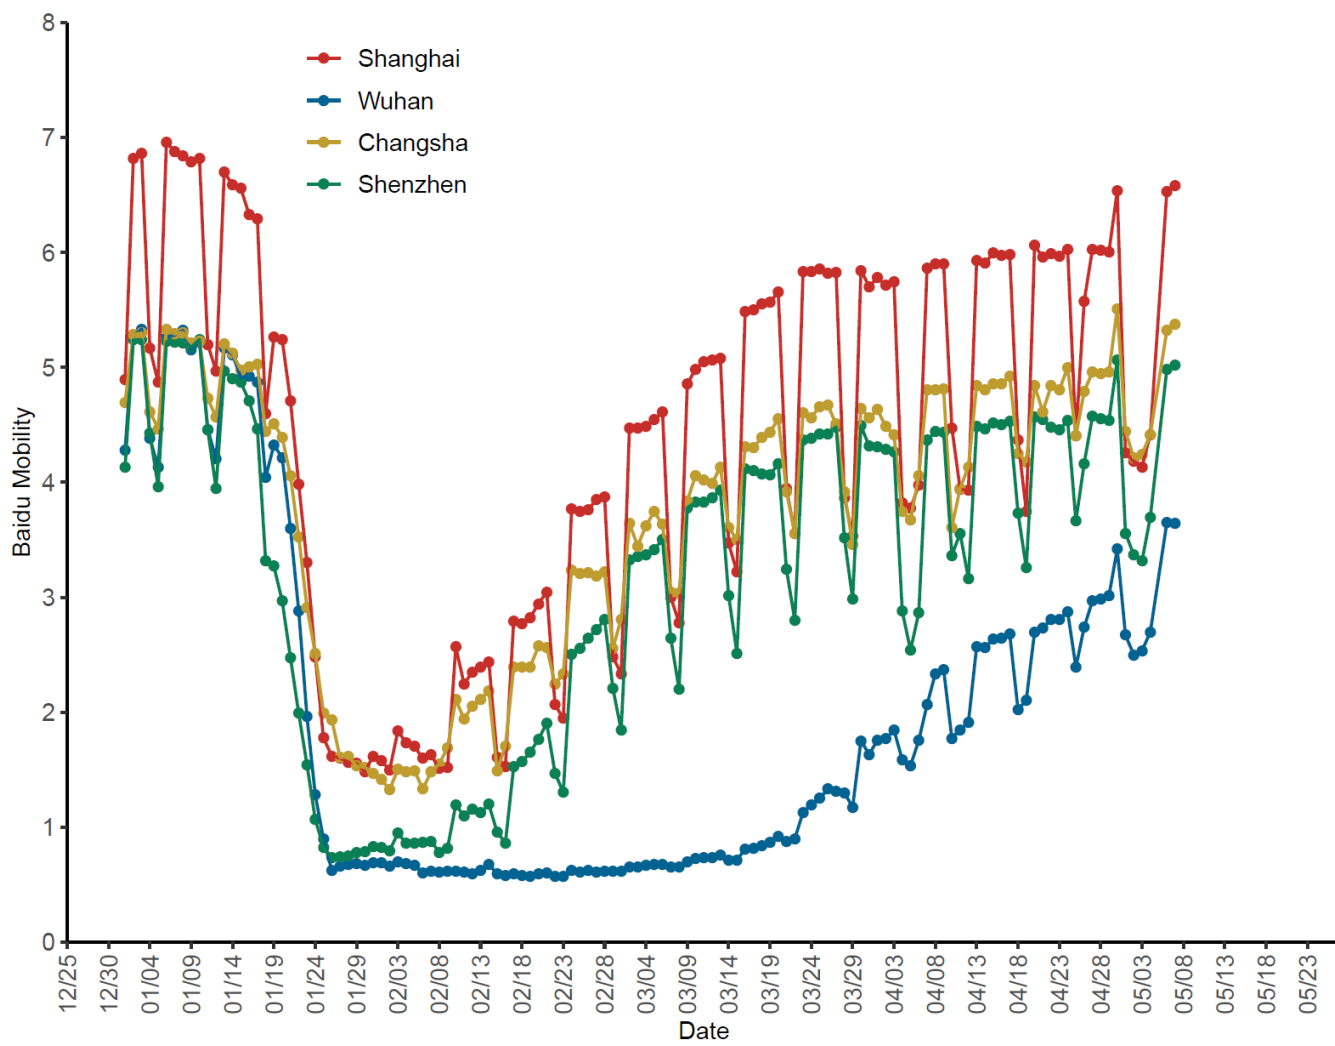

**Figure S12.** *Baidu intra-city mobility index.*

## 5. Modeling SARS-CoV-2 transmission

To simulate COVID-19 transmission dynamics using the previously described information on age-specific contact patterns and susceptibility, we used a classic age-structured SIR model (51). Briefly, susceptible individuals can acquire the infection through contacts with infectious individuals. Infectious individuals, who are infected and able to transmit the infection, can either recover or die. Each of these compartments is divided into 16 5-year age groups (0–4, 5–9, ..., 60–64, 75+ years old). Susceptible individuals are exposed to an age-specific force of infection regulated by the average number of contacts per day that individuals of a given age group have with individuals of all age groups (i.e., the contact matrix – see Tab. S23-S30). We used the following set of differential equations to simulate this process:

$$\begin{cases} \dot{S}_i = -\beta \sum_{j=1}^n M_{ij} \frac{I_j}{N_j} \sigma_i f_j S_i \\ \dot{I}_i = \beta \sum_{j=1}^n M_{ij} \frac{I_j}{N_j} \sigma_i f_j S_i - \gamma I_i \\ \dot{R}_i = \gamma I_i \end{cases}$$

where,

- $i$  represents the age group;
- $n=16$  is the total number of age classes;
- $S_i$  the number of susceptible individuals in age group  $i$ ;
- $I_i$  the number of infectious individuals in age group  $i$ ;
- $R_i$  the number of recovered individuals in age group  $i$ ;
- $N_i$  the total number of individuals in age class  $i$  (i.e.,  $N_i = S_i + I_i + R_i$ ). The number of individuals in each age group was derived from official records(52).
- $\beta$  is the transmission rate;
- $\gamma$  is the recovery rate. In a SIR model, the recovery rate is equivalent to the inverse of the duration of the generation time(53). Therefore, we set  $1/\gamma = 5.1$  days(40).
- $M_{ij}$  is the average number of contacts between individuals in age group  $i$  with individuals in age group  $j$ . The matrix of elements  $M_{ij}$  represents the contact matrix for pre-pandemic period, the COVID-19 outbreak period, and the post-lockdown period, as estimated from our survey in Wuhan, Shanghai, Shenzhen, and Changsha.
- $\sigma_i$  is the susceptibility to infection of individuals in age group  $i$ .
- $f_j$  is the infectiousness of individuals in age group  $j$ .

The basic reproduction number  $R_0$  was computed through the next-generation approach(41), following

$$R_0 = \frac{\beta}{\gamma} \rho(K)$$

where  $\rho(K)$  is the spectral radius of matrix  $K$  and the elements of  $K$  are defined as  $K_{ij} = \sigma_i f_j M_{ij}$ .

## 6. The impact of relaxing interventions on SARS-CoV-2 transmission

### 6.1 Sensitivity analysis for age-specific infectiousness

We have presented the results assuming equal infectiousness by age in the main text. In the sensitivity analysis, we assumed age-specific infectiousness, where individuals of 0-14 years have half of the infectiousness of 15+ years old after acquiring infection. Similar to the main text results were found (Fig. S13).

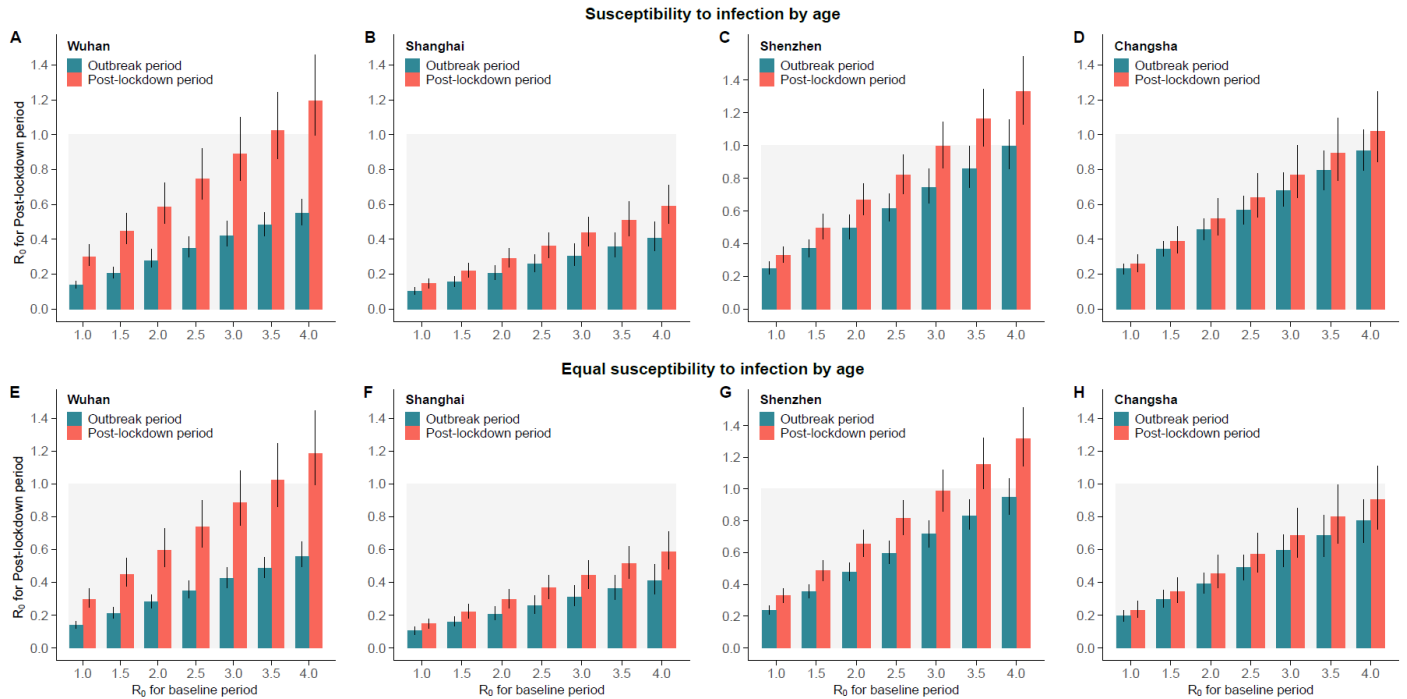

**Figure S13.** Effect of relaxing interventions on the epidemic spread (assuming age-specific infectiousness).

### 6.2 Sensitivity analysis of a possible compliance bias in contact surveys

We cannot entirely rule out that contacts reported during the post-lockdown period were minimized by survey participants due to fear of retaliation or recall bias, since social distancing interventions have not been totally lifted. To account for the potential compliance or social desirability bias of study participants, we assumed that the contacts occurring within household were properly reported, while only a fraction of non-household contacts was reported. Therefore, as a sensitivity analyses, we multiplied reported contacts outside the household by 150%, 200%, 250%, and 300%. The same procedure was used for all four locations. The resulting post-lockdown contacts matrices assuming the 300% underreporting are shown in Fig. S14 A-D. These matrices are used in a sensitivity analysis of the SARS-CoV-2 transmission model (Fig. S14 E-H).

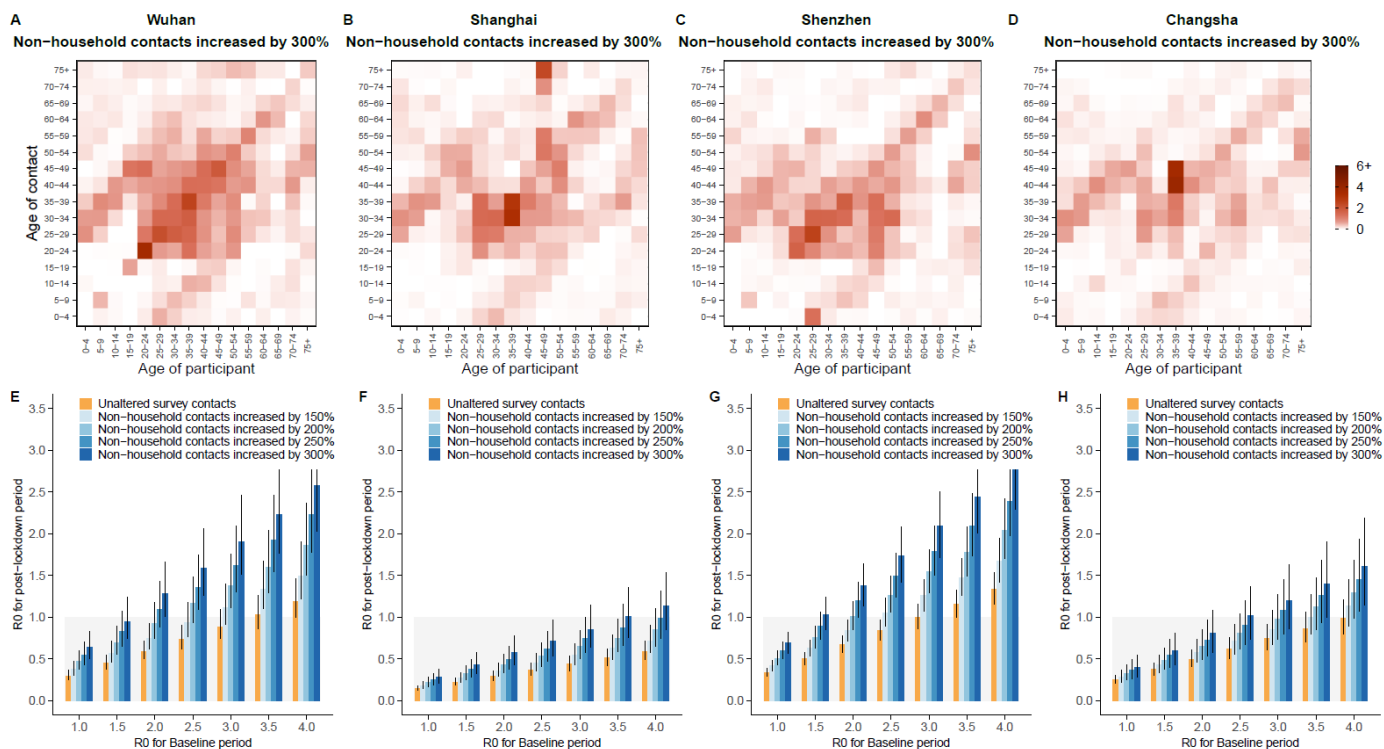

**Figure S14.** *A* Post-lockdown contact matrix for Wuhan adjusted to contrast possible compliance or social desirability bias by increasing the number of non-household contacts by 300%. Each cell of the matrix represents the mean number of total contacts that an individual in a given age group has with other individuals, stratified by age groups. The color intensity represents the number of contacts. **B-D** Same as *A*, but for Shanghai, Shenzhen, and Changsha. **E** Estimated  $R_0$  during the post-lockdown (mean and 95%CI), as a function of baseline  $R_0$ . The figure refers to Wuhan and shows the scenario assuming that all individuals have age-specific susceptibility to infection and equal infectiousness. **F-H** Same as *E*, but for Shanghai, Shenzhen, and Changsha.

## 7. Impact of a possible return to pre-pandemic school, workplace, and community contacts in Shanghai

We projected how increasing school, workplace, and community contacts when relaxing the interventions step by step can affect the spread of COVID-19 in Shanghai, based on the baseline period contact matrices by setting and the post-lockdown contact matrices by setting (Fig. S14). We, first, designed three scenarios to estimate the net effect of resuming school, workplace or community contacts. We assumed resumption of a certain fraction of the contacts in a certain setting relative to the baseline period contact matrix while keeping the contact matrices for other settings at their post-lockdown level. For schools opening (Scenario 1), three levels of reopening are considered, including (A) Schools closed; (B) Only senior high schools open; (C) All schools open. For workplace resumption (Scenario 2), the proportion of resumed workplace contacts varies between 20% and 100%. For community resumption (Scenario 3), the same levels as for the workplace are used. We finally designed scenario 4 where we considered different combinations of increase in contacts within school, workplace, and community. For scenarios 1-3, we estimated the results under different assumptions on susceptibility by age, infectiousness by age, and  $R_0$  from 1 to 4. Similarly, scenario 4 was also performed under different assumptions on susceptibility, infectiousness, and  $R_0$  of 2, 2.5, and 3.



## 7.1 Contact matrix by setting

Fig. S15 shows the contact matrices by setting for the baseline period and post-lockdown period in Shanghai. There was no estimated contact matrix at school during the post-lockdown period as schools have not reopened during the survey. Compared with the baseline contact matrix, post-lockdown contact matrix within household didn't change too much, but a drastic drop was found for contact matrix at workplace and community.

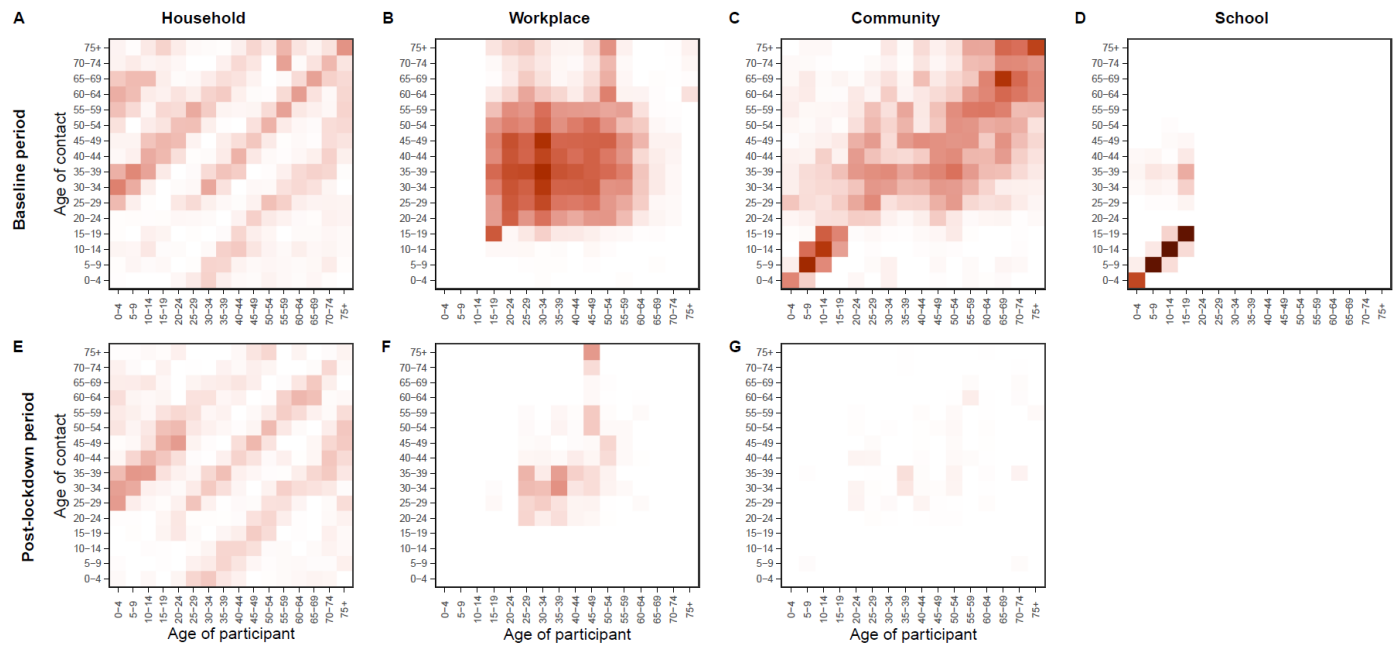

**Figure S15.** Contact matrices by contact setting during the baseline period and post-lockdown period. *A-D* stand for baseline period. *E-G* stand for post-lockdown period.

## 7.2 Scenario 1 School resumption

Fig. S16 shows the net impact of school resumption on the  $R_0$  for the post-lockdown period when only schools are resumed. For the unaltered survey contacts,  $R_0$  was always below 1. However, when baseline period  $R_0$  was originally above 2, even only senior high schools opening can make  $R_0$  above 1. The obtained results did not change much under different assumptions on susceptibility and infectiousness by age.

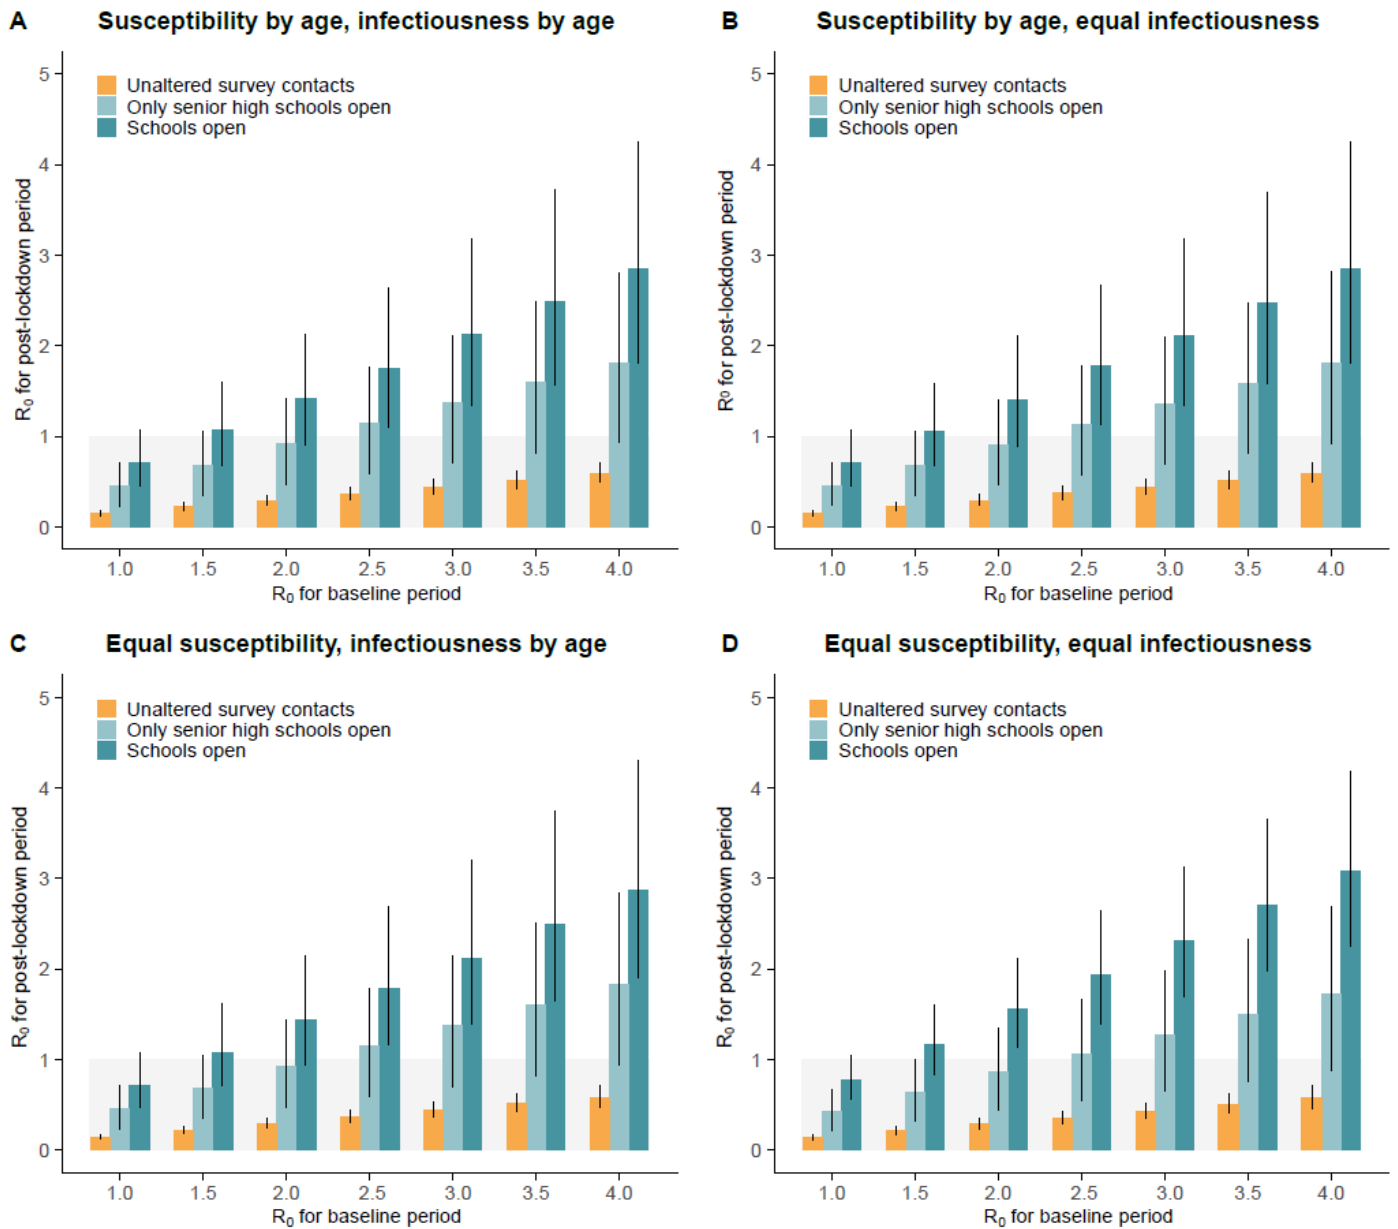

**Figure S16.** *Effect of relaxing school closure on the epidemic spread in Shanghai.*

### 7.3 Scenario 2 Workplace resumption

Fig. S17 shows the net impact of workplace resumption on the  $R_0$  for post-lockdown period when only workplaces are resumed. For unaltered survey contacts and workplace reopening up to 20%,  $R_0$  was always below 1. When we set baseline period  $R_0=2.5$ , 60% workplace reopening can bring  $R_0$  above 1. The obtained results did not change substantially under different assumptions on susceptibility and infectiousness by age.

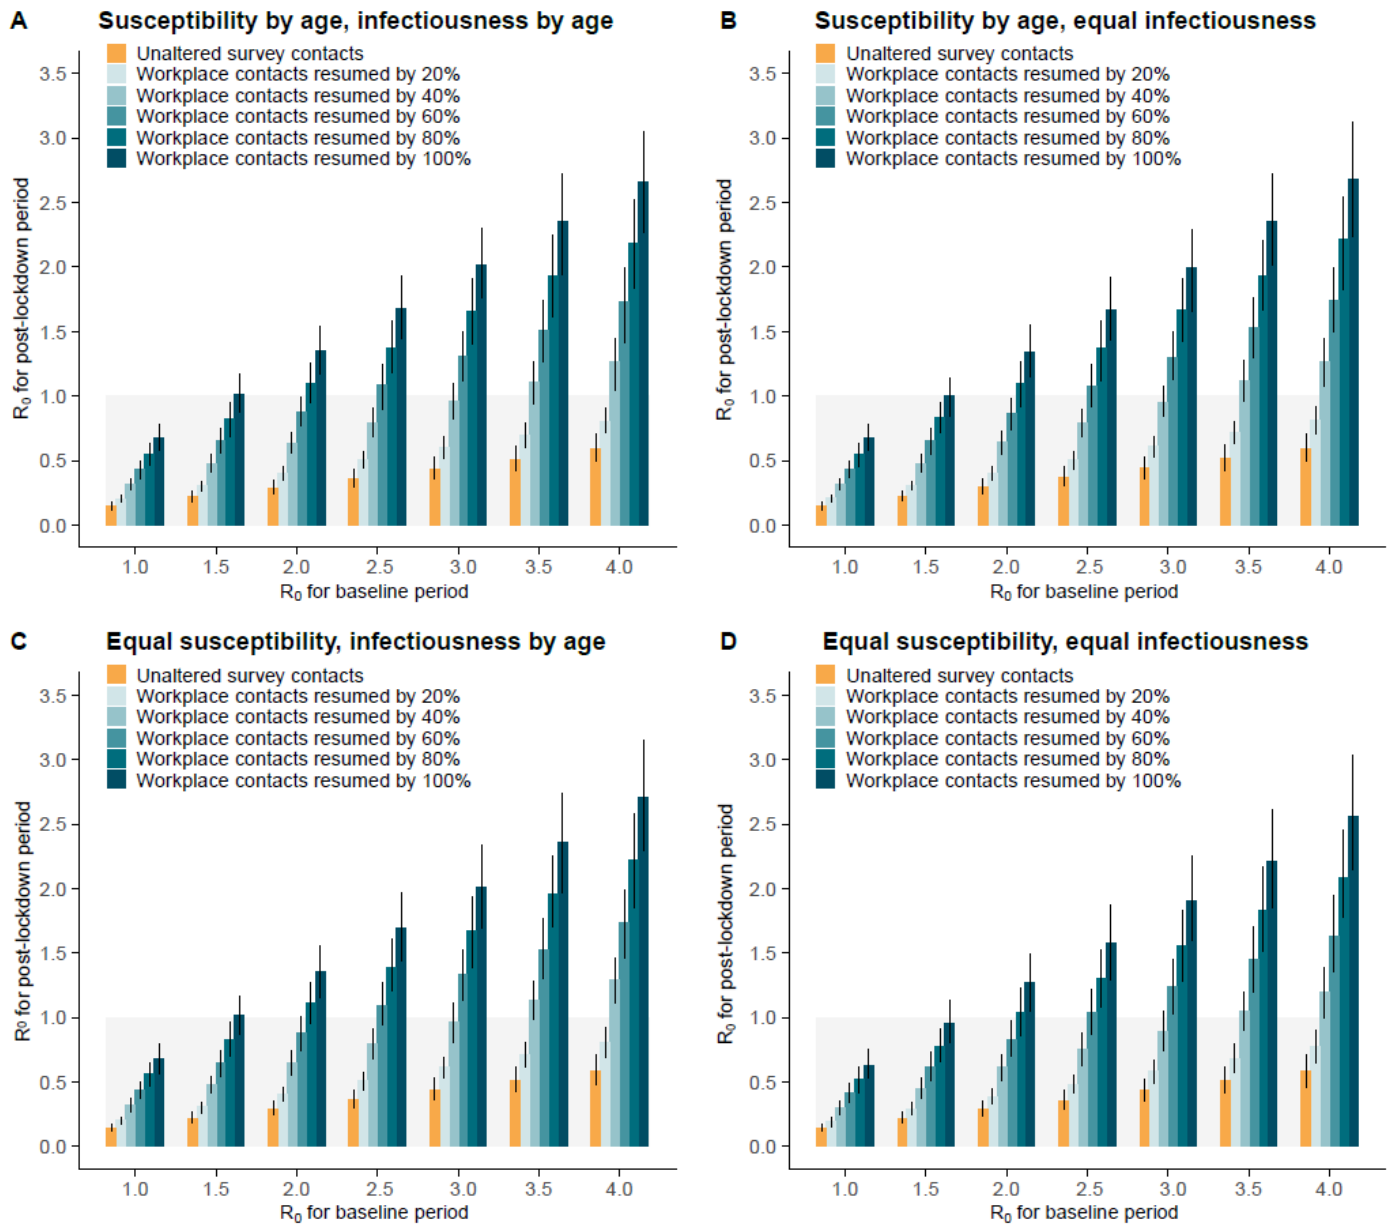

**Figure S17.** Effect of relaxing workplace closure on the epidemic spread in Shanghai.

## 7.4 Scenario 3 Community resumption

Fig. S18 shows the net impact of community reopening on the  $R_0$  for post-lockdown period when only community contacts are resumed. For unaltered survey contacts and community reopening up to 20%,  $R_0$  was always below 1. When we set baseline period  $R_0$  at 2.5 and higher, community reopening of 60% and more can make  $R_0$  above 1.

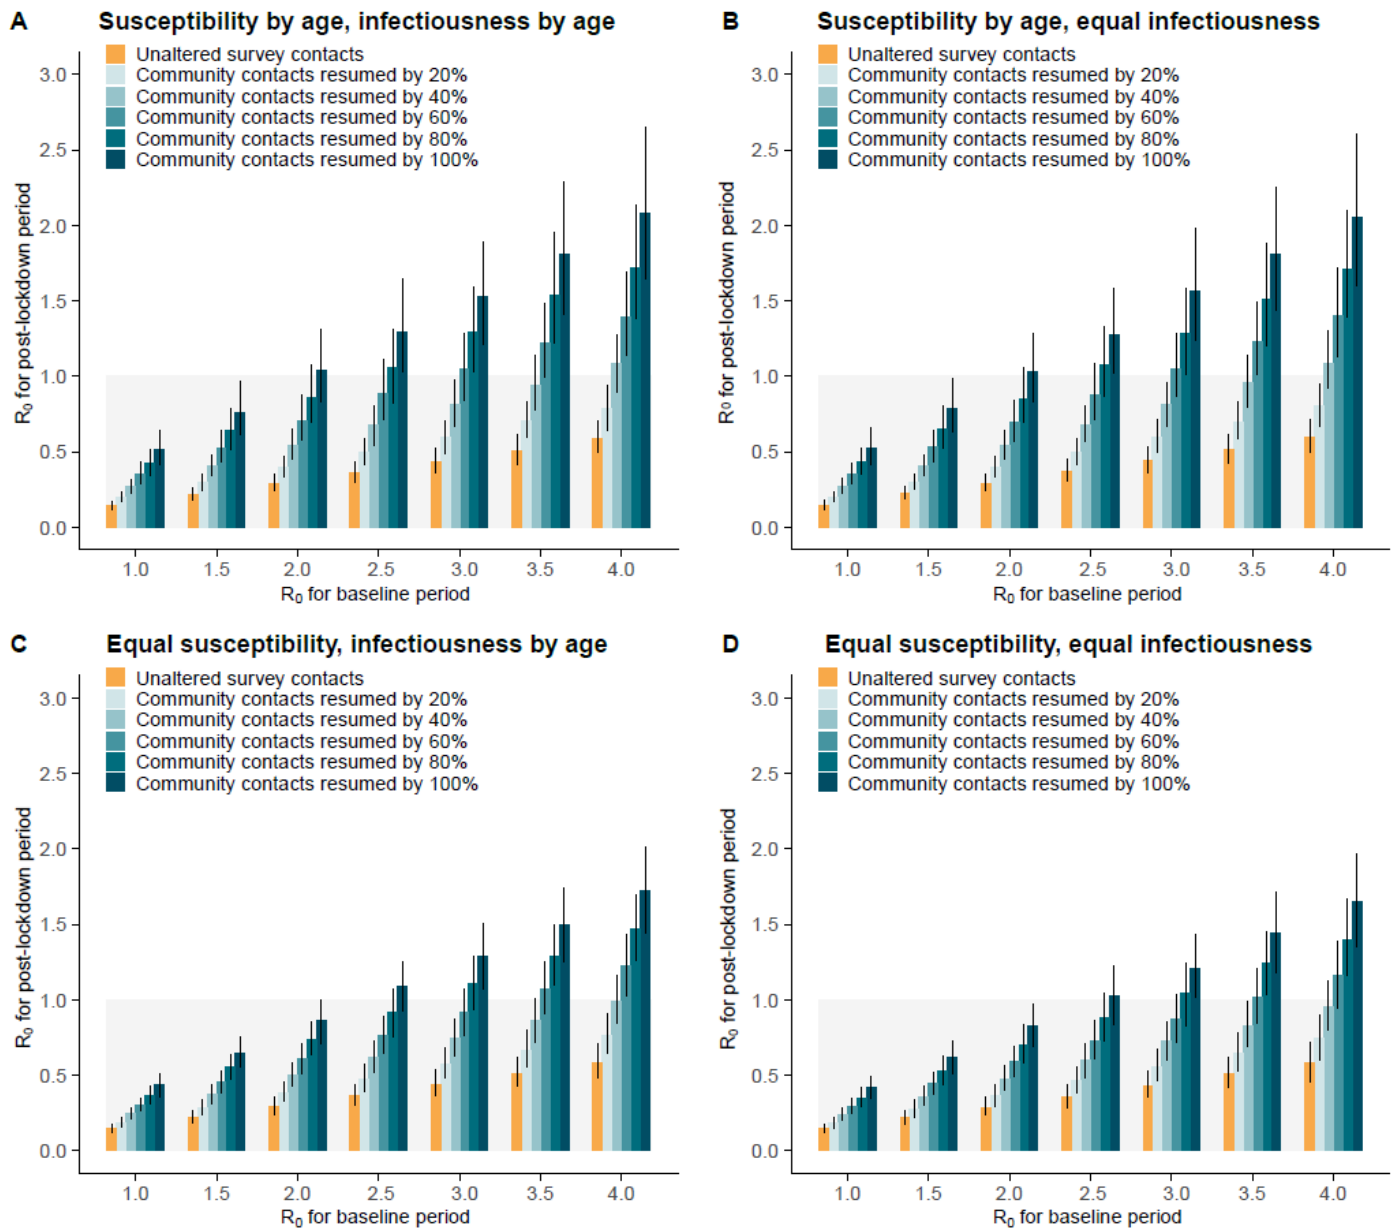

**Figure S18.** *Effect of relaxing community activity restriction on the epidemic spread in Shanghai.*

## 7.5 Scenario 4 School, workplace, and community resumption

### i. Susceptibility by age and equal infectiousness by age

When we consider  $R_0$  for baseline period equal to 2, with school closed, we could have up to 70% of workplace resumption or up to 90% of contacts in community to be resumed and still keep  $R_0$  below the epidemic threshold. With only senior high schools open, up to 40% of workplace resumption or 75% of contacts in community still keep  $R_0$  below 1. When schools are all reopened, complete social distancing in workplace and community is not sufficient to keep  $R_0$  below the epidemic threshold. As what we found in Fig. 4 in the main text, the effect of the share of school contacts resumption decrease with the increase of contacts in the other settings (Fig. S19).

While we consider  $R_0$  for baseline period equal to 3, with schools closed, we could have up to 40% of workplace contacts resumed or up to 50% of contacts in community to be resumed and still keep  $R_0$  below the epidemic threshold. When only senior high schools or all schools are reopened, complete social distancing in workplace and community is not sufficient to keep  $R_0$  below the epidemic threshold. Similarly, the effect of the share of school contacts resumption decrease with the increase of contacts in the other settings (Fig. S20).

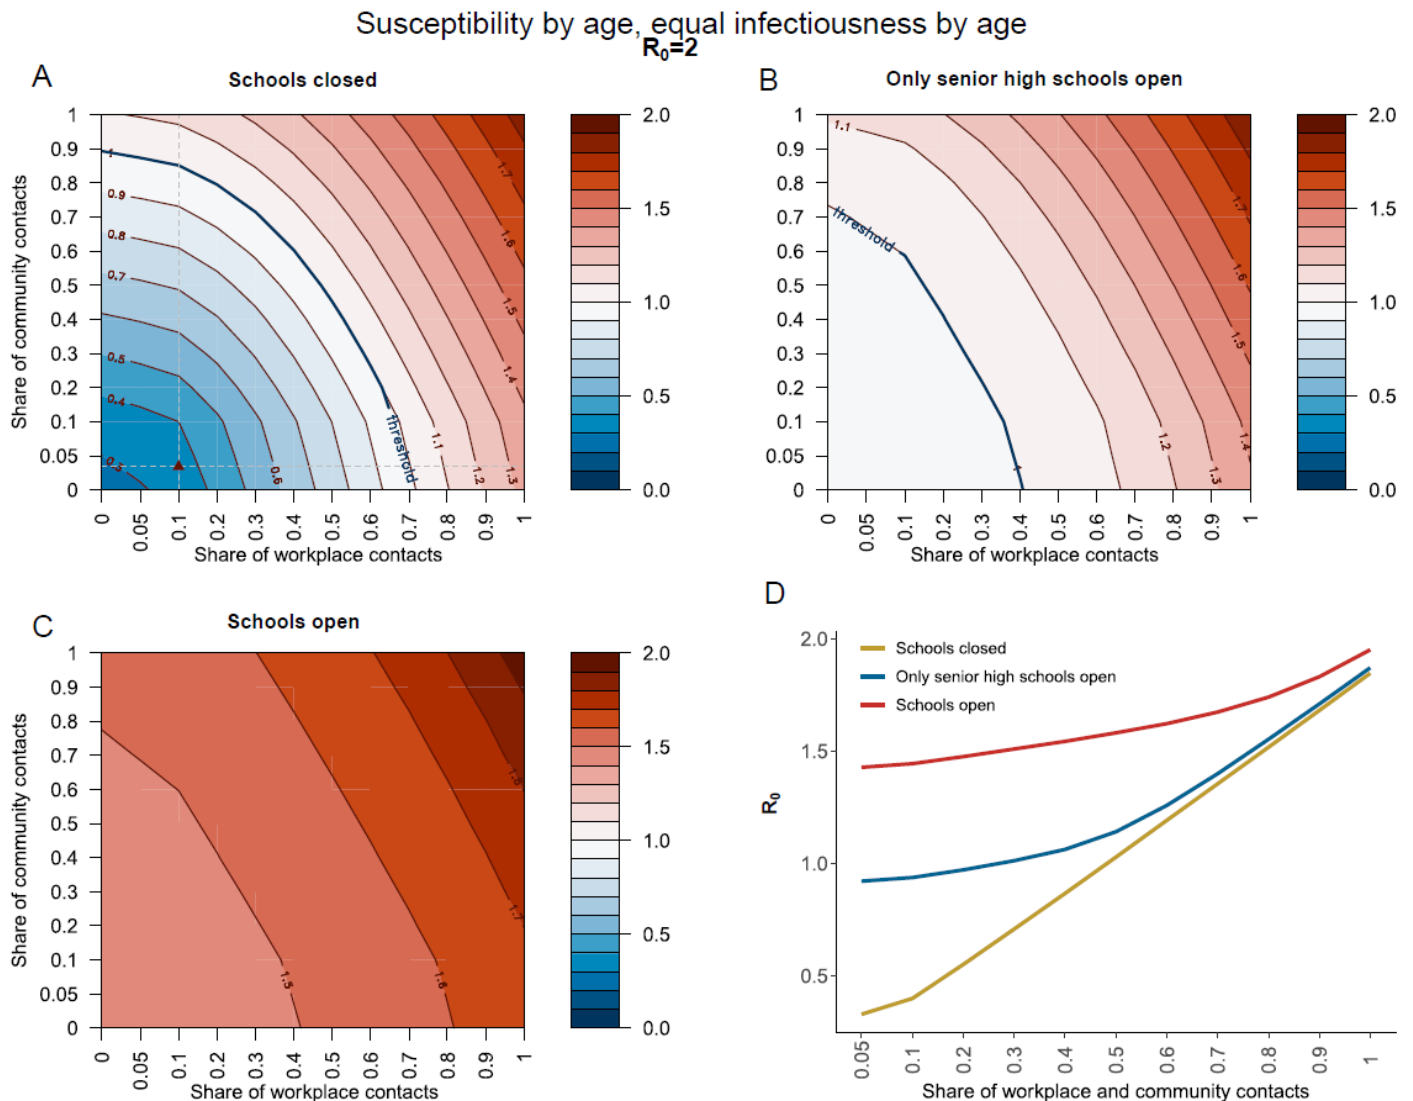

**Figure S19.** Effect of relaxing interventions on the epidemic spread assuming workplaces, community, and schools are reopened in Shanghai ( $R_0=2$ ).

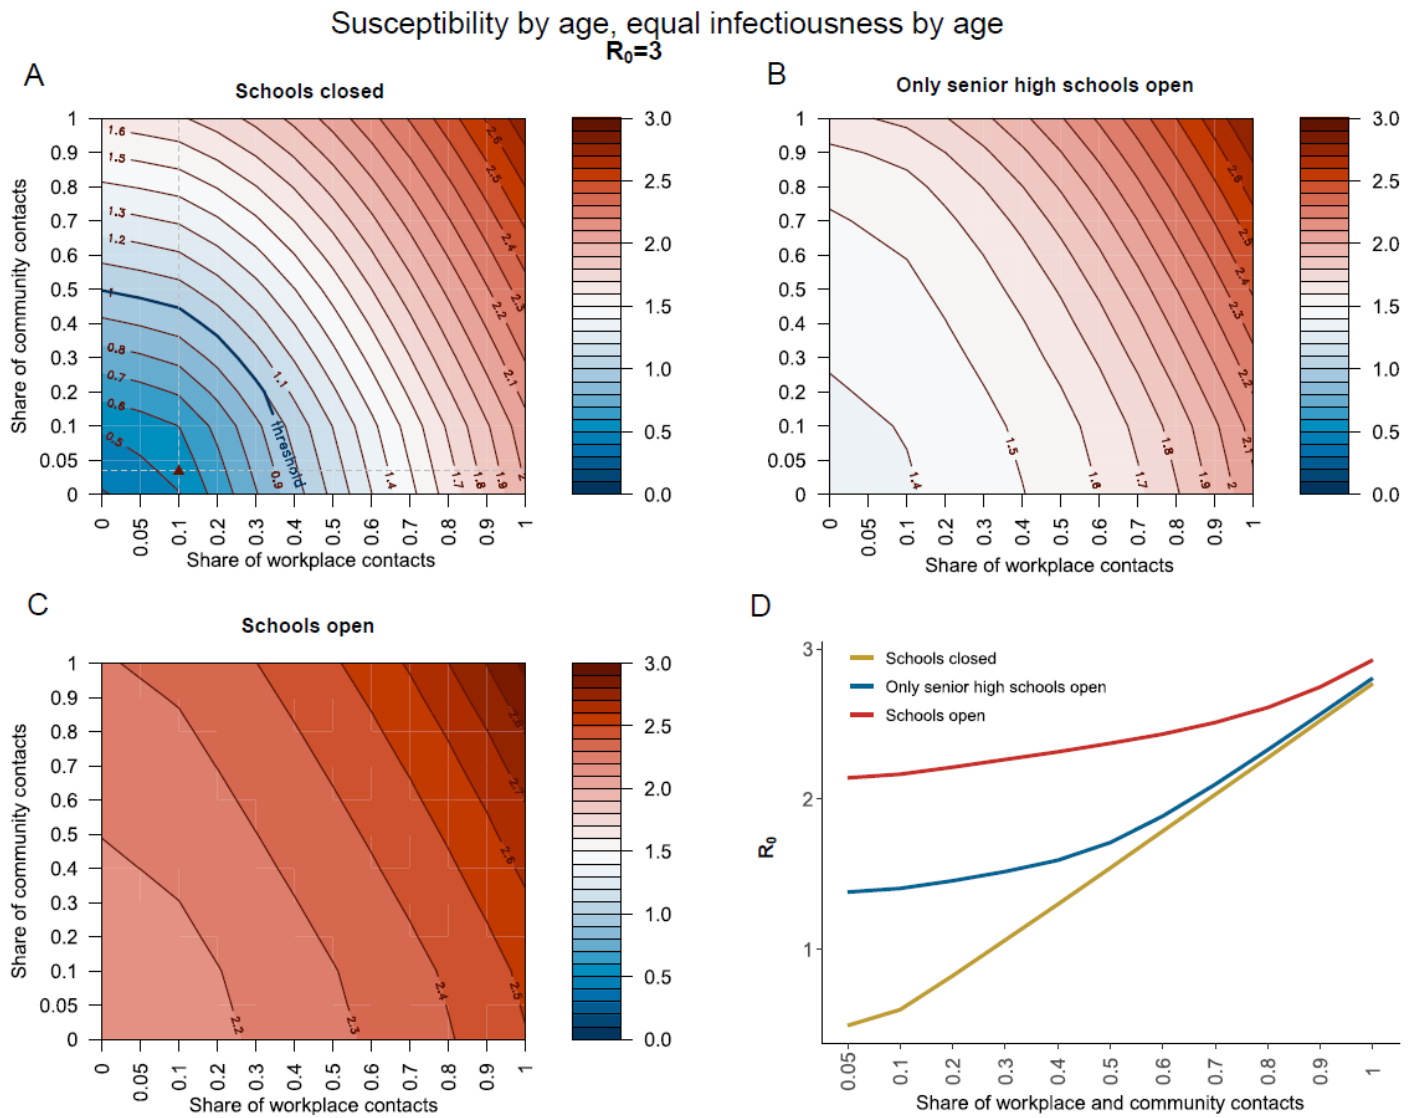

**Figure S20.** Effect of relaxing interventions on the epidemic spread assuming workplaces, community, and schools are reopened in Shanghai ( $R_0=3$ ).

ii. *Susceptibility by age and infectiousness by age*

Fig. S21-23 show the results with age-specific susceptibility and age-specific infectiousness. Results similar to the Fig. 4 and Fig. S19-S20 were obtained.

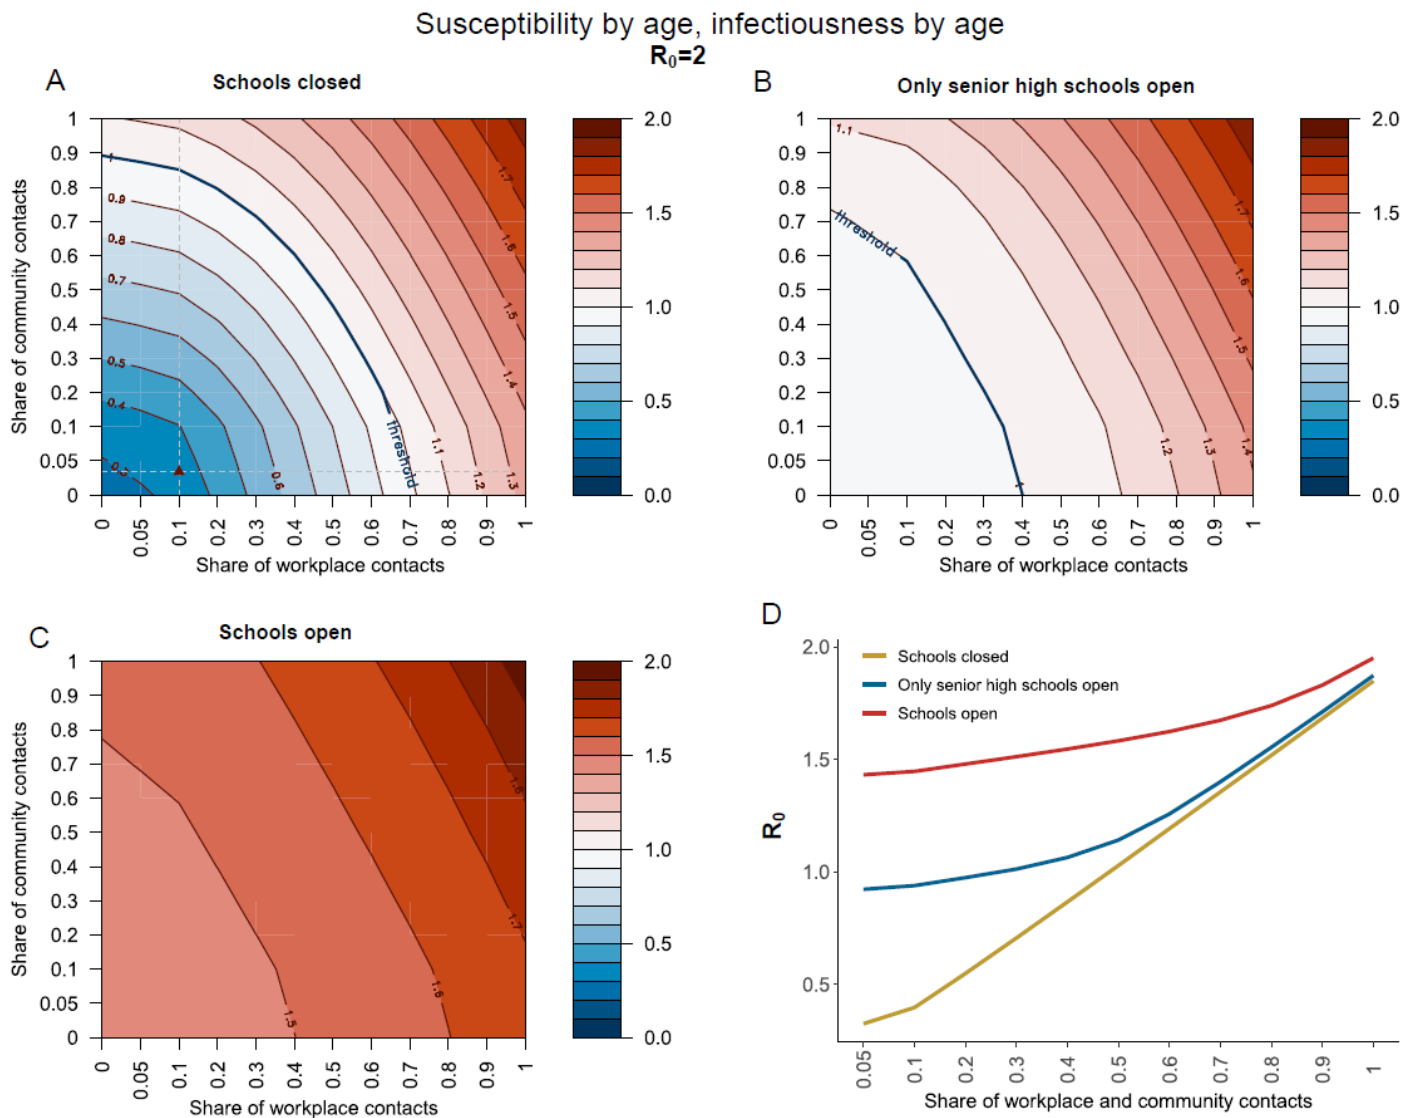

**Figure S21.** Effect of relaxing interventions on the epidemic spread assuming workplaces, community, and schools are reopened in Shanghai ( $R_0=2$ ).

Susceptibility by age, infectiousness by age  
 $R_0=2.5$

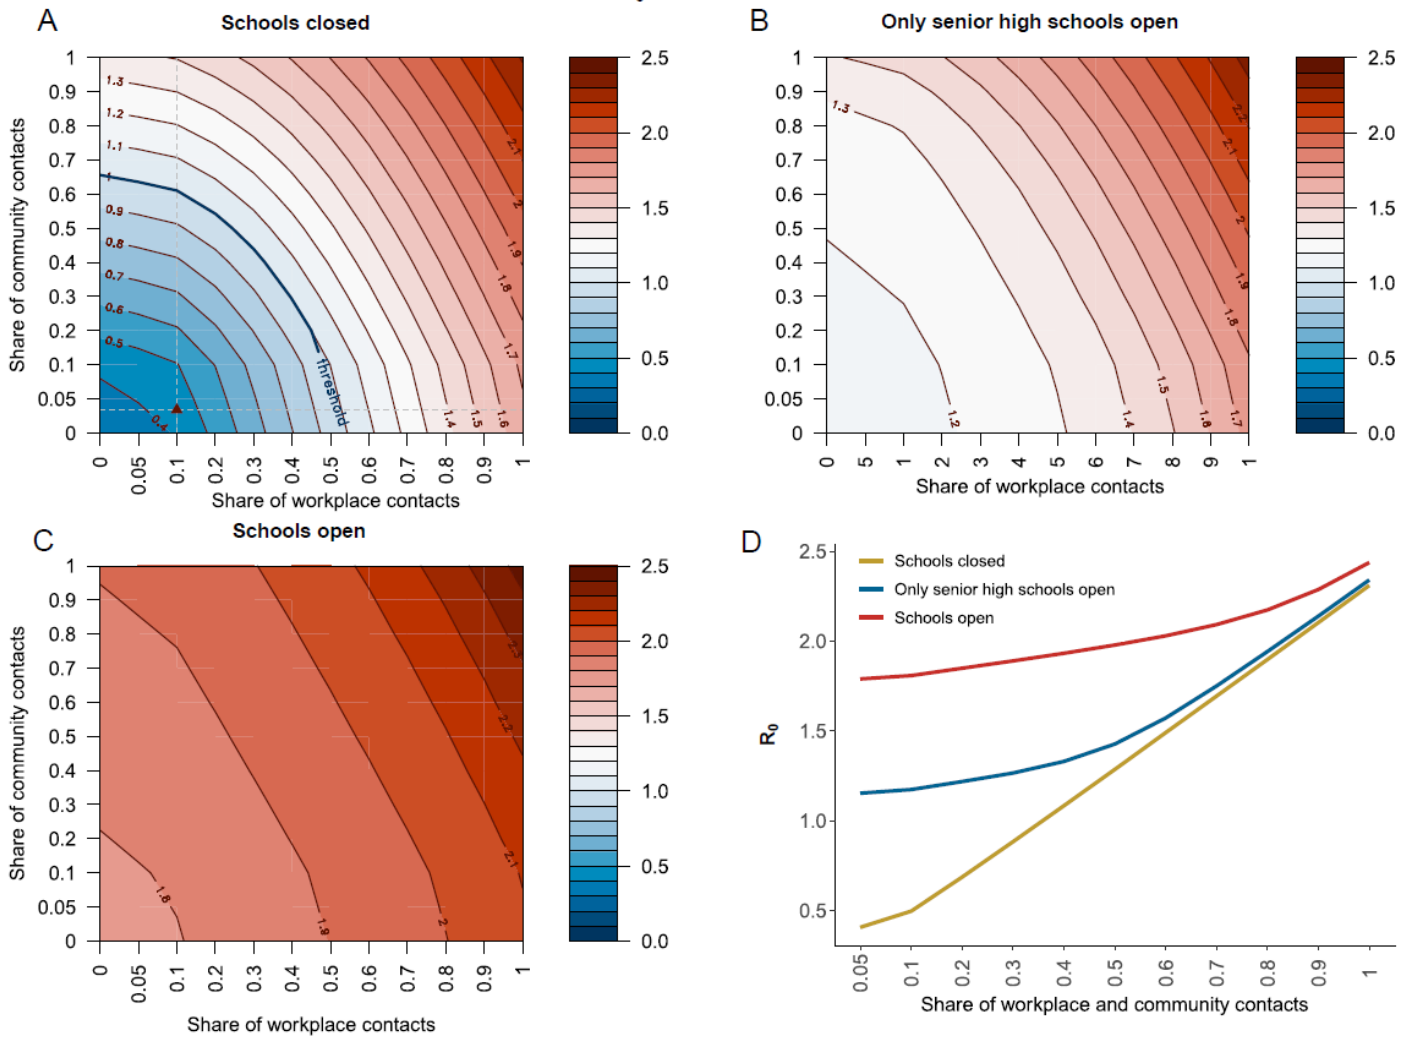

**Figure S22.** Effect of relaxing interventions on the epidemic spread assuming workplaces, community, and schools are reopened in Shanghai ( $R_0=2.5$ ).



Susceptibility by age, infectiousness by age

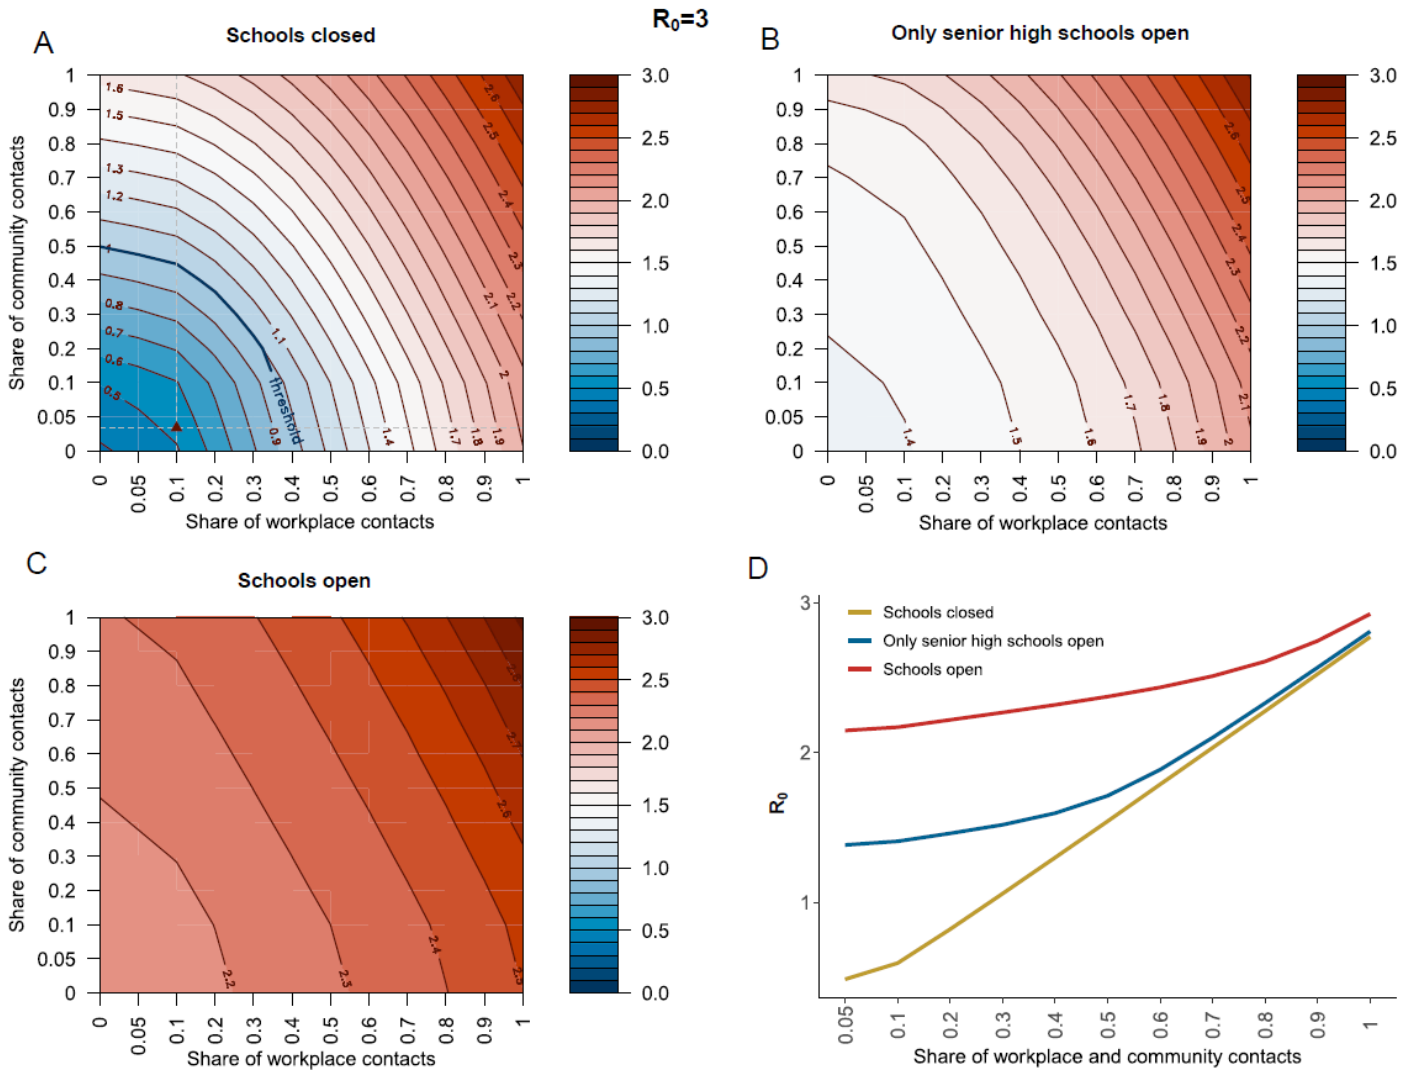

**Figure S23.** Effect of relaxing interventions on the epidemic spread assuming workplaces, community, and schools are reopened in Shanghai ( $R_0=3$ ).

*iii. Equal susceptibility by age and infectiousness by age*

Fig. S24-26 show the results with equal susceptibility by age and age-nonspecific infectiousness. When we consider  $R_0$  for baseline period equal to 2, with school closed, we could have up to 70% of workplace resumption or 100% of contacts in community to be resumed and still keep  $R_0$  below the epidemic threshold. With only senior high schools open, up to 35% of workplace resumption or 70% of contacts in community still keep  $R_0$  below 1. When all schools are reopened, no social distancing in workplace and community is sufficient to keep  $R_0$  below the epidemic threshold. As what we found in Fig. 4 in the main text, the effect of the share of school contacts resumption decrease with the increase of contacts in the other settings (Fig. S24).

When we consider  $R_0$  for baseline period equal to 2.5, with schools closed, we could have up to 55% of workplace resumption or up to 90% of contacts in community and still keep  $R_0$  below the epidemic threshold. When only senior high schools or all schools are reopened, no social distancing in workplace and community is sufficient to keep  $R_0$  below the epidemic threshold. Similarly, the effect of the share of school contacts resumption decrease with the increase of contacts in the other settings (Fig. S25).

When we consider  $R_0$  for baseline period equal to 3, with schools closed, we could have up to 40% of workplace resumption or up to 70% of contacts in community to be resumed and still keep  $R_0$  below the epidemic threshold. When only senior high schools or all schools are reopened, the  $R_0$  was always above the epidemic threshold (Fig. S26).

Equal susceptibility by age, infectiousness by age

$R_0=2$

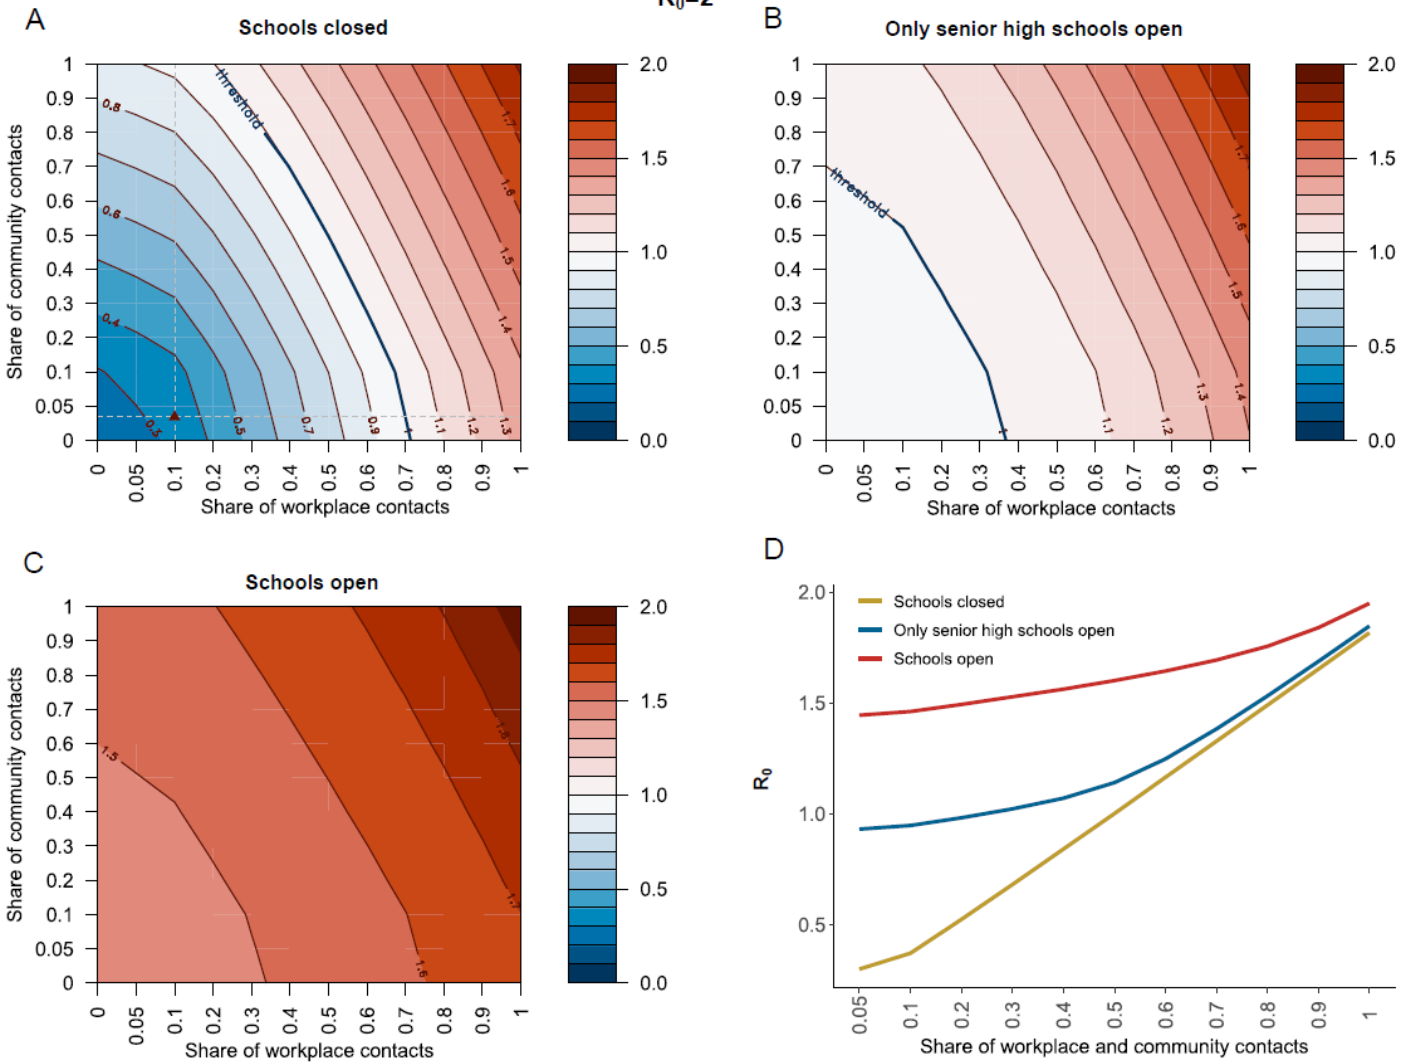

**Figure S24.** Effect of relaxing interventions on the epidemic spread assuming workplaces, community, and schools are reopened in Shanghai ( $R_0=2$ ).

Equal susceptibility by age, infectiousness by age

$R_0=2.5$

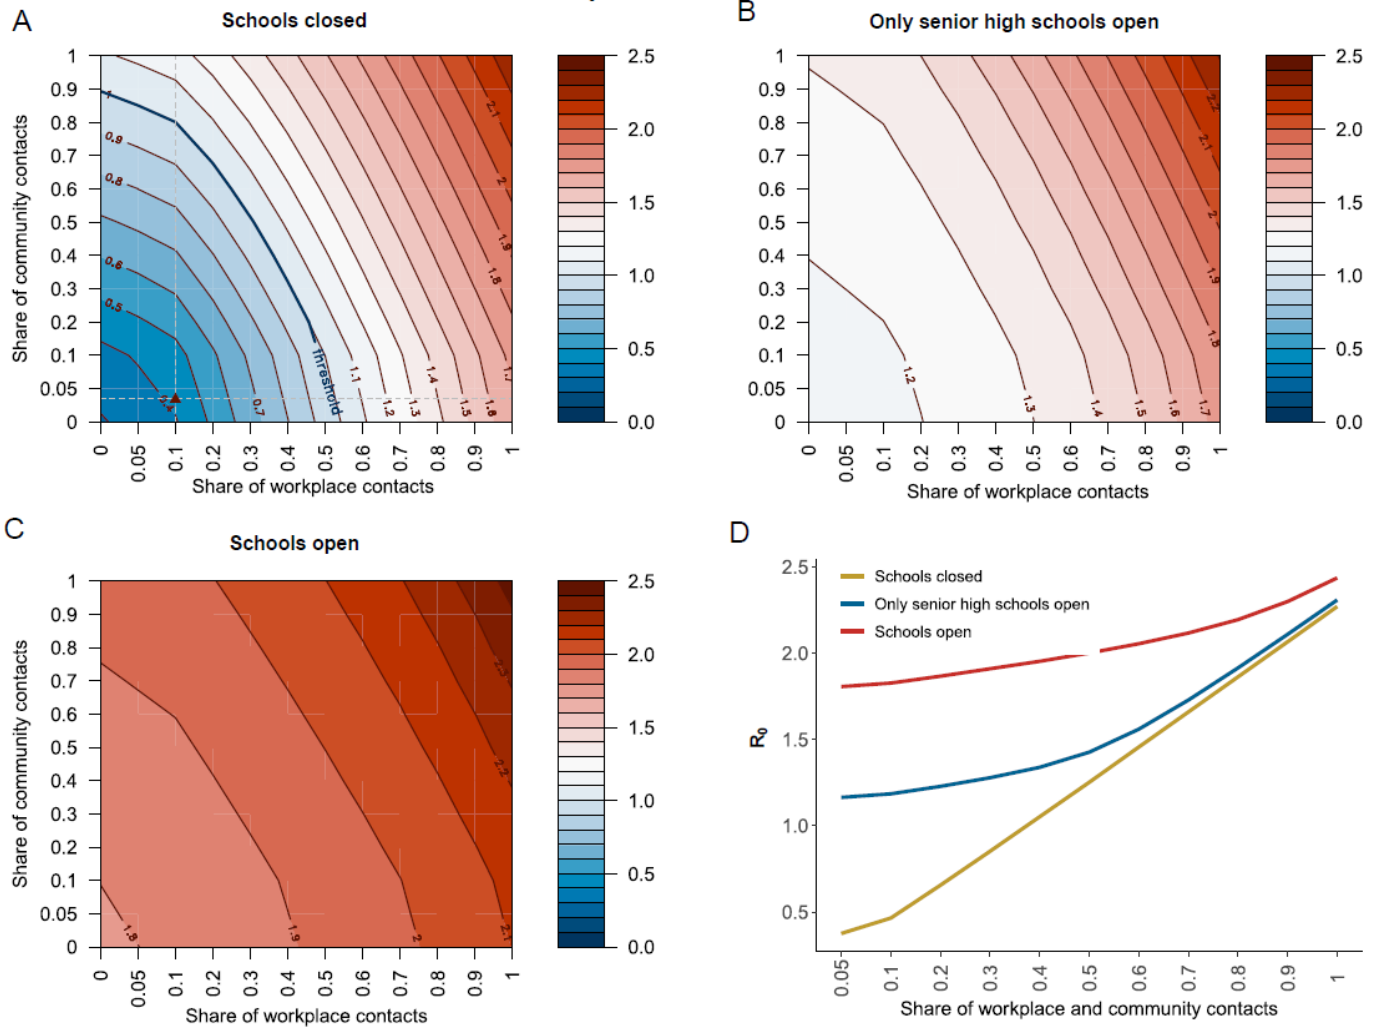

**Figure S25.** Effect of relaxing interventions on the epidemic spread assuming workplaces, community, and schools are reopened in Shanghai ( $R_0=2.5$ ).

Equal susceptibility by age, infectiousness by age

$R_0=3$

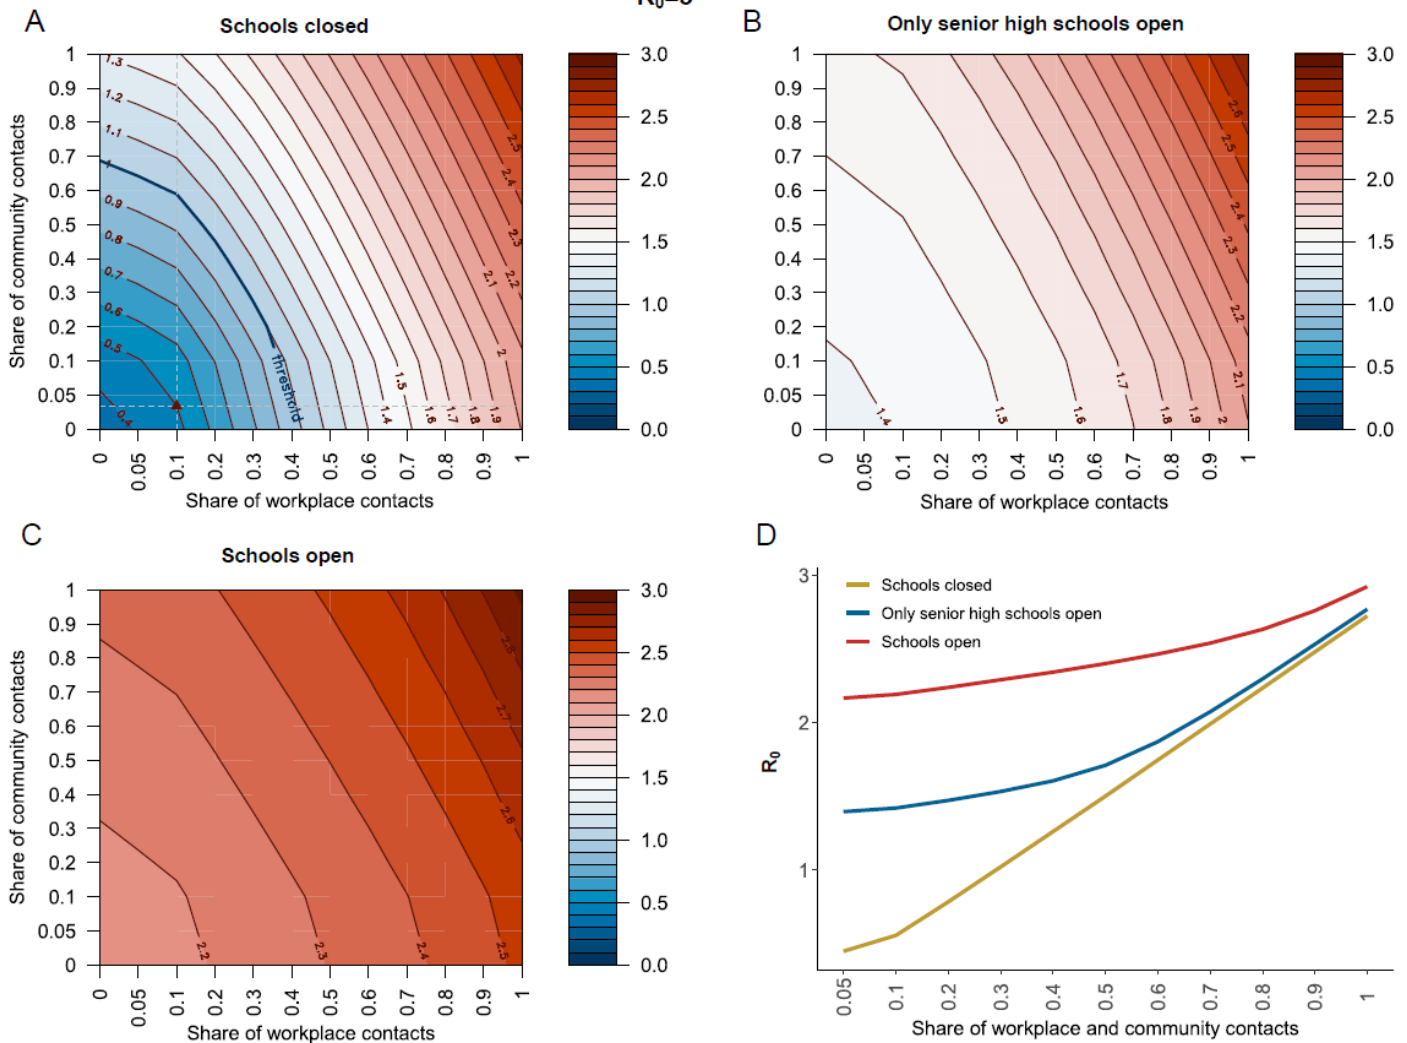

**Figure S26.** Effect of relaxing interventions on the epidemic spread assuming workplaces, community, and schools are reopened in Shanghai ( $R_0=3$ ).

*iv. Equal susceptibility by age and equal infectiousness by age*

Fig. S27-S29 show the results with equal susceptibility and equal infectiousness by age. When we set  $R_0$  for baseline period at 2, with schools closed, we could have up to 75% of workplace resumption or up to 100% of contacts in community and still keep  $R_0$  below the epidemic threshold. With only senior high schools open, up to 60% of workplace resumption or 100% of contacts in community still keep  $R_0$  below 1. When schools are all reopened, no social distancing in workplace and community is sufficient to keep  $R_0$  below the epidemic threshold. As what we found in Fig. 4 in the main text, the effect of the share of school contacts resumption decrease with the increase of contacts in the other settings (Fig. S27).

When we set  $R_0$  for baseline period at 2.5, with schools closed, we could have up to 60% of workplace resumption or up to 95% of contacts in community to be resumed and still keep  $R_0$  below the epidemic threshold. When only senior high schools or all schools are reopened, no social distancing in workplace and community is sufficient to keep  $R_0$  below the epidemic threshold. Similarly, the effect of the share of school contacts resumption decrease with the increase of contacts in the other settings (Fig. S28).

While we set  $R_0$  for baseline period at 3, with schools closed, we could have up to 45% of workplace resumption or up to 75% of contacts in community and still keep  $R_0$  below the epidemic threshold. When only senior high schools or all schools are reopened, the  $R_0$  was always above the epidemic threshold (Fig. S29).

Equal susceptibility by age, equal infectiousness by age

$R_0=2$

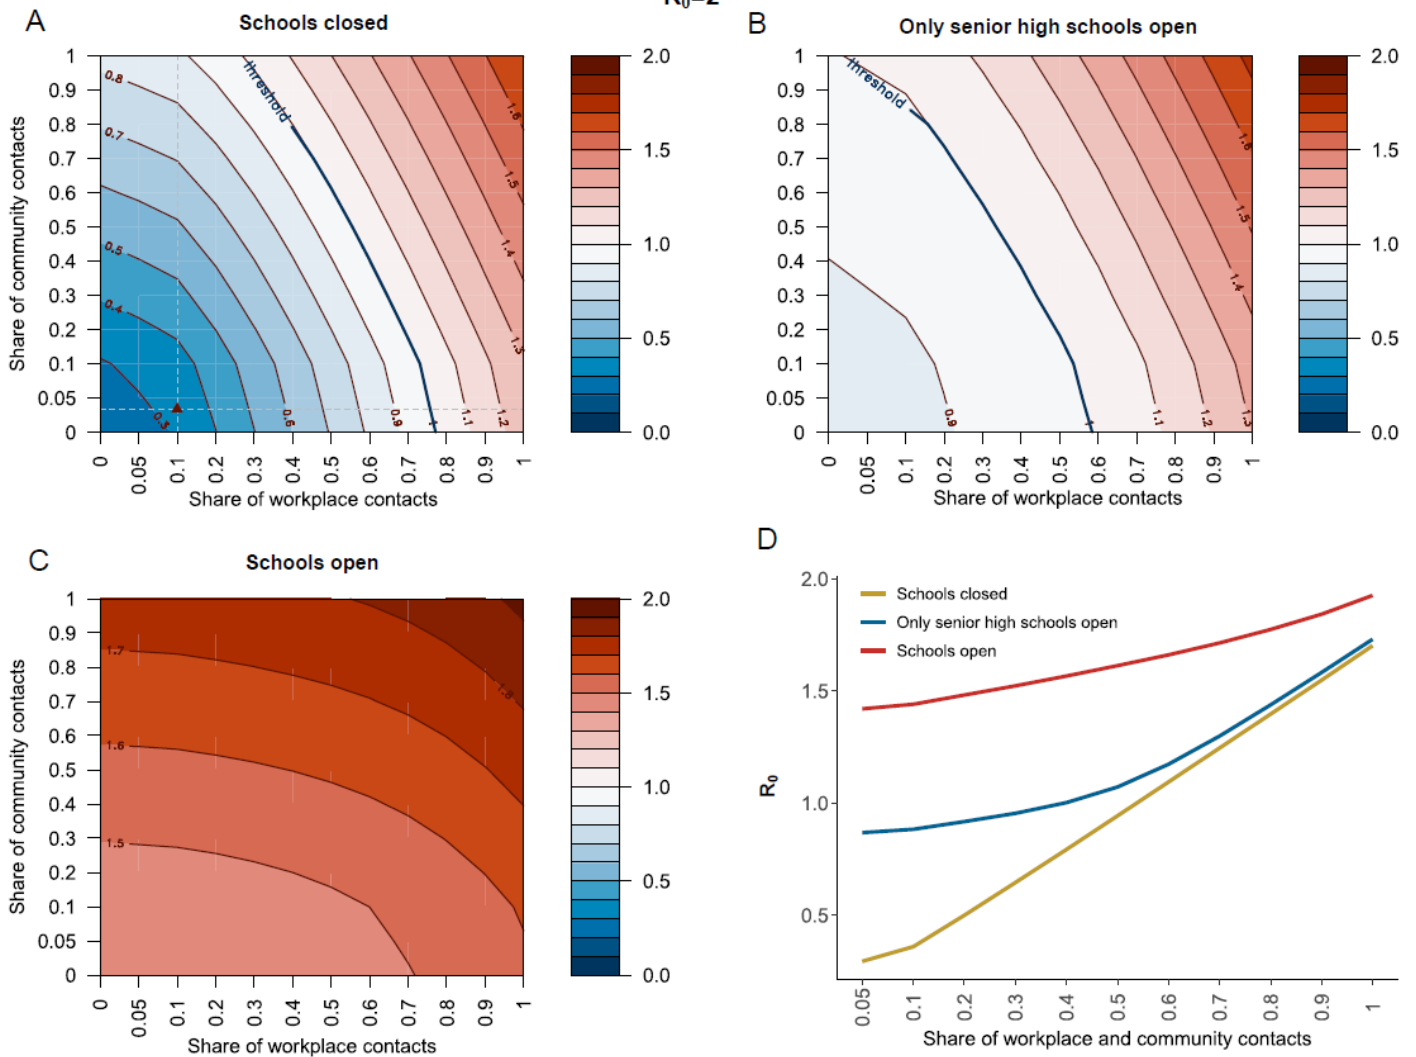

**Figure S27.** Effect of relaxing interventions on the epidemic spread assuming workplaces, community, and schools are reopened in Shanghai ( $R_0=2$ ).

Equal susceptibility by age, equal infectiousness by age

$R_0=2.5$

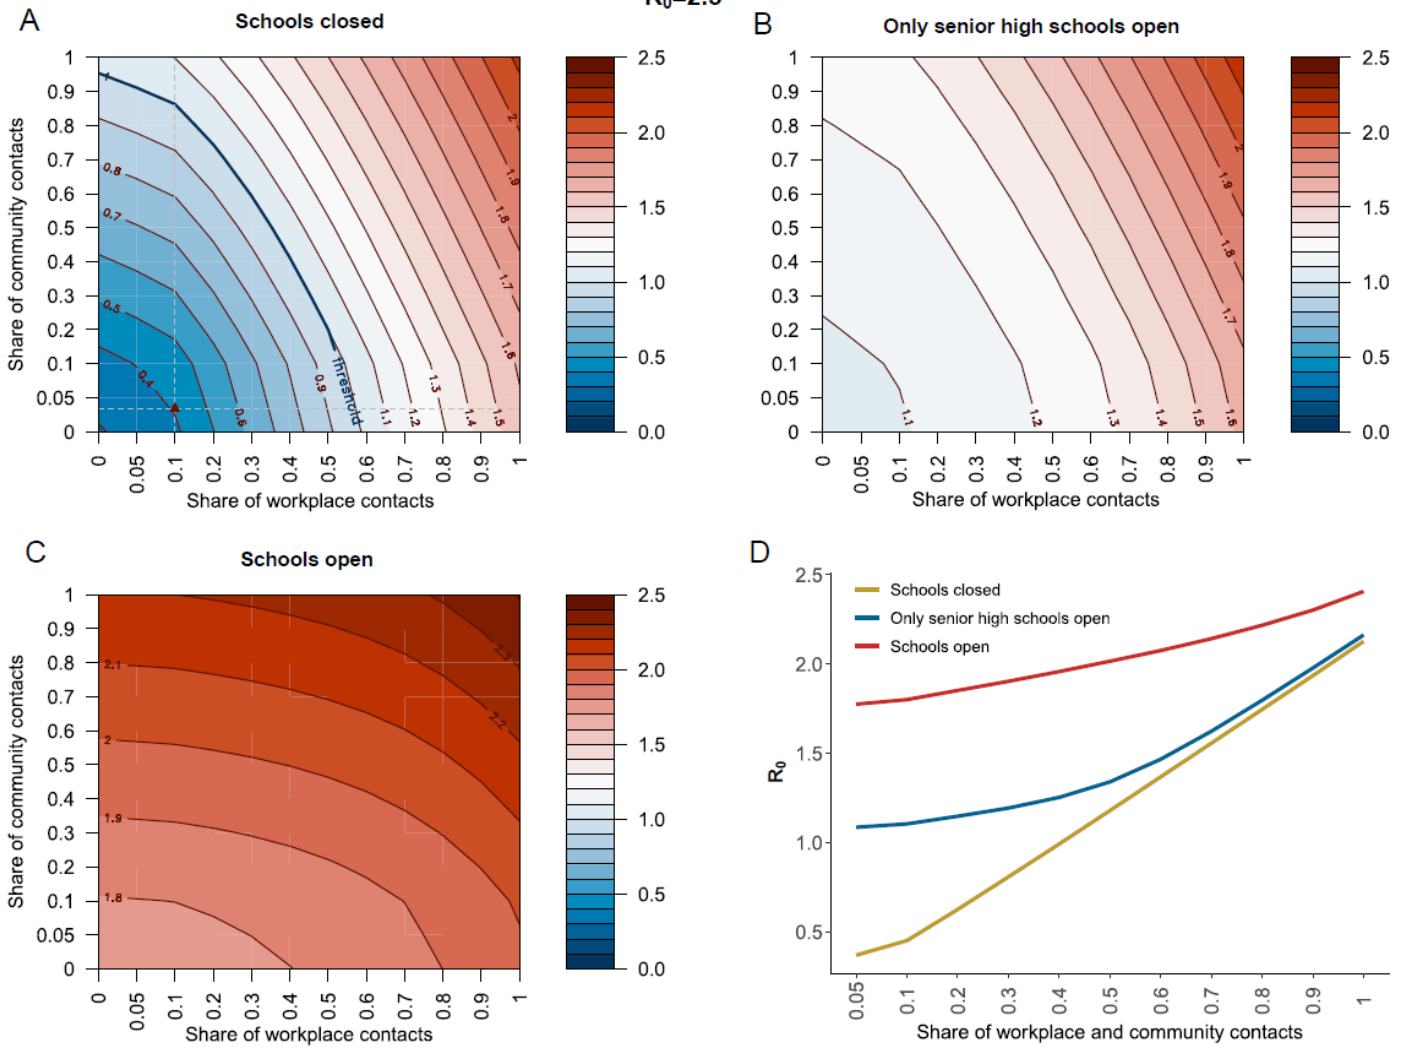

**Figure S28.** Effect of relaxing interventions on the epidemic spread assuming workplaces, community, and schools are reopened in Shanghai ( $R_0=2.5$ ).



Equal susceptibility by age, equal infectiousness by age

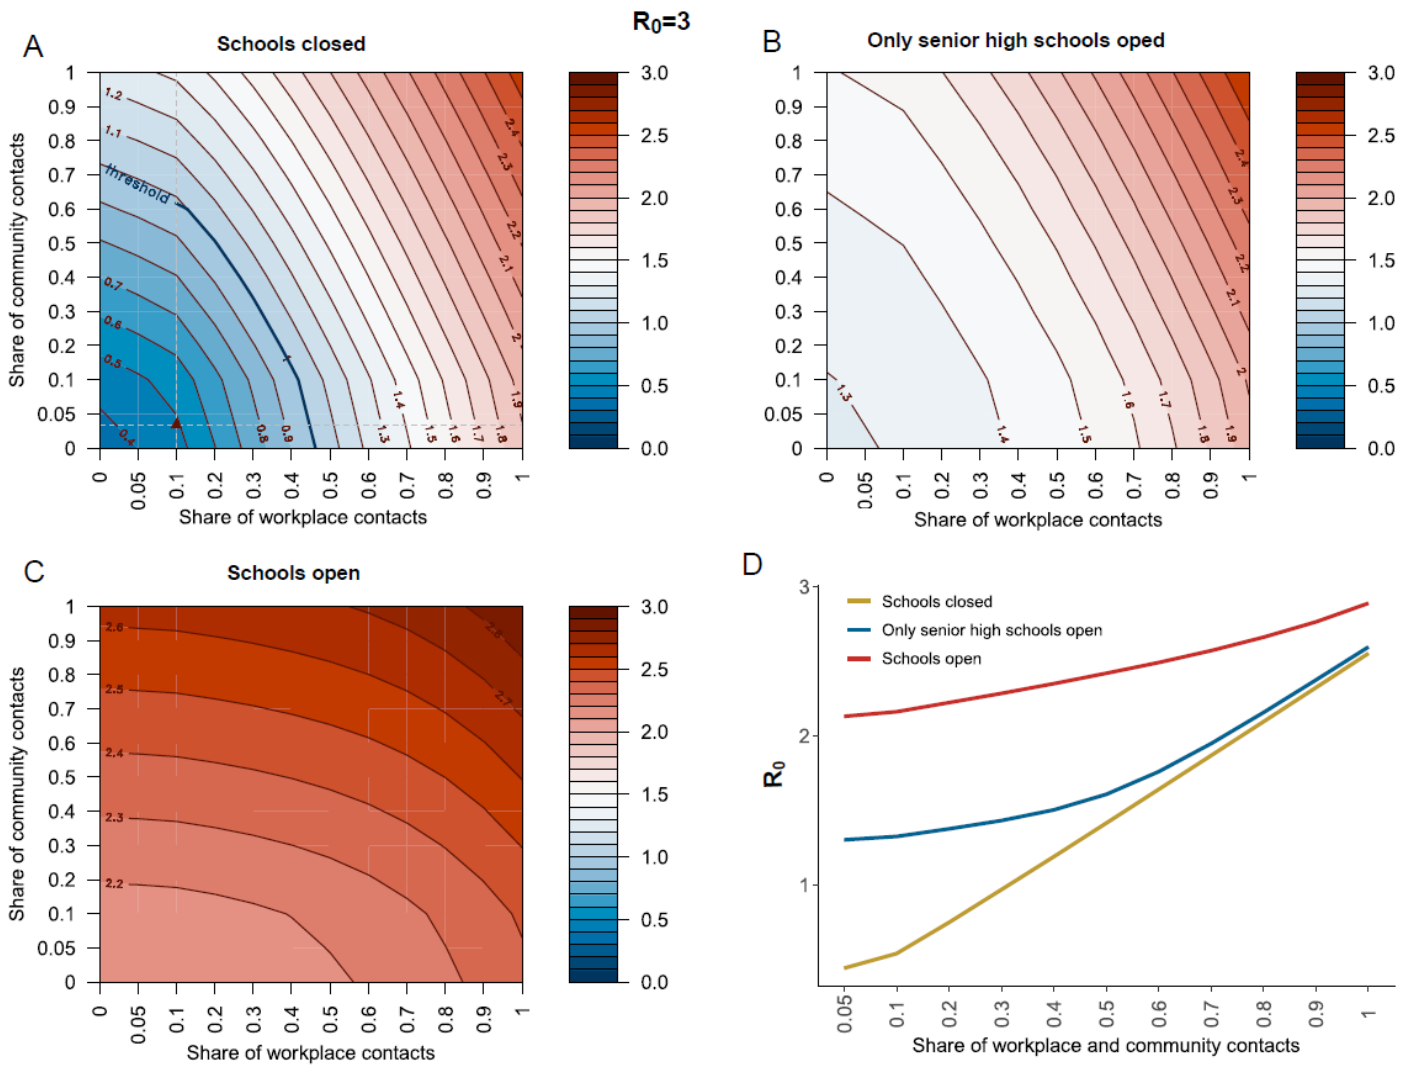

**Figure S29.** Effect of relaxing interventions on the epidemic spread assuming workplaces, community, and schools are reopened in Shanghai ( $R_0=3$ ).

## 8. Impact of a possible return to pre-pandemic school, workplace, and community contacts in Shenzhen and Changsha

The procedure similar to what we did in Figure 4 of the main text for Shanghai was performed both for Shenzhen and Changsha. We did not evaluate the impact of relaxing interventions on the SARS-CoV-2 transmission for Wuhan as we have no baseline contact matrix by setting.

### i. Shenzhen

Fig. S30 shows the setting-specific contact matrices both for baseline period and the post-lockdown period. These matrices were used to estimate the change of  $R_0$  during the post-lockdown period. Fig. S31 shows the results with age-specific susceptibility and equal infectiousness by age. When we consider  $R_0$  for baseline period equal to 2.5, with schools closed, we could have up to 45% of workplace resumption or up to 90% of contacts in community to be resumed and still keep  $R_0$  below the epidemic threshold. With schools open, up to 35% of workplace resumption or 85% of contacts in community still keep  $R_0$  below 1.

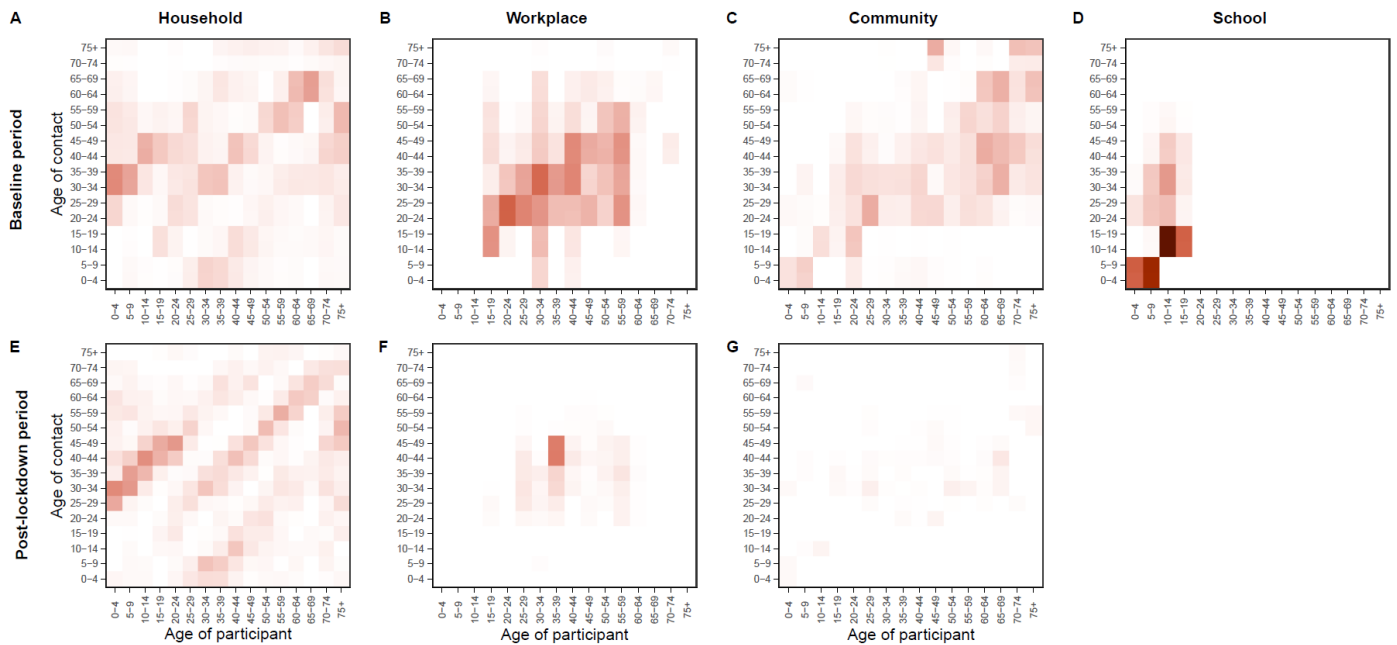

**Figure S30.** Contact matrices by contact setting during baseline period and post-lockdown period for Shenzhen.

## Susceptibility by age, equal infectiousness by age

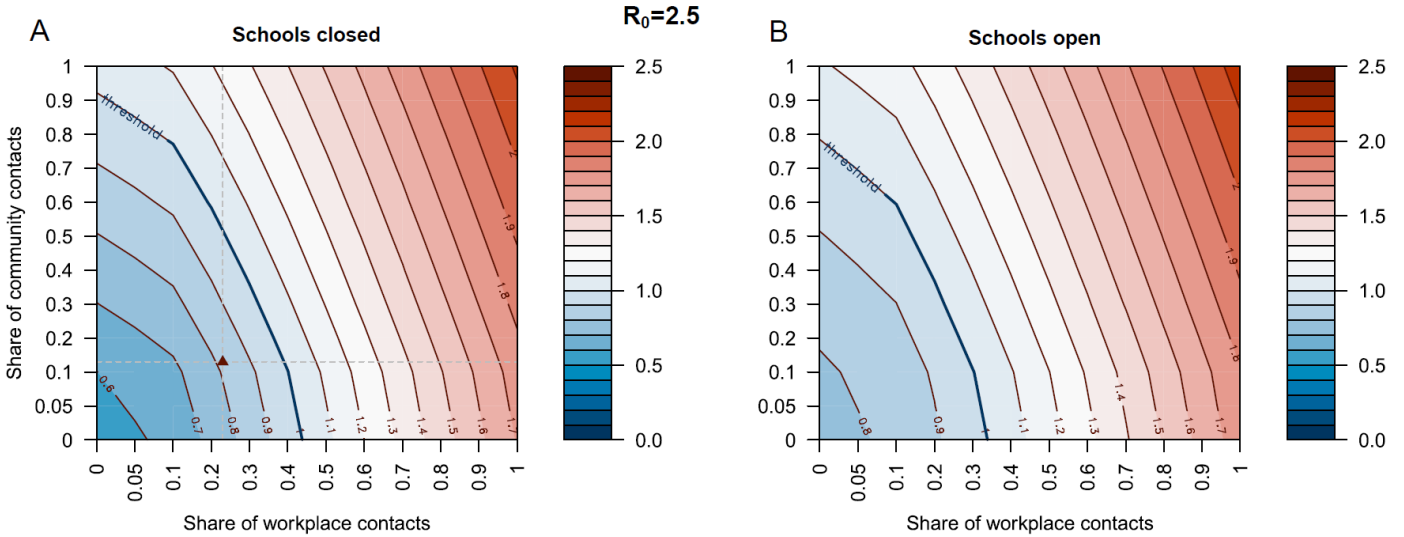

**Figure S31.** Effect of relaxing interventions on the epidemic spread assuming workplaces, community, and schools are reopened in Shenzhen ( $R_0=2.5$ ).

### ii. Changsha

Fig. S32 shows the setting-specific contact matrices both for baseline period and the post-lockdown period, which was used to estimate the change of  $R_0$  during the post-lockdown period. Fig. S33 showed the results with age-specific susceptibility and equal infectiousness by age. When we consider  $R_0$  for baseline period equal to 2.5, with schools closed, we could have up to 50% of workplace resumption or up to 90% of contacts in community to be resumed and still keep  $R_0$  below the epidemic threshold. With schools open, social distancing in workplace and community is not sufficient to keep  $R_0$  below the epidemic threshold.

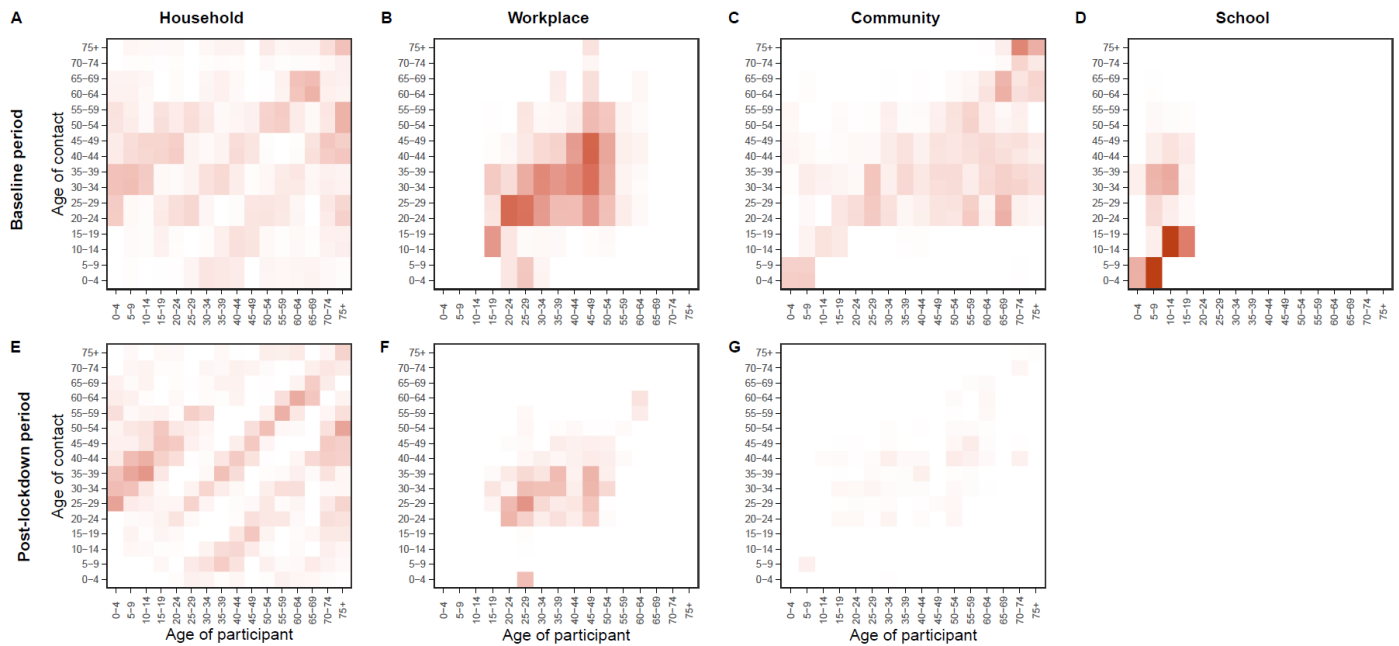

**Figure S32.** Contact matrices by contact setting during baseline period and post-lockdown period for Changsha.

### Susceptibility by age, equal infectiousness by age

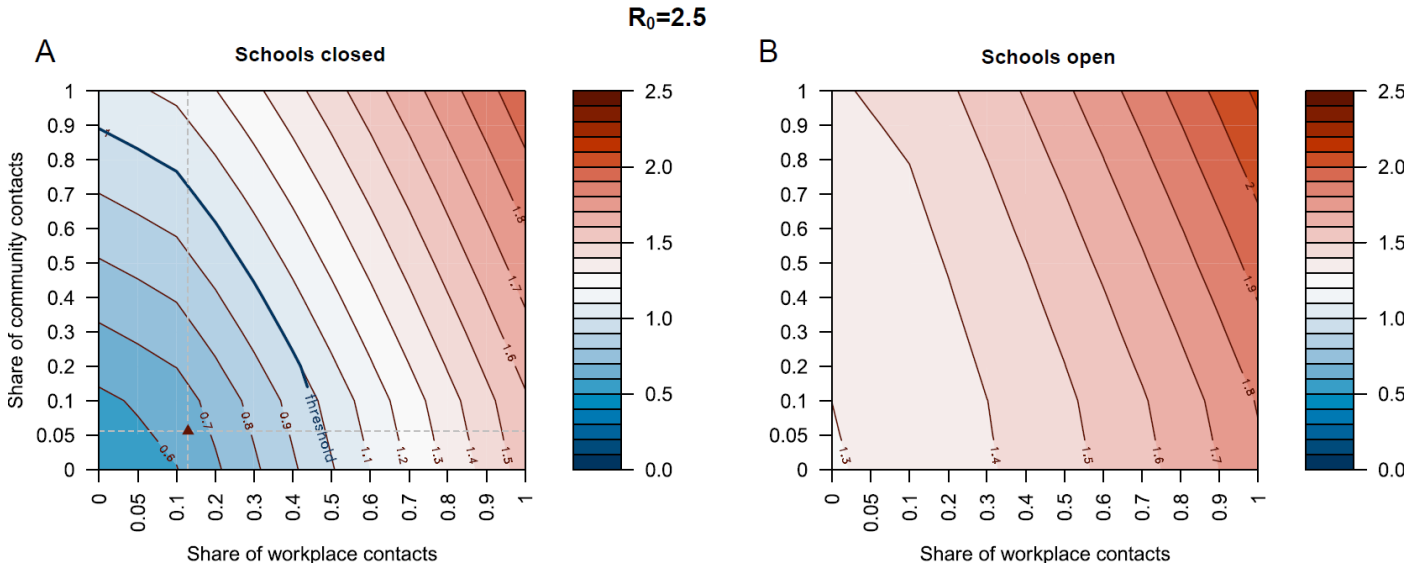

**Figure S33.** Effect of relaxing interventions on the epidemic spread assuming workplaces, community, and schools are reopened in Changsha ( $R_0=2.5$ ).

## 9. Degree of return to pre-pandemic contacts leading $R_0=1$

We finally estimated the degree of return to pre-pandemic contact that could bring  $R_0$  above the threshold in the four observed cities. We kept the baseline contact matrix for the household contacts and increased the baseline contact matrix for the contacts outside the household. Fig. S34 showed the changes of  $R_0$  with the gradual increase of the fraction of resumed contacts outside the household. We find that the resumption of up to 34% of non-household contacts (corresponding to a mean of 7.8 contacts per day) can make  $R_0$  reach the threshold in Shanghai, 26% (corresponding to 3.4 contacts per day), 27% (corresponding to 4.1 contacts per day), and 30% (corresponding to 5.5 contacts per day) in Shenzhen, Changsha, and Wuhan, respectively.

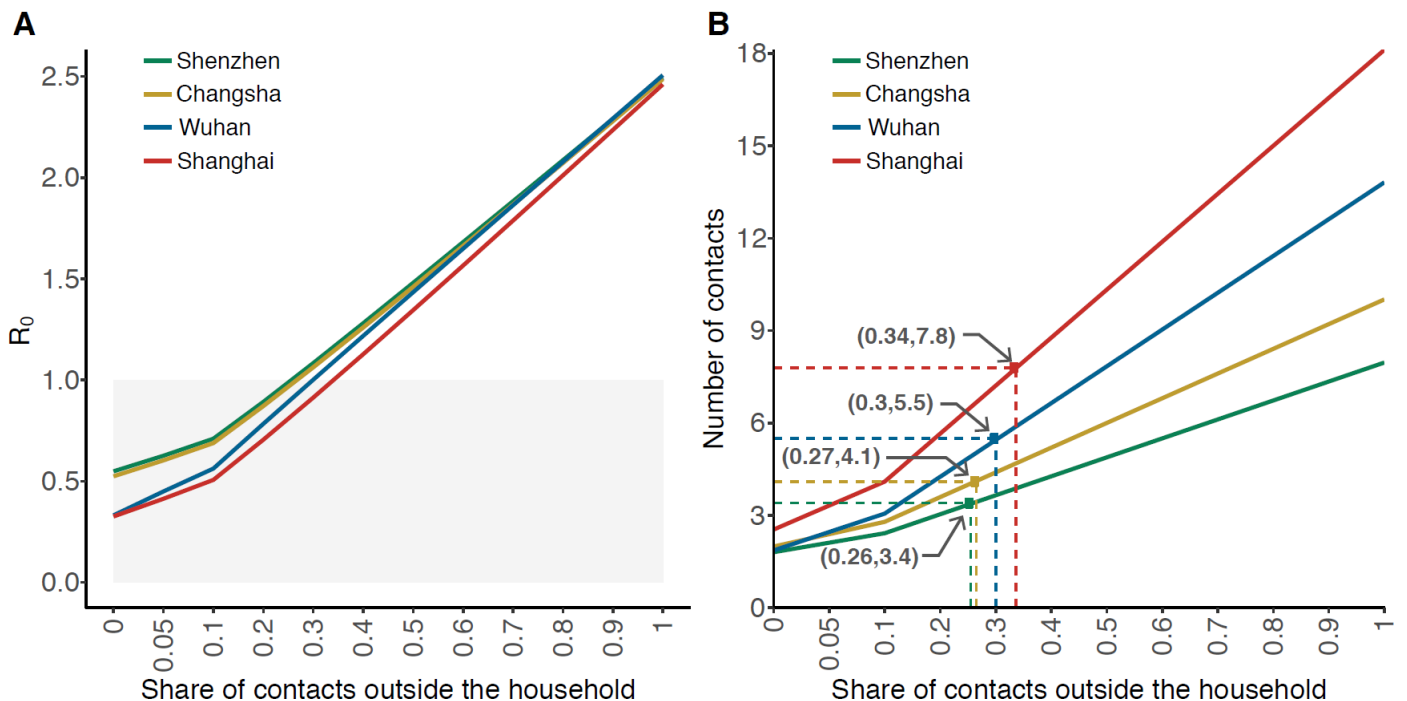

**Figure S34.** *Effect of degree of return to pre-pandemic contacts on the epidemic spread assuming  $R_0=2.5$ , age-specific susceptibility, and equal infectiousness by age. (A) Estimated mean value of  $R_0$  for different share of contacts outside the household in the four locations. (B) The corresponding mean number of contacts for different share of contacts outside the household. Dotted lines stand for the share of contacts outside the household and the corresponding mean number of contacts per day that lead  $R_0$  above the epidemic threshold.*
